# Supplementary material for: Tuning excited-state-intramolecular-proton-transfer (ESIPT) process and emission by cocrystal formation: a combined experimental and theoretical study
Source: Royal Society of Chemistry journal article supplement (doi:10.1039/c6sc04354b), 2016-11-14
Supplement: c6sc04354b1.pdf [file c6sc04354b1.pdf]

## Supporting Information:

### **Tuning Excited-State Intramolecular Proton Transfer (ESIPT) Process and Emission by the Cocrystal Formation: A Combined Experimental and Theoretical Study**

Heyang Lin, Xue-Ping Chang, Dongpeng Yan\*, Wei-Hai Fang, and Ganglong Cui\*

Key Laboratory of Theoretical and Computational Photochemistry, Ministry of Education, College of Chemistry, Beijing Normal University, Beijing 100875, China

### **Contents**

1. Experimental parts
2. Computational parts

### **Experimental Parts:**

**Materials.** All the compounds were purchased from Sigma Chemical. Co. Ltd. and used without further purification.

**Characterization:** Single-crystal X-ray diffraction data of all compounds was collected on a Bruker SMART APEX CCD diffractometer equipped with graphite monochromatized Mo-K $\alpha$  radiation ( $\lambda = 0.71073 \text{ \AA}$ ) using the  $\omega$ -scan technique. Photoluminescence (PL), PL quantum yield (PLQY), PL lifetime and temperature-dependent PL experiments were conducted on an Edinburgh FLS980 fluorescence spectrometer.

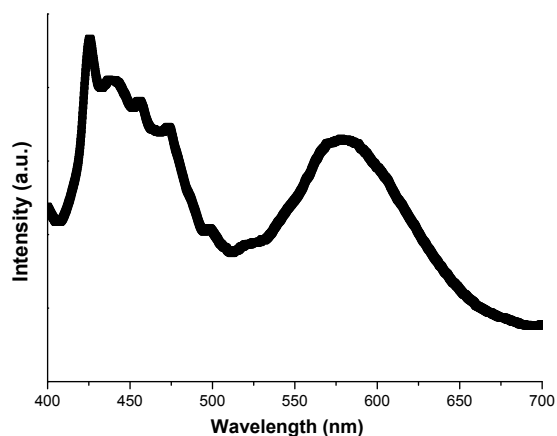

**Figure S1.** Fluorescence spectra of the form of pristine UV-P in chloroform solution ( $10^{-5}$  mol/L).

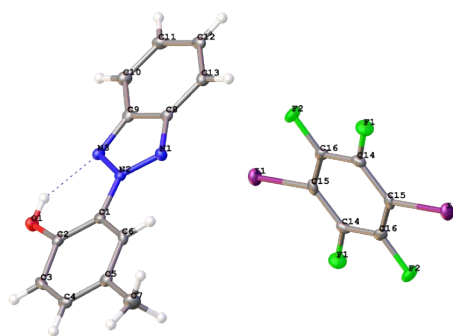

**Figure S2.** Crystal graphic of **A.B.**

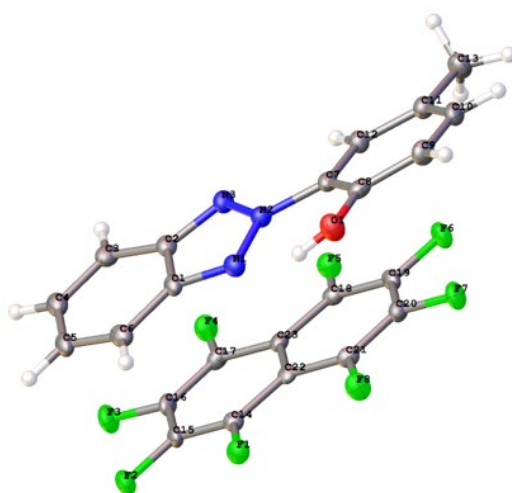

**Figure S3.** Crystal graphic of **A.C.**

**Table S1. Crystal structure information of UV-P cocrystals**

|                 | <b>AB (CCDC: 1454755)</b>  | <b>AC (CCDC: 1454754)</b> |
|-----------------|----------------------------|---------------------------|
| Formula         | $C_{32}H_{22}F_4I_2N_6O_2$ | $C_{23}H_{11}F_8N_3O$     |
| Formula weight  | 852.36                     | 497.35                    |
| Temperature/K   | 97.20(10)                  | 97.3                      |
| Crystal system  | monoclinic                 | monoclinic                |
| Space group     | $P2_1/c$                   | $P2_1/c$                  |
| $a(\text{\AA})$ | 15.842(8)                  | 6.5595(9)                 |
| $b(\text{\AA})$ | 5.6980(5)                  | 41.849(3)                 |

|                                                  |               |                |
|--------------------------------------------------|---------------|----------------|
| $c(\text{\AA})$                                  | 16.7517(15)   | 6.9922(5)      |
| $\alpha(\text{deg})$                             | 90.00         | 90.00          |
| $\beta(\text{deg})$                              | 94.72(2)      | 94.939(8)      |
| $\gamma(\text{deg})$                             | 90.00         | 90.00          |
| $Z$                                              | 2             | 4              |
| $2\theta$ range                                  | 6.8 to 51.98° | 5.92 to 51.98° |
| $D_c/\text{g}\cdot\text{cm}^{-3}$                | 1.878         | 1.727          |
| $F(000)$                                         | 828           | 1000           |
| $R_{int}$                                        | 0.0381        | 0.0486         |
| GOF                                              | 1.028         | 1.090          |
| $R_1[I > 2\sigma(I)]$                            | 0.0332        | 0.0642         |
| $wR_2(\text{all data})$                          | 0.0753        | 0.1452         |
| $\rho_{max}/\rho_{min}(\text{e}\text{\AA}^{-3})$ | 0.642/-0.620  | 0.274/-0.361   |

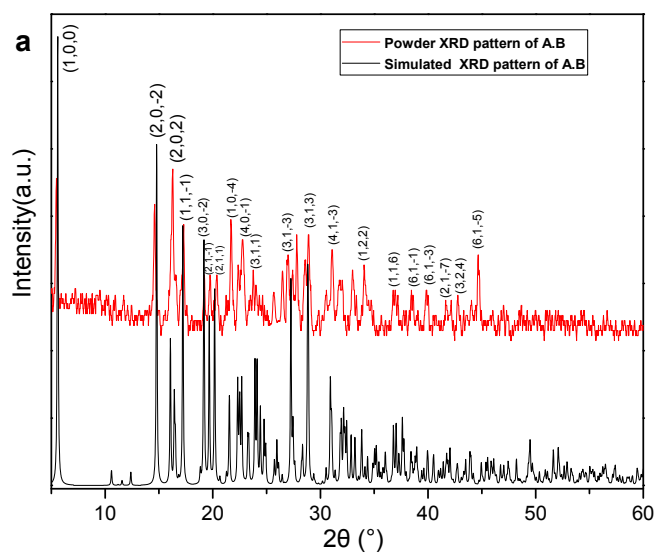

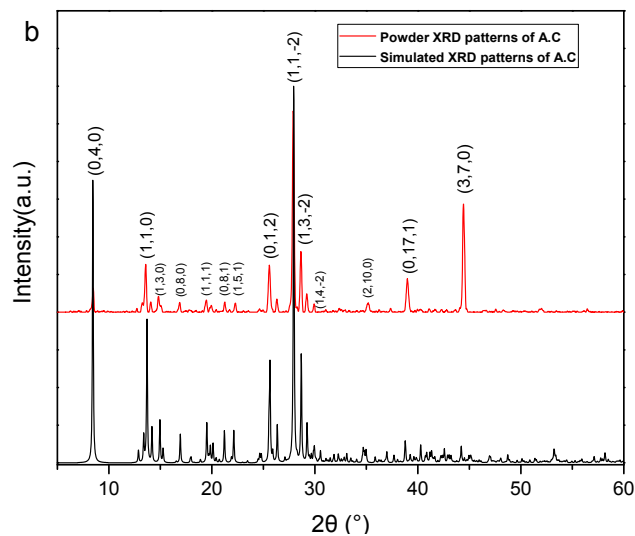

**Figure S4.** Simulated powder XRD patterns calculated from the crystallographic data of **A.B.** (black line) and measured powder XRD patterns (red line) of the **A.B.** (left) and **A.C.** powders (right).

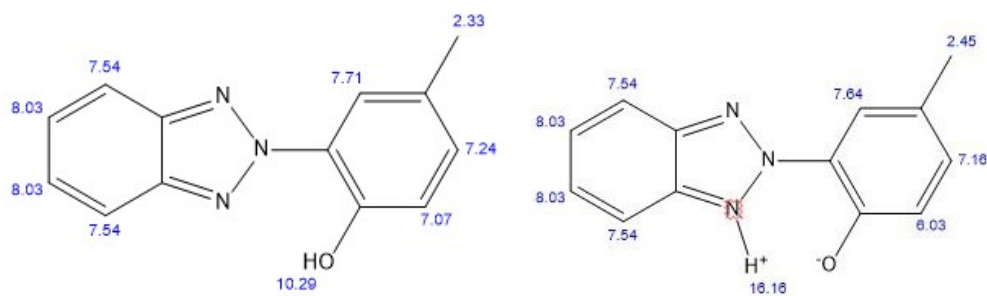

**Figure S5.** The predicted solid-state  $^1\text{H}$  nuclear magnetic resonance shift of UV-P.

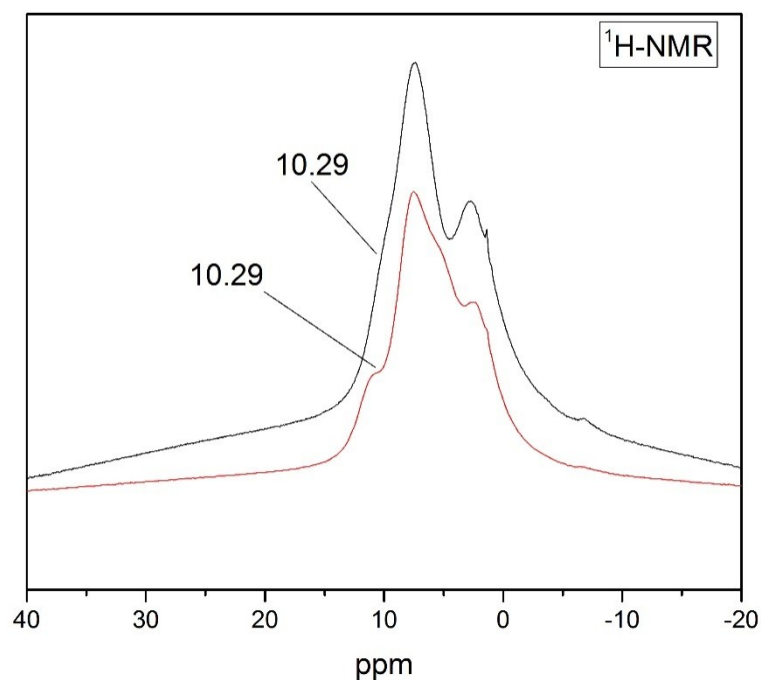

**Figure S6.** <sup>1</sup>H solid-state nuclear magnetic resonance spectra of **A.B.** (red line) and **A.C.** (black line) samples.

<sup>1</sup>H-NMR positions of the UV-P molecule can be theoretically predicted using the ChemDraw software, and the signals for H atom attached to O and N atoms appear at 10.29 and 16.16 ppm respectively (Figure S5). For the experimental solid-state NMR results, although the resolution of NMR is relative lower, it was observed that should peaks located at ca. 10.29 ppm appeared for **A.B.** and **A.C.** as shown in Figure S6, while there is a lack of signal at ca. 16.16 ppm. Therefore, it can be concluded that the H-atom in **A.B.** and **A.C.** belongs to hydroxyl group.

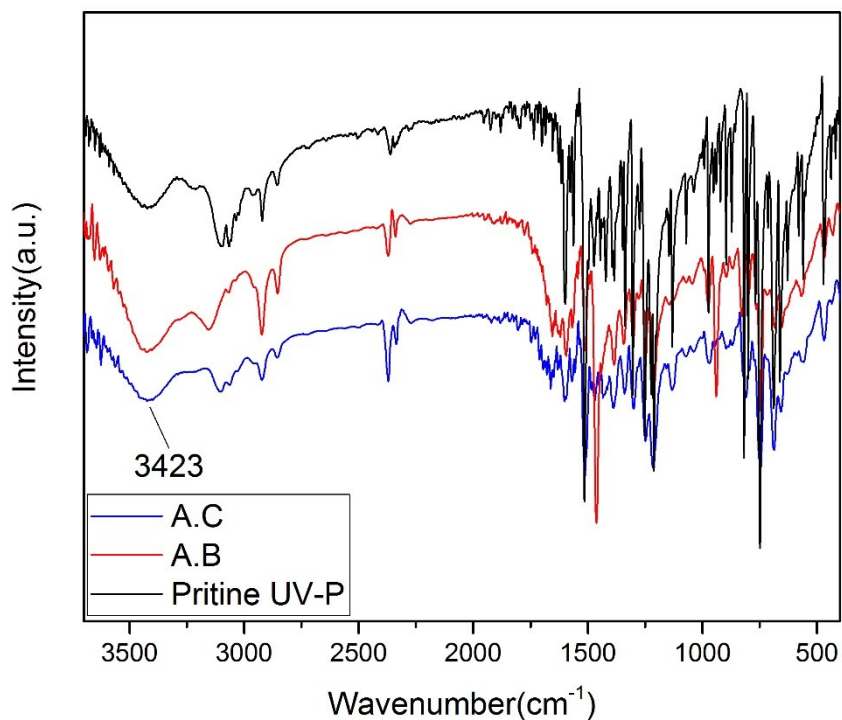

**Figure S7.** Fourier transform infrared spectra of pristine UV-P (black line), **A.B.** (blue line) and **A.C.** (red line) samples.

FTIR spectra of **A.B.** and **A.C.** (Figure S7) show that broad OH peak appeared at  $3423\text{ cm}^{-1}$ , which has no obvious shift relative to the pristine UV-P, suggesting that the position of H-atom in OH in the ground state for **A.B.** and **A.C.**.

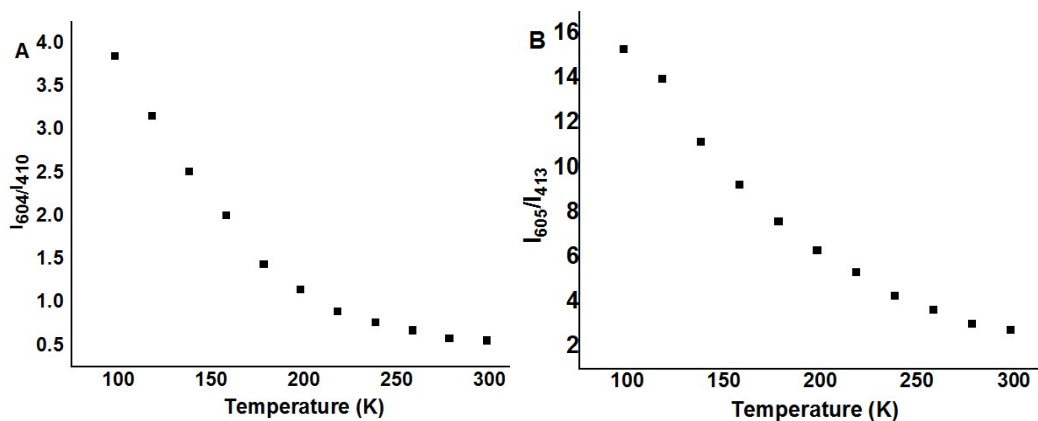

**Figure S8.** Temperature-dependent values of  $I_{604}/I_{410}$  for **A** (A) and  $I_{605}/I_{413}$  for **A.B.** (B).

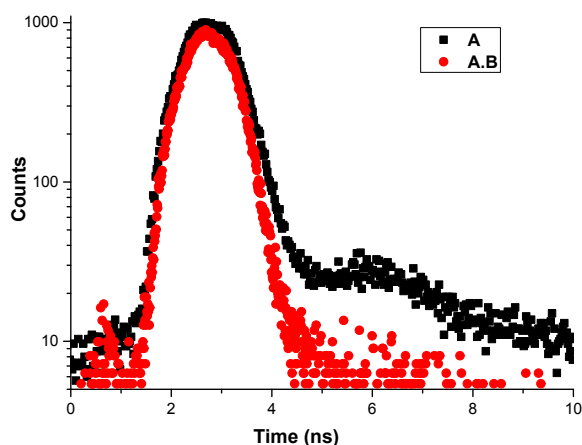

**Figure S9.** Fluorescence decay curves of solid-state **A** (crystal, red line) and **A.B.** (crystal, black line) samples monitored at 605 nm.

**Table S2:** Comparison of main parameters of the UV-P molecule in pristine **A** and cocrystals.

| Samples          | Pristine UV-P | <b>A.B</b> | <b>A.C</b> |
|------------------|---------------|------------|------------|
| Distance a       | 1.430         | 1.432      | 1.437      |
| Distance b       | 1.361         | 1.362      | 1.365      |
| Angle A          | 124.57°       | 125.77°    | 125.37°    |
| dihedral angle B | 179.31°       | 177.4°     | 168.09°    |

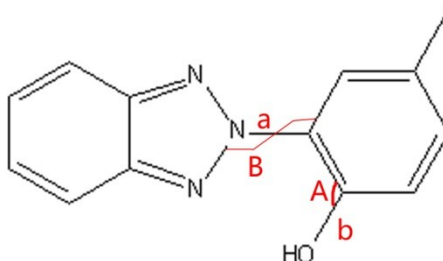

The possible conformational changes of UV-P have been understood by comprising the typical conformational parameters (such as the N-C and C-O distances,  $\angle$ CCO (angle A), and  $\angle$ NNCC (dihedral angle B) as shown above) of UV-P in the pristine crystal and cocrystals **A.B** and **A.C**. It was observed that the parameters are very close for the pristine **A** and **A.B.**, and thus restrict the understanding on the alternation of optical properties from a molecular structure view. However, for **A.C.**, the dihedral angle between the phenyl and benzotriazole groups has decreased relative to that of the pristine



**A**, indicating that the coplanarity of **A** has been reduced after intermolecular interaction with **C**. The change of coplanarity could explain the largely decreased ESIPT emission and quantum yield in experiment from a conformation perspective. Therefore, the conformational factors can partially influence the ESIPT emission of the samples.

### Computational Parts

**Ground State Periodic Calculations.** Ground-state bulk molecular crystals are first optimized using the DMol3 module of Materials Studio package. [1-4] The starting geometric parameters of molecular crystals are taken from the experimental data. Full optimizations of the enol forms of molecular crystals **A**, **A.B.**, and **A.C.** including cell parameters and molecular geometric parameters are carried out at the PBE level [5-6] with periodic boundary conditions (PBC). The DNP basis set [7] is used to expand the electronic wavefunction and the default dispersion correction is added to consider intermolecular weak interactions. A Monkhorst-Pack k-point grids of 2\*2\*2 are used. [8] Default convergence criteria on gradients and displacements are used.

**QM/QM' Calculations.** For **A** molecular crystal, a cluster of 15 molecules of **UVP** was extracted from the fully optimized molecular crystals in the enol form for the ONIOM QM/QM' calculations. A **UVP** molecule is treated using a high-level QM method; while the remaining 14 molecules are done using a low-level QM' method. For cocrystal **A.B.**, a **UVP** molecule is treated at the high QM level; 12 **UVP** molecules and 5 **B** cocrystal molecules are kept in the low-level QM' region. For cocrystal **A.C.**, a **UVP** molecule is included in the high-level QM region; 8 **UVP** molecules and 7 cocrystal **C** molecules are placed in the low-level QM' region.

For the  $S_0$  calculations, the QM region is fully optimized at the CAM-B3LYP/6-31+G\* level [9-14] with surrounding molecules fixed (QM' region; HF/3-21G level). [15-19] For the  $S_1$  calculations, the QM region is described using the TD-CAM-B3LYP/6-31+G\* method; [20, 21] the QM' region still uses the same HF/3-21G method. In the ONIOM QM/QM' calculations, the Müliken charge embedding scheme is also used to consider the polarization effects. This computational protocol for molecular crystals has recently been used by Adamo et al. [22-24] to compute excited-state properties of molecular crystals. In all DFT and TD-DFT computations, the LANL2DZ pseudopotential and basis set is applied for the iodine atom; [25] All ONIOM QM/QM' calculations are carried out using the GAUSSIAN09 package. [26]

**QM/MM Calculations.** Vertical excitation and emission energies are also computed using the QM/MM method in which the QM region (the QM layer in

the QM/QM' calculations) is treated by the MS-CASPT2 method with the MM subsystem (the QM' layer) is modeled using the Mülliken charges same as those used in the QM/QM' calculations (see above).

In single-point MS-CASPT2 calculations, [27, 28] an active space of ten electrons in eight orbitals is adopted. The Cholesky decomposition technique with unbiased auxiliary basis sets is used for accurate two-electron integral approximations. [29] The imaginary shift technique (0.2 au) is employed to avoid intruder-state issues. [30] The ionization potential–electron affinity shift is not used in all MS-CASPT2 computations. [31] In all computations, the LANL2DZ pseudopotential and basis set [32] is applied for the iodine atom; all other atoms (C, H, O, N, and F) are treated with 6-31G\* basis set. [33, 34] All MS-CASPT2 computations are performed using MOLCAS8.0. [35, 36]

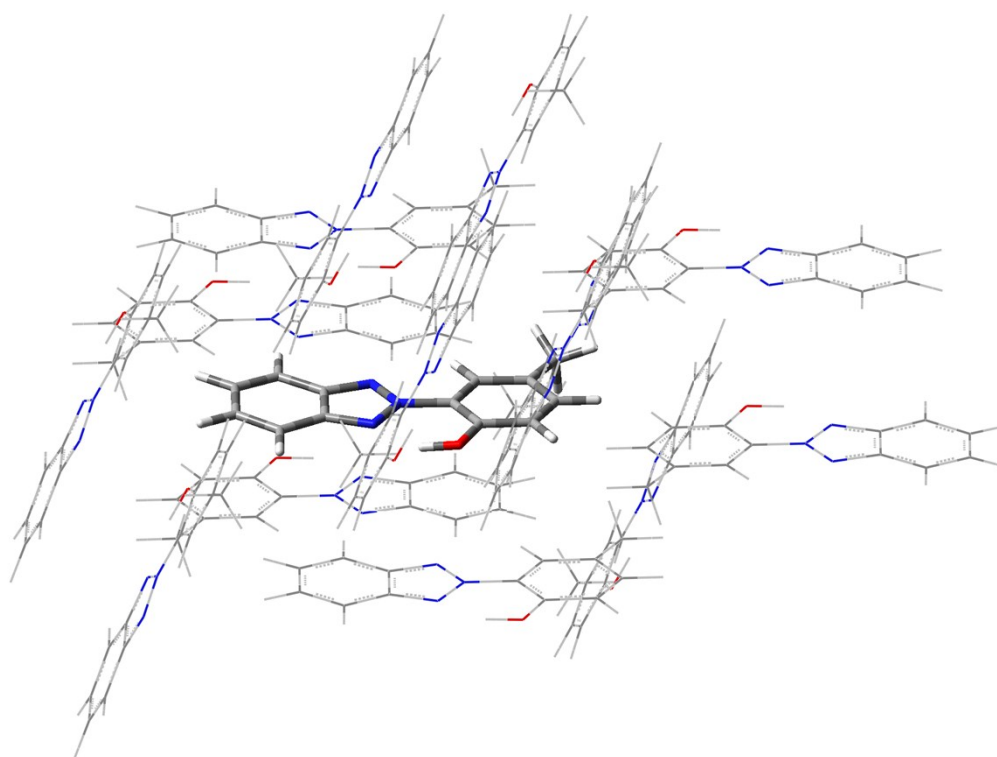

**A**

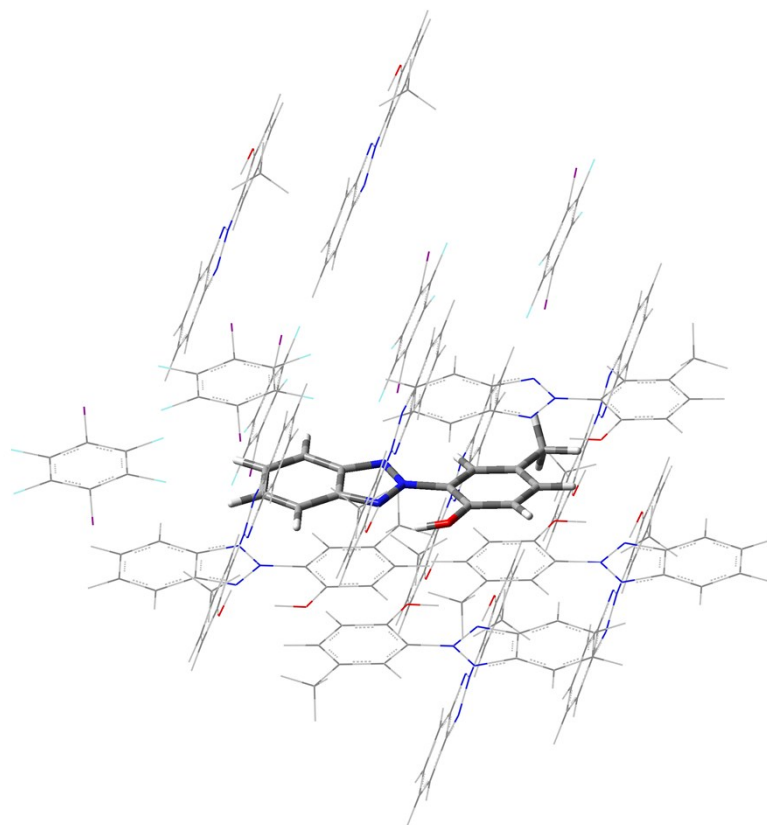

**A.B.**

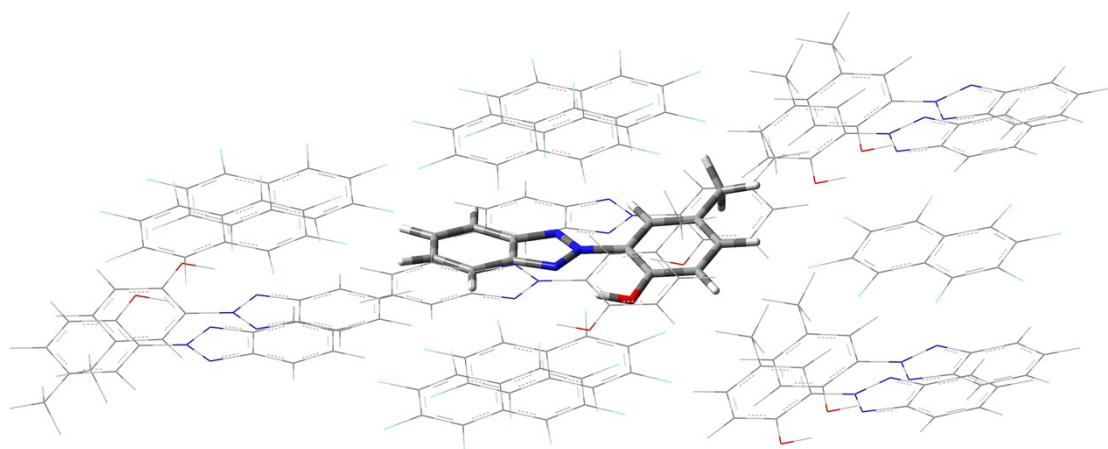

**A.C.**

**Figure S10.** Schematic representations of the **A**, **A.B.**, and **A.C.** clusters in the enol form.

**Table S3:** Vertical Emission Bands (in kcal/mol and nm) of Molecular Crystals **A**, **A.B.**, and **A.C.** Computed by ONIOM(TD-CAM-B3LYP/6-31+G\*:HF/3-21G) Method.

|                  | enol          |               | keto          |               |
|------------------|---------------|---------------|---------------|---------------|
|                  | kcal/mol (nm) | Exp.          | kcal/mol (nm) | Exp.          |
| <b>UV-P (A.)</b> | 76.6 (373)    | 69.7<br>(410) | 44.6 (641)    | 47.3<br>(604) |

|                    |            |               |            |               |
|--------------------|------------|---------------|------------|---------------|
| <b>UV-I (A.B.)</b> | 78.1 (366) | 69.2<br>(413) | 48.0 (596) | 47.3<br>(605) |
| <b>UV-F (A.C.)</b> | 77.6 (368) | 69.7<br>(410) | 42.6 (672) | 46.4<br>(617) |

**Table S4:** Vertical Emission Bands (in kcal/mol and nm) of Molecular Cocrytals **A**, **A.B.**, and **A.C.** Computed by MS-CASPT2(10,8)//ONIOM(TD-CAM-B3LYP/6-31+G\*:HF/3-21G) Method. Also Shown are the Oscillator Strengths (f) in Square Brackets.

|                    | enol                   |               | keto                   |               |
|--------------------|------------------------|---------------|------------------------|---------------|
|                    | kcal/mol (nm)          | Exp.          | kcal/mol (nm)          | Exp.          |
| <b>UV-P (A.)</b>   | 71.9 (398)<br>[0.5207] | 69.7<br>(410) | 51.3 (557)<br>[0.4991] | 47.3<br>(604) |
| <b>UV-I (A.B.)</b> | 71.8 (398)<br>[0.7822] | 69.2<br>(413) | 50.1 (571)<br>[0.4270] | 47.3<br>(605) |
| <b>UV-F (A.C.)</b> | 65.2 (438)<br>[0.6894] | 69.7<br>(410) | 47.3 (604)<br>[0.2313] | 46.4<br>(617) |

**Table S5:** MS-CASPT2(10,8)//ONIOM Computed Relative Energies (in kcal/mol) of S<sub>1</sub> Enol and Keto Species of Molecular Crystals **A**, **A.B.**, and **A.C.**

|                       | <b>A</b> | <b>A.B.</b> | <b>A.C.</b> |
|-----------------------|----------|-------------|-------------|
| S <sub>1</sub> (enol) | 79.5     | 79.1        | 70.2        |
| S <sub>1</sub> (keto) | 73.1     | 73.9        | 68.9        |

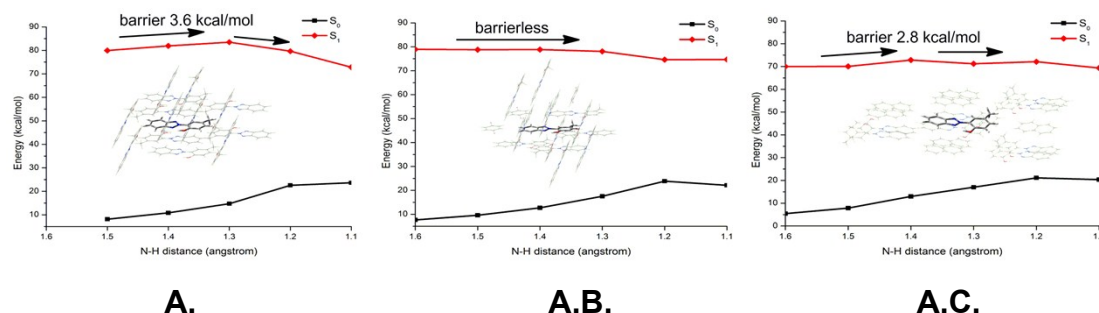

**Figure S11.** Minimum-energy S<sub>1</sub> intramolecular excited-state proton transfer paths of molecular cocrytals **A**, **A.B.**, and **A.C.** computed by MS-CASPT2(10,8)//ONIOM method.

MS-CASPT2 (10e,8o) for S<sub>0</sub> and S<sub>1</sub> (enol) states

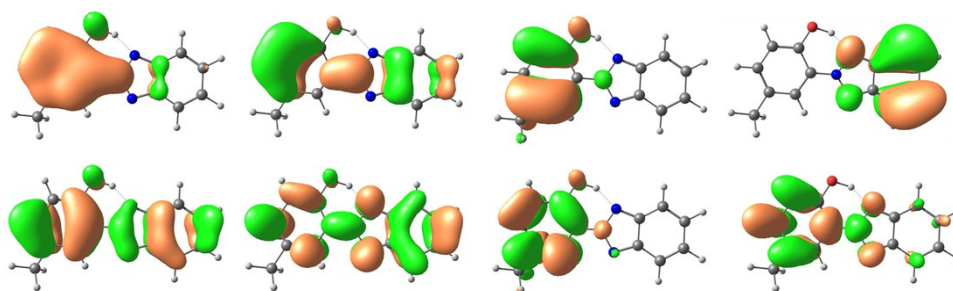

MS-CASPT2 (10e,8o) for  $S_1$  (keto) states

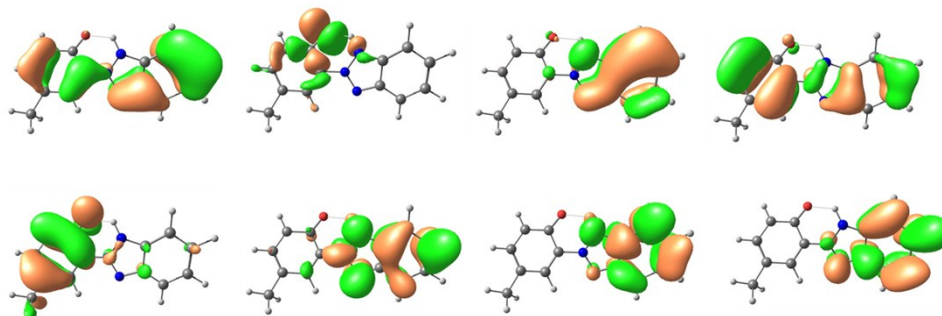

**Figure S12.** Active spaces used for molecular cocystals **A**, **A.B.**, and **A.C.** in the MS-CASPT2(10,8)//ONIOM computations.

## 1. References

- [1] B. Delley, An all-electron numerical method for solving the local density functional for polyatomic molecules. *J. Chem. Phys.*, 92: 508, 1990.
- [2] B. Delley, Fast Calculation of Electrostatics in Crystals and Large Molecules. *J. Phys. Chem.*, 100: 6107, 1996.
- [3] B. Delley, From molecules to solids with the DMol3 approach. *J. Chem. Phys.*, 113: 7756, 2000.
- [4] B. Delley, D. E. Ellis, A. J. Freeman, E. J. Baerends, and D. Post, Binding energy and electronic structure of small copper particles. *Phys. Rev. B* 27: 2132, 1983.
- [5] J. P. Perdew, K. Burke, and M. Ernzerhof, Generalized gradient approximation made simple, *Phys. Rev. Lett.*, 77: 3865, 1996.
- [6] J. P. Perdew, K. Burke, and M. Ernzerhof, Errata: Generalized gradient approximation made simple, *Phys. Rev. Lett.*, 78: 1396, 1997.
- [7] B. Delley, D. E. Ellis, A. J. Freeman, E. J. Baerends, and D. Post, Binding energy and electronic structure of small copper particles. *Phys. Rev. B* 27: 2132, 1983.
- [8] H. J. Monkhorst and J. D. Pack, Special points for Brillouin-zone integrations. *Phys. Rev. B* 13: 5188, 1976.
- [9] S. H. Vosko, L. Wilk, M. Nusair, Accurate spin-dependent electron liquid correlation energies for local spin density calculations: a critical analysis. *Can.*

*J. Phys.*, 58: 1200, 1980.

[10] A. D. Becke, Density-Functional Exchange-Energy Approximation with Correct Asymptotic Behavior. *Phys. Rev. A: At., Mol., Opt. Phys.*, 38: 3098, 1988.

[11] C. Lee, W. T. Yang, R. G. Parr, Phys. Development of the Colle Salvetti Correlation-Energy Formula into a Functional of the Electron Density. *Phys. Rev. B: Condens. Matter Mater. Phys.*, 37: 785, 1988.

[12] A. D. Becke, A New Mixing of Hartree-Fock and Local Density-Functional Theories. *J. Chem. Phys.*, 98: 1372, 1993.

[13] P. C. Hariharan, J. A. Pople, Influence of polarization functions on molecular-orbital hydrogenation energies, *Theor. Chim. Acta* 28: 213, 1973.

[14] M. M. Francl, W. J. Pietro, W. J. Hehre, J. S. Binkley, M. S. Gordon, D. J. De-Frees, J. A. Pople, Self-Consistent Molecular Orbital Methods. 23. A polarization-type basis set for 2nd-row elements, *J. Chem. Phys.*, 77: 3654, 1982.

[15] C. C. J. Roothaan, New Developments in Molecular Orbital Theory, *Rev. Mod. Phys.*, 23: 69, 1951.

[16] J. A. Pople and R. K. Nesbet, Self-Consistent Orbitals for Radicals, *J. Chem. Phys.*, 22: 571, 1954.

[17] R. McWeeny and G. Dierksen, Self-consistent perturbation theory. 2. Extension to open shells, *J. Chem. Phys.*, 49: 4852, 1968.

[18] J. S. Binkley, J. A. Pople, and W. J. Hehre, Self-Consistent Molecular Orbital Methods. 21. Small Split-Valence Basis Sets for First-Row Elements, *J. Am. Chem. Soc.*, 102: 939, 1980.

[19] M. S. Gordon, J. S. Binkley, J. A. Pople, W. J. Pietro, and W. J. Hehre, Self-Consistent Molecular Orbital Methods. 22. Small Split-Valence Basis Sets for Second-Row Elements, *J. Am. Chem. Soc.*, 104:2797, 1982.

[20] T. Yanai, D. Tew, and N. Handy. A new hybrid exchange-correlation functional using the Coulomb-attenuating method (CAM-B3LYP). *Chem. Phys. Lett.*, 393: 51, 2004.

[21] M. A. L. Marques, C. A. Ullrich, F. Nogueira, A. Rubio, K. Burke, E. K. U. Gross, Eds. Time-Dependent Density Functional Theory; Springer: Berlin, Heidelberg, New York, 2006.

[22] H. P. Hratchian, P. V. Parandekar, K. Raghavachari, M. J. Frisch, T. Vreven, QM:QM Electronic Embedding Using Mulliken Atomic Charges: Energies and Analytic Gradients in an ONIOM Framework. *J. Chem. Phys.*, 128: 034107, 2008.

[23] D. Presti, F. Labat, A. Pedone, M. J. Frisch, H. P. Hratchian, I. Ciofini, M. C. Menziani, and C. Adamo, Computational Protocol for Modeling Thermo-chromic Molecular Crystals: Salicylidene Aniline As a Case Study, *J. Chem. Theory Comput.*, 10: 5577, 2014.

[24] G. García, I. Ciofini, M. Fernández-Gómez, C. Adamo, Confinement Effects on UV-Visible Absorption Spectra: B-Carotene Inside Carbon Nanotube as a Test Case. *J. Phys. Chem. Lett.*, 4: 1239, 2013.

- [25] P. J. Hay, and W. R. Wadt. Ab initio effective core potentials for molecular calculations. Potentials for K to Au including the outermost core orbitals. *J. Chem. Phys.*, 82: 299, 1985.
- [26] Gaussian 09, Revision B.01, M. J. Frisch, G. W. Trucks, H. B. Schlegel, G. E. Scuseria, M. A. Robb, J. R. Cheeseman, G. Scalmani, V. Barone, B. Mennucci, G. A. Petersson, H. Nakatsuji, M. Caricato, X. Li, H. P. Hratchian, A. F. Izmaylov, J. Bloino, G. Zheng, J. L. Sonnenberg, M. Hada, M. Ehara, K. Toyota, R. Fukuda, J. Hasegawa, M. Ishida, T. Nakajima, Y. Honda, O. Kitao, H. Nakai, T. Vreven, J. A. Montgomery, Jr., J. E. Peralta, F. Ogliaro, M. Bearpark, J. J. Heyd, E. Brothers, K. N. Kudin, V. N. Staroverov, R. Kobayashi, J. Normand, K. Raghavachari, A. Rendell, J. C. Burant, S. S. Iyengar, J. Tomasi, M. Cossi, N. Rega, J. M. Millam, M. Klene, J. E. Knox, J. B. Cross, V. Bakken, C. Adamo, J. Jaramillo, R. Gomperts, R. E. Stratmann, O. Yazyev, A. J. Austin, R. Cammi, C. Pomelli, J. W. Ochterski, R. L. Martin, K. Morokuma, V. G. Zakrzewski, G. A. Voth, P. Salvador, J. J. Dannenberg, S. Dapprich, A. D. Daniels,  $\square$ . Farkas, J. B. Foresman, J. V. Ortiz, J. Cioslowski, D. J. Fox, Gaussian, Inc., Wallingford CT, 2010.
- [27] K. Andersson, P. Malmqvist, B. Roos, A. Sadlej, and K. Wolinski. Second-Order Perturbation Theory with a CASSCF Reference Function. *J. Phys. Chem.*, 94: 5483, 1990.
- [28] K. Andersson, P. Malmqvist, and B. Roos. Second-order perturbation theory with a complete active space self-consistent field reference function. *J. Chem. Phys.*, 96: 1218, 1992.
- [29] F. Aquilante, R. Lindh, T. B. Pedersen, Unbiased Auxiliary Basis Sets for Accurate Two-Electron Integral Approximations. *J. Chem. Phys.*, 127: 114107, 2007.
- [30] N. Försberg, P. Å. Malmqvist, Multiconfiguration Perturbation Theory with Imaginary Level Shift. *Chem. Phys. Lett.*, 274: 196, 1997.
- [31] G. Ghigo, B. O. Roos, P. Malmqvist, A Modified Definition of the Zeroth-Order Hamiltonian in Multiconfigurational Perturbation Theory (CASPT2). *Chem. Phys. Lett.*, 396: 142, 2004.
- [32] W.R. Wadt and P.J. Hay, Ab initio effective core potentials for molecular calculations. potentials for main group elements sodium to bismuth, *J. Chem. Phys.*, 82: 284, 1985.
- [33] R. Ditchfield, W. J. Hehre, J. A. Pople, Self-Consistent Molecular-Orbital Methods. IX. An Extended Gaussian-Type Basis for Molecular-Orbital Studies of Organic Molecules. *J. Chem. Phys.*, 54: 724, 1971.
- [34] M. M. Francl, W. J. Pietro, W. J. Hehre, J. S. Binkley, M. S. Gordon, D. J. DeFrees, J. A. Pople, Self-Consistent Molecular Orbital Methods. XXIII. A Polarization-Type Basis Set for Second-Row Elements. *J. Chem. Phys.*, 77: 3654, 1982.
- [35] G. Karlström, R. Lindh, P. Å. Malmqvist, B. O. Roos, U. Ryde, V. Veryazov, P. O. Widmark, M. Cossi, B. Schimmelpfennig, P. Neogady, et al. MOLCAS: A Program Package for Computational Chemistry. *Comput. Mater.*

*Sci.*, 28: 222, 2003.

[36] F. Aquilante, L. De Vico, N. Ferré, G. Ghigo, P. Malmqvist, P. Neogrády, T. B.; Pitoňák, M. Pedersen, M. Reiher, B. O. Roos, et al. MOLCAS 7: the Next Generation. *J. Comput. Chem.*, 31: 224, 2010.

#### 4. Cartesian Coordinates of All Optimized Structures

In xyz format (unit: angström)

##### UVP (A)

S<sub>0</sub>

|   |              |              |              |
|---|--------------|--------------|--------------|
| O | 0.211654000  | -0.844954000 | -1.972261000 |
| N | -2.273811000 | 1.661522000  | 0.336328000  |
| N | -2.090271000 | -0.197761000 | -0.912834000 |
| N | -1.506462000 | 0.884624000  | -0.400018000 |
| C | 0.659833000  | 0.307613000  | -1.414558000 |
| C | 1.994300000  | 0.649342000  | -1.619417000 |
| C | 2.524225000  | 1.810434000  | -1.082053000 |
| C | 1.741264000  | 2.676229000  | -0.313906000 |
| C | 0.418558000  | 2.325517000  | -0.086714000 |
| C | -0.129355000 | 1.168018000  | -0.636397000 |
| C | -3.355136000 | -0.129952000 | -0.461399000 |
| C | -3.465845000 | 1.036878000  | 0.329368000  |
| C | -4.669988000 | 1.370399000  | 0.990211000  |
| C | -5.713143000 | 0.491820000  | 0.843837000  |
| C | -4.457658000 | -0.993347000 | -0.647715000 |
| C | -5.608864000 | -0.673738000 | 0.025248000  |
| C | 2.299528000  | 3.977370000  | 0.195911000  |
| H | -0.763907000 | -0.888988000 | -1.840586000 |
| H | 2.593297000  | -0.016257000 | -2.229895000 |
| H | 3.566159000  | 2.058090000  | -1.254518000 |
| H | -0.216037000 | 2.956095000  | 0.519764000  |
| H | -4.737371000 | 2.278050000  | 1.579418000  |
| H | -6.648976000 | 0.671094000  | 1.360875000  |
| H | -4.409242000 | -1.858565000 | -1.295872000 |
| H | -6.460920000 | -1.331375000 | -0.091372000 |
| H | 2.076419000  | 4.787641000  | -0.504389000 |
| H | 3.383930000  | 3.923023000  | 0.310915000  |
| H | 1.860053000  | 4.249321000  | 1.158238000  |
| O | 4.087389000  | -2.032129000 | 6.980103000  |
| N | 2.686201000  | -4.231366000 | 3.649166000  |
| N | 2.634303000  | -2.292878000 | 4.843298000  |
| N | 3.118517000  | -3.545082000 | 4.704612000  |
| C | 4.497924000  | -3.303355000 | 6.733580000  |
| C | 5.415952000  | -3.886324000 | 7.617967000  |
| C | 5.879568000  | -5.184091000 | 7.418645000  |



|   |               |              |              |
|---|---------------|--------------|--------------|
| C | 5.448330000   | -5.954480000 | 6.323864000  |
| C | 4.536235000   | -5.380503000 | 5.437260000  |
| C | 4.057533000   | -4.077667000 | 5.629322000  |
| C | 1.816854000   | -2.144810000 | 3.772175000  |
| C | 1.857584000   | -3.358778000 | 3.021811000  |
| C | 1.135625000   | -3.507457000 | 1.816429000  |
| C | 0.398694000   | -2.410801000 | 1.396033000  |
| C | 1.038658000   | -1.046294000 | 3.342959000  |
| C | 0.348395000   | -1.201432000 | 2.148469000  |
| C | 5.917857000   | -7.372570000 | 6.131842000  |
| H | 3.407798000   | -1.806062000 | 6.272289000  |
| H | 5.739865000   | -3.292455000 | 8.474926000  |
| H | 6.593268000   | -5.622846000 | 8.119767000  |
| H | 4.174680000   | -5.943091000 | 4.577745000  |
| H | 1.173955000   | -4.444876000 | 1.256691000  |
| H | -0.172799000  | -2.468859000 | 0.468387000  |
| H | 0.973926000   | -0.125662000 | 3.924494000  |
| H | -0.255501000  | -0.369931000 | 1.780837000  |
| H | 5.070406000   | -8.068039000 | 6.248443000  |
| H | 6.688908000   | -7.642160000 | 6.868107000  |
| H | 6.328960000   | -7.524614000 | 5.119951000  |
| O | -8.098221000  | -0.618703000 | 3.297982000  |
| N | -9.499409000  | -2.817939000 | -0.032955000 |
| N | -9.551306000  | -0.879451000 | 1.161177000  |
| N | -9.067093000  | -2.131655000 | 1.022491000  |
| C | -7.687686000  | -1.889927000 | 3.051459000  |
| C | -6.769657000  | -2.472896000 | 3.935846000  |
| C | -6.306042000  | -3.770664000 | 3.736524000  |
| C | -6.737279000  | -4.541052000 | 2.641743000  |
| C | -7.649374000  | -3.967076000 | 1.755139000  |
| C | -8.128076000  | -2.664240000 | 1.947201000  |
| C | -10.368756000 | -0.731382000 | 0.090054000  |
| C | -10.328024000 | -1.945352000 | -0.660310000 |
| C | -11.049984000 | -2.094030000 | -1.865692000 |
| C | -11.786915000 | -0.997374000 | -2.286088000 |
| C | -11.146951000 | 0.367133000  | -0.339162000 |
| C | -11.837214000 | 0.211995000  | -1.533652000 |
| C | -6.267753000  | -5.959143000 | 2.449721000  |
| H | -8.777811000  | -0.392635000 | 2.590168000  |
| H | -6.445744000  | -1.879028000 | 4.792805000  |
| H | -5.592342000  | -4.209418000 | 4.437646000  |
| H | -8.010929000  | -4.529664000 | 0.895624000  |
| H | -11.011654000 | -3.031450000 | -2.425430000 |
| H | -12.358409000 | -1.055431000 | -3.213734000 |

|   |               |              |              |
|---|---------------|--------------|--------------|
| H | -11.211684000 | 1.287766000  | 0.242373000  |
| H | -12.441111000 | 1.043495000  | -1.901284000 |
| H | -7.115203000  | -6.654613000 | 2.566322000  |
| H | -5.496701000  | -6.228733000 | 3.185986000  |
| H | -5.856650000  | -6.111187000 | 1.437830000  |
| O | -1.383342000  | -6.571523000 | 2.367500000  |
| N | 0.017847000   | -4.372286000 | 5.698437000  |
| N | 0.069960000   | -6.309871000 | 4.503932000  |
| N | -0.414471000  | -5.058569000 | 4.642990000  |
| C | -1.793877000  | -5.300298000 | 2.614023000  |
| C | -2.711470000  | -4.716843000 | 1.728381000  |
| C | -3.175521000  | -3.419561000 | 1.928958000  |
| C | -2.744066000  | -2.649589000 | 3.022857000  |
| C | -1.831971000  | -3.222246000 | 3.909971000  |
| C | -1.353269000  | -4.525082000 | 3.717908000  |
| C | 0.887192000   | -6.458842000 | 5.575428000  |
| C | 0.846462000   | -5.244873000 | 6.325792000  |
| C | 1.568639000   | -5.095292000 | 7.530802000  |
| C | 2.305570000   | -6.191948000 | 7.951198000  |
| C | 1.665388000   | -7.557358000 | 6.004644000  |
| C | 2.355869000   | -7.401318000 | 7.198761000  |
| C | -3.213593000  | -1.230179000 | 3.215388000  |
| H | -0.703316000  | -6.797104000 | 3.074059000  |
| H | -3.035601000  | -5.310294000 | 0.872304000  |
| H | -3.889003000  | -2.981223000 | 1.226954000  |
| H | -1.470634000  | -2.660562000 | 4.769858000  |
| H | 1.530308000   | -4.157873000 | 8.090540000  |
| H | 2.876845000   | -6.134793000 | 8.879216000  |
| H | 1.730338000   | -8.477088000 | 5.422736000  |
| H | 2.959549000   | -8.233720000 | 7.566766000  |
| H | -2.366142000  | -0.536030000 | 3.098278000  |
| H | -3.984643000  | -0.961908000 | 2.478613000  |
| H | -3.624696000  | -1.078135000 | 4.227279000  |
| O | 5.368735000   | -4.478783000 | 1.800437000  |
| N | 3.967547000   | -6.678019000 | -1.530500000 |
| N | 3.915650000   | -4.739532000 | -0.336367000 |
| N | 4.399864000   | -5.991736000 | -0.475053000 |
| C | 5.779271000   | -5.750007000 | 1.553914000  |
| C | 6.697298000   | -6.332977000 | 2.438301000  |
| C | 7.160914000   | -7.630744000 | 2.238979000  |
| C | 6.729677000   | -8.401132000 | 1.144198000  |
| C | 5.817582000   | -7.827157000 | 0.257594000  |
| C | 5.338879000   | -6.524321000 | 0.449656000  |
| C | 3.098201000   | -4.591462000 | -1.407491000 |

|   |               |               |              |
|---|---------------|---------------|--------------|
| C | 3.138931000   | -5.805432000  | -2.157855000 |
| C | 2.416972000   | -5.954111000  | -3.363237000 |
| C | 1.680041000   | -4.857454000  | -3.783633000 |
| C | 2.320005000   | -3.492947000  | -1.836706000 |
| C | 1.629742000   | -3.648084000  | -3.031196000 |
| C | 7.199204000   | -9.819224000  | 0.952176000  |
| H | 4.689145000   | -4.252716000  | 1.092623000  |
| H | 7.021211000   | -5.739109000  | 3.295260000  |
| H | 7.874614000   | -8.069499000  | 2.940101000  |
| H | 5.456027000   | -8.389744000  | -0.601921000 |
| H | 2.455302000   | -6.891530000  | -3.922975000 |
| H | 1.108548000   | -4.915512000  | -4.711279000 |
| H | 2.255273000   | -2.572315000  | -1.255171000 |
| H | 1.025844000   | -2.816587000  | -3.398830000 |
| H | 6.351753000   | -10.514693000 | 1.068777000  |
| H | 7.970255000   | -10.088813000 | 1.688441000  |
| H | 7.610307000   | -9.971267000  | -0.059715000 |
| O | -6.816875000  | -3.065356000  | -1.881684000 |
| N | -8.218063000  | -5.264593000  | -5.212621000 |
| N | -8.269959000  | -3.326105000  | -4.018488000 |
| N | -7.785746000  | -4.578309000  | -4.157174000 |
| C | -6.406339000  | -4.336580000  | -2.128207000 |
| C | -5.488310000  | -4.919550000  | -1.243820000 |
| C | -5.024695000  | -6.217317000  | -1.443142000 |
| C | -5.455932000  | -6.987706000  | -2.537923000 |
| C | -6.368027000  | -6.413730000  | -3.424527000 |
| C | -6.846730000  | -5.110894000  | -3.232465000 |
| C | -9.087409000  | -3.178036000  | -5.089612000 |
| C | -9.046678000  | -4.392005000  | -5.839976000 |
| C | -9.768637000  | -4.540684000  | -7.045358000 |
| C | -10.505568000 | -3.444028000  | -7.465754000 |
| C | -9.865604000  | -2.079520000  | -5.518827000 |
| C | -10.555868000 | -2.234658000  | -6.713318000 |
| C | -4.986406000  | -8.405797000  | -2.729945000 |
| H | -7.496464000  | -2.839288000  | -2.589498000 |
| H | -5.164398000  | -4.325682000  | -0.386861000 |
| H | -4.310995000  | -6.656072000  | -0.742020000 |
| H | -6.729582000  | -6.976317000  | -4.284042000 |
| H | -9.730307000  | -5.478103000  | -7.605096000 |
| H | -11.077062000 | -3.502085000  | -8.393400000 |
| H | -9.930337000  | -1.158888000  | -4.937292000 |
| H | -11.159764000 | -1.403158000  | -7.080950000 |
| H | -5.833857000  | -9.101265000  | -2.613344000 |
| H | -4.215354000  | -8.675387000  | -1.993680000 |

|   |              |               |              |
|---|--------------|---------------|--------------|
| H | -4.575303000 | -8.557841000  | -3.741836000 |
| O | 1.476263000  | -3.198003000  | -7.102043000 |
| N | -1.019726000 | -0.546336000  | -4.947766000 |
| N | -0.815604000 | -2.502480000  | -6.095901000 |
| N | -0.236146000 | -1.373654000  | -5.635806000 |
| C | 1.940586000  | -2.028791000  | -6.589778000 |
| C | 3.291146000  | -1.708421000  | -6.790053000 |
| C | 3.829877000  | -0.527454000  | -6.286466000 |
| C | 3.043532000  | 0.383772000   | -5.560549000 |
| C | 1.698891000  | 0.072877000   | -5.355352000 |
| C | 1.142464000  | -1.109892000  | -5.860199000 |
| C | -2.095271000 | -2.408229000  | -5.658024000 |
| C | -2.217387000 | -1.184284000  | -4.933638000 |
| C | -3.430806000 | -0.810726000  | -4.312121000 |
| C | -4.488227000 | -1.699252000  | -4.433923000 |
| C | -3.191128000 | -3.288442000  | -5.795529000 |
| C | -4.371329000 | -2.916347000  | -5.166236000 |
| C | 3.616964000  | 1.681817000   | -5.053815000 |
| H | 0.490893000  | -3.230949000  | -6.897329000 |
| H | 3.897708000  | -2.410218000  | -7.365851000 |
| H | 4.884325000  | -0.293254000  | -6.454693000 |
| H | 1.053859000  | 0.752220000   | -4.799997000 |
| H | -3.508877000 | 0.130911000   | -3.765340000 |
| H | -5.446595000 | -1.463744000  | -3.968555000 |
| H | -3.118784000 | -4.209958000  | -6.374764000 |
| H | -5.236403000 | -3.577458000  | -5.242482000 |
| H | 3.139841000  | 2.529997000   | -5.570224000 |
| H | 4.701154000  | 1.736214000   | -5.229483000 |
| H | 3.428272000  | 1.808453000   | -3.973770000 |
| O | -0.101995000 | -9.018175000  | -2.812166000 |
| N | 1.299193000  | -6.818939000  | 0.518771000  |
| N | 1.351306000  | -8.756525000  | -0.675734000 |
| N | 0.866876000  | -7.505223000  | -0.536675000 |
| C | -0.512531000 | -7.746951000  | -2.565643000 |
| C | -1.430123000 | -7.163496000  | -3.451284000 |
| C | -1.894174000 | -5.866214000  | -3.250708000 |
| C | -1.462719000 | -5.096243000  | -2.156811000 |
| C | -0.550626000 | -5.668900000  | -1.269695000 |
| C | -0.071922000 | -6.971735000  | -1.461757000 |
| C | 2.168539000  | -8.905496000  | 0.395762000  |
| C | 2.127809000  | -7.691526000  | 1.146127000  |
| C | 2.849986000  | -7.541946000  | 2.351136000  |
| C | 3.586917000  | -8.638602000  | 2.771532000  |
| C | 2.946735000  | -10.004011000 | 0.824978000  |

|   |              |               |              |
|---|--------------|---------------|--------------|
| C | 3.637216000  | -9.847971000  | 2.019095000  |
| C | -1.932248000 | -3.676835000  | -1.964303000 |
| H | 0.578031000  | -9.243758000  | -2.105607000 |
| H | -1.754254000 | -7.756948000  | -4.307361000 |
| H | -2.607656000 | -5.427877000  | -3.952712000 |
| H | -0.189287000 | -5.107214000  | -0.409808000 |
| H | 2.811655000  | -6.604526000  | 2.910874000  |
| H | 4.158192000  | -8.581447000  | 3.699550000  |
| H | 3.011685000  | -10.923741000 | 0.243070000  |
| H | 4.240894000  | -10.680373000 | 2.387100000  |
| H | -1.084802000 | -2.982704000  | -2.081353000 |
| H | -2.703299000 | -3.408559000  | -2.701049000 |
| H | -2.343345000 | -3.524794000  | -0.952384000 |
| O | -1.086430000 | 1.695304000   | 3.257289000  |
| N | -3.582420000 | 4.346971000   | 5.411565000  |
| N | -3.378298000 | 2.390827000   | 4.263431000  |
| N | -2.798839000 | 3.519654000   | 4.723526000  |
| C | -0.622107000 | 2.864517000   | 3.769554000  |
| C | 0.728453000  | 3.184886000   | 3.569279000  |
| C | 1.267183000  | 4.365853000   | 4.072866000  |
| C | 0.480839000  | 5.277079000   | 4.798783000  |
| C | -0.863803000 | 4.966184000   | 5.003979000  |
| C | -1.420229000 | 3.783415000   | 4.499132000  |
| C | -4.657964000 | 2.485078000   | 4.701307000  |
| C | -4.780081000 | 3.709023000   | 5.425693000  |
| C | -5.993499000 | 4.082581000   | 6.047211000  |
| C | -7.050920000 | 3.194054000   | 5.925408000  |
| C | -5.753822000 | 1.604864000   | 4.563803000  |
| C | -6.934022000 | 1.976959000   | 5.193096000  |
| C | 1.054270000  | 6.575123000   | 5.305516000  |
| H | -2.071801000 | 1.662358000   | 3.462002000  |
| H | 1.335015000  | 2.483089000   | 2.993481000  |
| H | 2.321631000  | 4.600053000   | 3.904638000  |
| H | -1.508835000 | 5.645526000   | 5.559334000  |
| H | -6.071571000 | 5.024218000   | 6.593992000  |
| H | -8.009288000 | 3.429563000   | 6.390776000  |
| H | -5.681478000 | 0.683350000   | 3.984568000  |
| H | -7.799097000 | 1.315849000   | 5.116849000  |
| H | 0.577147000  | 7.423304000   | 4.789107000  |
| H | 2.138461000  | 6.629520000   | 5.129849000  |
| H | 0.865578000  | 6.701761000   | 6.385561000  |
| O | 6.377081000  | 3.705915000   | 2.906148000  |
| N | 8.872853000  | 1.053345000   | 0.752244000  |
| N | 8.668513000  | 3.009906000   | 1.901261000  |

|   |              |              |              |
|---|--------------|--------------|--------------|
| N | 8.089054000  | 1.881080000  | 1.441166000  |
| C | 5.912541000  | 2.535800000  | 2.394256000  |
| C | 4.561981000  | 2.215431000  | 2.594530000  |
| C | 4.023251000  | 1.034463000  | 2.090943000  |
| C | 4.809595000  | 0.123237000  | 1.365027000  |
| C | 6.154018000  | 0.434549000  | 1.160712000  |
| C | 6.710444000  | 1.617318000  | 1.665559000  |
| C | 9.948179000  | 2.915655000  | 1.463384000  |
| C | 10.070731000 | 1.692195000  | 0.737744000  |
| C | 11.283714000 | 1.318152000  | 0.117481000  |
| C | 12.341135000 | 2.206678000  | 0.239283000  |
| C | 11.044472000 | 3.796354000  | 1.599634000  |
| C | 12.224456000 | 3.423357000  | 0.970714000  |
| C | 4.236163000  | -1.174806000 | 0.858293000  |
| H | 7.362235000  | 3.737958000  | 2.701807000  |
| H | 3.955418000  | 2.917227000  | 3.170328000  |
| H | 2.968803000  | 0.800263000  | 2.259171000  |
| H | 6.799051000  | -0.244794000 | 0.605357000  |
| H | 11.362004000 | 0.376098000  | -0.430183000 |
| H | 13.299503000 | 1.971170000  | -0.226085000 |
| H | 10.971693000 | 4.717384000  | 2.180124000  |
| H | 13.089313000 | 4.084884000  | 1.047842000  |
| H | 4.713287000  | -2.022988000 | 1.374702000  |
| H | 3.152190000  | -1.228302000 | 1.033588000  |
| H | 4.424855000  | -1.301444000 | -0.221752000 |
| O | 2.484392000  | 4.985792000  | -5.995959000 |
| N | 3.885362000  | 7.185445000  | -2.664140000 |
| N | 3.937476000  | 5.246542000  | -3.859155000 |
| N | 3.453264000  | 6.498745000  | -3.720469000 |
| C | 2.073638000  | 6.257434000  | -5.748554000 |
| C | 1.155828000  | 6.839987000  | -6.633823000 |
| C | 0.691994000  | 8.138171000  | -6.433619000 |
| C | 1.123450000  | 8.908142000  | -5.339720000 |
| C | 2.035762000  | 8.335068000  | -4.453489000 |
| C | 2.514247000  | 7.031330000  | -4.645179000 |
| C | 4.754709000  | 5.098889000  | -2.787149000 |
| C | 4.714195000  | 6.312441000  | -2.037667000 |
| C | 5.435937000  | 6.461537000  | -0.831403000 |
| C | 6.173086000  | 5.364464000  | -0.411889000 |
| C | 5.532903000  | 4.000374000  | -2.357934000 |
| C | 6.223167000  | 4.155511000  | -1.163444000 |
| C | 0.653924000  | 10.326234000 | -5.147699000 |
| H | 3.163981000  | 4.759725000  | -5.288146000 |
| H | 0.831915000  | 6.246118000  | -7.490783000 |

|   |              |              |              |
|---|--------------|--------------|--------------|
| H | -0.021488000 | 8.576508000  | -7.135623000 |
| H | 2.397100000  | 8.896753000  | -3.593601000 |
| H | 5.397825000  | 7.398539000  | -0.272547000 |
| H | 6.744579000  | 5.422522000  | 0.515756000  |
| H | 5.597855000  | 3.079325000  | -2.940351000 |
| H | 6.827282000  | 3.323595000  | -0.796694000 |
| H | 1.501374000  | 11.021702000 | -5.264299000 |
| H | -0.117128000 | 10.595823000 | -5.883964000 |
| H | 0.242603000  | 10.478693000 | -4.134925000 |
| O | -5.808528000 | 5.119342000  | -0.775973000 |
| N | -3.312756000 | 2.466772000  | -2.929877000 |
| N | -3.517096000 | 4.423333000  | -1.780860000 |
| N | -4.096556000 | 3.294506000  | -2.240955000 |
| C | -6.273068000 | 3.949227000  | -1.287866000 |
| C | -7.623629000 | 3.628858000  | -1.087591000 |
| C | -8.162359000 | 2.447891000  | -1.591178000 |
| C | -7.376015000 | 1.536664000  | -2.317095000 |
| C | -6.031591000 | 1.847976000  | -2.521409000 |
| C | -5.475165000 | 3.030746000  | -2.016562000 |
| C | -2.237430000 | 4.329082000  | -2.218737000 |
| C | -2.114878000 | 3.105623000  | -2.944377000 |
| C | -0.901895000 | 2.731579000  | -3.564640000 |
| C | 0.155526000  | 3.620106000  | -3.442838000 |
| C | -1.141137000 | 5.209781000  | -2.082487000 |
| C | 0.038846000  | 4.836784000  | -2.711407000 |
| C | -7.949446000 | 0.238620000  | -2.823828000 |
| H | -4.823375000 | 5.151386000  | -0.980314000 |
| H | -8.230191000 | 4.330654000  | -0.511793000 |
| H | -9.216807000 | 2.213690000  | -1.422950000 |
| H | -5.386559000 | 1.168634000  | -3.076764000 |
| H | -0.823605000 | 1.789525000  | -4.112304000 |
| H | 1.113894000  | 3.384597000  | -3.908206000 |
| H | -1.213916000 | 6.130810000  | -1.501997000 |
| H | 0.903703000  | 5.498312000  | -2.634279000 |
| H | -7.472323000 | -0.609560000 | -2.307419000 |
| H | -9.033419000 | 0.185125000  | -2.648533000 |
| H | -7.760754000 | 0.111983000  | -3.903873000 |
| O | 7.658427000  | 1.259261000  | -2.273518000 |
| N | 10.154199000 | -1.393308000 | -4.427422000 |
| N | 9.949859000  | 0.563253000  | -3.278405000 |
| N | 9.370401000  | -0.565574000 | -3.738500000 |
| C | 7.193887000  | 0.089147000  | -2.785411000 |
| C | 5.843333000  | -0.231225000 | -2.585128000 |
| C | 5.304593000  | -1.412189000 | -3.088745000 |

|   |              |              |              |
|---|--------------|--------------|--------------|
| C | 6.090941000  | -2.323417000 | -3.814638000 |
| C | 7.435365000  | -2.012104000 | -4.018954000 |
| C | 7.991791000  | -0.829334000 | -3.514107000 |
| C | 11.229526000 | 0.469002000  | -3.716281000 |
| C | 11.352078000 | -0.754458000 | -4.441922000 |
| C | 12.565061000 | -1.128501000 | -5.062185000 |
| C | 13.622482000 | -0.239974000 | -4.940383000 |
| C | 12.325819000 | 1.349701000  | -3.580032000 |
| C | 13.505803000 | 0.976703000  | -4.208952000 |
| C | 5.517509000  | -3.621460000 | -4.321373000 |
| H | 8.643580000  | 1.291306000  | -2.477859000 |
| H | 5.236751000  | 0.470580000  | -2.009344000 |
| H | 4.250137000  | -1.646375000 | -2.920465000 |
| H | 8.080397000  | -2.691447000 | -4.574309000 |
| H | 12.643351000 | -2.070556000 | -5.609849000 |
| H | 14.580850000 | -0.475484000 | -5.405751000 |
| H | 12.253040000 | 2.270730000  | -2.999542000 |
| H | 14.370659000 | 1.638232000  | -4.131824000 |
| H | 5.994634000  | -4.469641000 | -3.804964000 |
| H | 4.433537000  | -3.674955000 | -4.146078000 |
| H | 5.706201000  | -3.748097000 | -5.401418000 |
| O | 1.203017000  | 7.432396000  | -0.816282000 |
| N | 2.604015000  | 9.632099000  | 2.515525000  |
| N | 2.656130000  | 7.693194000  | 1.320511000  |
| N | 2.171917000  | 8.945398000  | 1.459197000  |
| C | 0.792297000  | 8.704090000  | -0.568892000 |
| C | -0.125519000 | 9.286640000  | -1.454157000 |
| C | -0.589352000 | 10.584824000 | -1.253953000 |
| C | -0.157897000 | 11.354796000 | -0.160054000 |
| C | 0.754415000  | 10.781721000 | 0.726177000  |
| C | 1.232900000  | 9.477983000  | 0.534487000  |
| C | 3.473362000  | 7.545542000  | 2.392516000  |
| C | 3.432848000  | 8.759095000  | 3.141999000  |
| C | 4.154590000  | 8.908190000  | 4.348263000  |
| C | 4.891739000  | 7.811117000  | 4.767777000  |
| C | 4.251557000  | 6.447027000  | 2.821732000  |
| C | 4.941820000  | 6.602165000  | 4.016222000  |
| C | -0.627423000 | 12.772886000 | 0.031967000  |
| H | 1.882663000  | 7.206406000  | -0.108477000 |
| H | -0.449432000 | 8.692771000  | -2.311117000 |
| H | -1.302834000 | 11.023162000 | -1.955958000 |
| H | 1.115753000  | 11.343407000 | 1.586064000  |
| H | 4.116478000  | 9.845193000  | 4.907118000  |
| H | 5.463233000  | 7.869175000  | 5.695422000  |



|   |               |              |              |
|---|---------------|--------------|--------------|
| H | 4.316508000   | 5.525979000  | 2.239315000  |
| H | 5.545935000   | 5.770248000  | 4.382972000  |
| H | 0.220028000   | 13.468356000 | -0.084634000 |
| H | -1.398475000  | 13.042476000 | -0.704298000 |
| H | -1.038744000  | 12.925347000 | 1.044740000  |
| O | -7.089875000  | 7.565995000  | 4.403693000  |
| N | -4.594103000  | 4.913425000  | 2.249789000  |
| N | -4.798443000  | 6.869986000  | 3.398806000  |
| N | -5.377901000  | 5.741160000  | 2.938710000  |
| C | -7.554415000  | 6.395880000  | 3.891800000  |
| C | -8.904975000  | 6.075511000  | 4.092075000  |
| C | -9.443706000  | 4.894543000  | 3.588488000  |
| C | -8.657364000  | 3.983323000  | 2.862563000  |
| C | -7.313004000  | 4.294385000  | 2.658479000  |
| C | -6.756524000  | 5.477425000  | 3.163058000  |
| C | -3.518777000  | 6.775735000  | 2.960929000  |
| C | -3.396221000  | 5.552270000  | 2.235298000  |
| C | -2.183255000  | 5.178246000  | 1.615001000  |
| C | -1.125819000  | 6.066757000  | 1.736833000  |
| C | -2.422484000  | 7.656435000  | 3.097178000  |
| C | -1.242501000  | 7.283437000  | 2.468258000  |
| C | -9.230793000  | 2.685274000  | 2.355838000  |
| H | -6.104722000  | 7.598039000  | 4.199352000  |
| H | -9.511537000  | 6.777307000  | 4.667873000  |
| H | -10.498154000 | 4.660343000  | 3.756716000  |
| H | -6.667782000  | 3.615525000  | 2.102698000  |
| H | -2.104957000  | 4.236176000  | 1.067378000  |
| H | -0.167452000  | 5.831250000  | 1.271460000  |
| H | -2.495263000  | 8.577464000  | 3.677668000  |
| H | -0.377644000  | 7.944965000  | 2.545387000  |
| H | -8.753670000  | 1.837092000  | 2.872246000  |
| H | -10.314766000 | 2.631778000  | 2.531132000  |
| H | -9.042101000  | 2.558636000  | 1.275793000  |

S<sub>1</sub> (enol)

|   |              |              |              |
|---|--------------|--------------|--------------|
| O | 0.132237000  | -0.830408000 | -1.855169000 |
| N | -2.318388000 | 1.708799000  | 0.365588000  |
| N | -2.094780000 | -0.199645000 | -0.926231000 |
| N | -1.501003000 | 0.926788000  | -0.389093000 |
| C | 0.635408000  | 0.294184000  | -1.381214000 |
| C | 1.980545000  | 0.609632000  | -1.621732000 |
| C | 2.532855000  | 1.768543000  | -1.105866000 |
| C | 1.752834000  | 2.649017000  | -0.326148000 |
| C | 0.414344000  | 2.337435000  | -0.052703000 |

|   |              |              |              |
|---|--------------|--------------|--------------|
| C | -0.177562000 | 1.202156000  | -0.588680000 |
| C | -3.356150000 | -0.139065000 | -0.466933000 |
| C | -3.483291000 | 1.044424000  | 0.338226000  |
| C | -4.697949000 | 1.350418000  | 0.985409000  |
| C | -5.741327000 | 0.455589000  | 0.832321000  |
| C | -4.449121000 | -1.000717000 | -0.655969000 |
| C | -5.620935000 | -0.696725000 | 0.017851000  |
| C | 2.328136000  | 3.941884000  | 0.155313000  |
| H | -0.893354000 | -0.824909000 | -1.632308000 |
| H | 2.553700000  | -0.078502000 | -2.231170000 |
| H | 3.571781000  | 2.014160000  | -1.289285000 |
| H | -0.187654000 | 2.989382000  | 0.562691000  |
| H | -4.777763000 | 2.255833000  | 1.576657000  |
| H | -6.678178000 | 0.626106000  | 1.350732000  |
| H | -4.391033000 | -1.863135000 | -1.307040000 |
| H | -6.459678000 | -1.369501000 | -0.108750000 |
| H | 2.001525000  | 4.753696000  | -0.504653000 |
| H | 3.418732000  | 3.923347000  | 0.158886000  |
| H | 1.965333000  | 4.186157000  | 1.156954000  |
| O | 4.088440000  | -2.031768000 | 6.979383000  |
| N | 2.687224000  | -4.230986000 | 3.648447000  |
| N | 2.635351000  | -2.292498000 | 4.842578000  |
| N | 3.119548000  | -3.544708000 | 4.703892000  |
| C | 4.498958000  | -3.302999000 | 6.732860000  |
| C | 5.416978000  | -3.885980000 | 7.617247000  |
| C | 5.880577000  | -5.183754000 | 7.417925000  |
| C | 5.449329000  | -5.954137000 | 6.323144000  |
| C | 4.537242000  | -5.380148000 | 5.436540000  |
| C | 4.058557000  | -4.077305000 | 5.628602000  |
| C | 1.817904000  | -2.144419000 | 3.771455000  |
| C | 1.858617000  | -3.358387000 | 3.021091000  |
| C | 1.136656000  | -3.507057000 | 1.815709000  |
| C | 0.399740000  | -2.410391000 | 1.395313000  |
| C | 1.039722000  | -1.045892000 | 3.342239000  |
| C | 0.349457000  | -1.201021000 | 2.147749000  |
| C | 5.918837000  | -7.372233000 | 6.131122000  |
| H | 3.408852000  | -1.805692000 | 6.271569000  |
| H | 5.740899000  | -3.292116000 | 8.474206000  |
| H | 6.594272000  | -5.622518000 | 8.119047000  |
| H | 4.175679000  | -5.942731000 | 4.577025000  |
| H | 1.174974000  | -4.444476000 | 1.255971000  |
| H | -0.171754000 | -2.468441000 | 0.467667000  |
| H | 0.975002000  | -0.125260000 | 3.923774000  |
| H | -0.254428000 | -0.369512000 | 1.780117000  |

|   |               |              |              |
|---|---------------|--------------|--------------|
| H | 5.071377000   | -8.067691000 | 6.247723000  |
| H | 6.689885000   | -7.641833000 | 6.867387000  |
| H | 6.329938000   | -7.524282000 | 5.119231000  |
| O | -8.097151000  | -0.618181000 | 3.297262000  |
| N | -9.498368000  | -2.817398000 | -0.033675000 |
| N | -9.550240000  | -0.878909000 | 1.160457000  |
| N | -9.066043000  | -2.131120000 | 1.021771000  |
| C | -7.686633000  | -1.889410000 | 3.050739000  |
| C | -6.768612000  | -2.472391000 | 3.935126000  |
| C | -6.305014000  | -3.770165000 | 3.735804000  |
| C | -6.736261000  | -4.540548000 | 2.641023000  |
| C | -7.648349000  | -3.966560000 | 1.754419000  |
| C | -8.127033000  | -2.663717000 | 1.946481000  |
| C | -10.367688000 | -0.730830000 | 0.089334000  |
| C | -10.326972000 | -1.944800000 | -0.661030000 |
| C | -11.048934000 | -2.093469000 | -1.866412000 |
| C | -11.785850000 | -0.996803000 | -2.286808000 |
| C | -11.145868000 | 0.367696000  | -0.339882000 |
| C | -11.836133000 | 0.212567000  | -1.534372000 |
| C | -6.266754000  | -5.958645000 | 2.449001000  |
| H | -8.776738000  | -0.392104000 | 2.589448000  |
| H | -6.444691000  | -1.878527000 | 4.792085000  |
| H | -5.591320000  | -4.208929000 | 4.436926000  |
| H | -8.009911000  | -4.529143000 | 0.894904000  |
| H | -11.010616000 | -3.030889000 | -2.426150000 |
| H | -12.357344000 | -1.054852000 | -3.214454000 |
| H | -11.210589000 | 1.288330000  | 0.241653000  |
| H | -12.440019000 | 1.044075000  | -1.902004000 |
| H | -7.114213000  | -6.654104000 | 2.565602000  |
| H | -5.495706000  | -6.228245000 | 3.185266000  |
| H | -5.855653000  | -6.110694000 | 1.437110000  |
| O | -1.382351000  | -6.571089000 | 2.366780000  |
| N | 0.018867000   | -4.371871000 | 5.697717000  |
| N | 0.070954000   | -6.309457000 | 4.503212000  |
| N | -0.413460000  | -5.058148000 | 4.642270000  |
| C | -1.792869000  | -5.299859000 | 2.613303000  |
| C | -2.710455000  | -4.716392000 | 1.727661000  |
| C | -3.174488000  | -3.419104000 | 1.928238000  |
| C | -2.743023000  | -2.649137000 | 3.022137000  |
| C | -1.830936000  | -3.221807000 | 3.909251000  |
| C | -1.352251000  | -4.524649000 | 3.717188000  |
| C | 0.888184000   | -6.458438000 | 5.574708000  |
| C | 0.847471000   | -5.244469000 | 6.325072000  |
| C | 1.569649000   | -5.094897000 | 7.530082000  |

|   |              |               |              |
|---|--------------|---------------|--------------|
| C | 2.306566000  | -6.191563000  | 7.950478000  |
| C | 1.666366000  | -7.556965000  | 6.003924000  |
| C | 2.356849000  | -7.400934000  | 7.198041000  |
| C | -3.212531000 | -1.229721000  | 3.214668000  |
| H | -0.702328000 | -6.796679000  | 3.073339000  |
| H | -3.034593000 | -5.309839000  | 0.871584000  |
| H | -3.887965000 | -2.980756000  | 1.226234000  |
| H | -1.469591000 | -2.660127000  | 4.769138000  |
| H | 1.531331000  | -4.157478000  | 8.089820000  |
| H | 2.877842000  | -6.134416000  | 8.878496000  |
| H | 1.731304000  | -8.476696000  | 5.422016000  |
| H | 2.960518000  | -8.233344000  | 7.566046000  |
| H | -2.365071000 | -0.535583000  | 3.097558000  |
| H | -3.983578000 | -0.961440000  | 2.477893000  |
| H | -3.623632000 | -1.077672000  | 4.226559000  |
| O | 5.369754000  | -4.478439000  | 1.799717000  |
| N | 3.968537000  | -6.677656000  | -1.531220000 |
| N | 3.916665000  | -4.739169000  | -0.337087000 |
| N | 4.400863000  | -5.991379000  | -0.475773000 |
| C | 5.780273000  | -5.749668000  | 1.553194000  |
| C | 6.698292000  | -6.332650000  | 2.437581000  |
| C | 7.161891000  | -7.630423000  | 2.238259000  |
| C | 6.730644000  | -8.400806000  | 1.143478000  |
| C | 5.818556000  | -7.826819000  | 0.256874000  |
| C | 5.339871000  | -6.523976000  | 0.448936000  |
| C | 3.099218000  | -4.591088000  | -1.408211000 |
| C | 3.139932000  | -5.805058000  | -2.158575000 |
| C | 2.417971000  | -5.953728000  | -3.363957000 |
| C | 1.681076000  | -4.857052000  | -3.784366000 |
| C | 2.320988000  | -3.492584000  | -1.837395000 |
| C | 1.630944000  | -3.647598000  | -3.031991000 |
| C | 7.200152000  | -9.818904000  | 0.951456000  |
| H | 4.690167000  | -4.252363000  | 1.091903000  |
| H | 7.022213000  | -5.738787000  | 3.294540000  |
| H | 7.875585000  | -8.069188000  | 2.939381000  |
| H | 5.456994000  | -8.389401000  | -0.602641000 |
| H | 2.456289000  | -6.891147000  | -3.923695000 |
| H | 1.109561000  | -4.915111000  | -4.711999000 |
| H | 2.256317000  | -2.571930000  | -1.255891000 |
| H | 1.026751000  | -2.816408000  | -3.399478000 |
| H | 6.352692000  | -10.514362000 | 1.068057000  |
| H | 7.971199000  | -10.088503000 | 1.687721000  |
| H | 7.611253000  | -9.970952000  | -0.060435000 |
| O | -6.815842000 | -3.064835000  | -1.882361000 |

|   |               |              |              |
|---|---------------|--------------|--------------|
| N | -8.217055000  | -5.264069000 | -5.213341000 |
| N | -8.268925000  | -3.325580000 | -4.019208000 |
| N | -7.784729000  | -4.577791000 | -4.157894000 |
| C | -6.405313000  | -4.336078000 | -2.128927000 |
| C | -5.487297000  | -4.919062000 | -1.244540000 |
| C | -5.023699000  | -6.216835000 | -1.443862000 |
| C | -5.454947000  | -6.987219000 | -2.538643000 |
| C | -6.367034000  | -6.413231000 | -3.425247000 |
| C | -6.845719000  | -5.110388000 | -3.233185000 |
| C | -9.086373000  | -3.177501000 | -5.090332000 |
| C | -9.045658000  | -4.391470000 | -5.840696000 |
| C | -9.767619000  | -4.540140000 | -7.046078000 |
| C | -10.504536000 | -3.443474000 | -7.466474000 |
| C | -9.864554000  | -2.078974000 | -5.519547000 |
| C | -10.554820000 | -2.234103000 | -6.714038000 |
| C | -4.985439000  | -8.405316000 | -2.730665000 |
| H | -7.495416000  | -2.838778000 | -2.590226000 |
| H | -5.163377000  | -4.325198000 | -0.387581000 |
| H | -4.310005000  | -6.655600000 | -0.742740000 |
| H | -6.728596000  | -6.975813000 | -4.284762000 |
| H | -9.729302000  | -5.477559000 | -7.605816000 |
| H | -11.076030000 | -3.501523000 | -8.394120000 |
| H | -9.929274000  | -1.158341000 | -4.938012000 |
| H | -11.158705000 | -1.402595000 | -7.081670000 |
| H | -5.832900000  | -9.100773000 | -2.614064000 |
| H | -4.214391000  | -8.674916000 | -1.994400000 |
| H | -4.574338000  | -8.557365000 | -3.742556000 |
| O | 1.477299000   | -3.197607000 | -7.102763000 |
| N | -1.018655000  | -0.545907000 | -4.948486000 |
| N | -0.814559000  | -2.502054000 | -6.096621000 |
| N | -0.235086000  | -1.373236000 | -5.636526000 |
| C | 1.941637000   | -2.028401000 | -6.590498000 |
| C | 3.292201000   | -1.708049000 | -6.790773000 |
| C | 3.830948000   | -0.527089000 | -6.287186000 |
| C | 3.044615000   | 0.384147000  | -5.561269000 |
| C | 1.699970000   | 0.073270000  | -5.356072000 |
| C | 1.143527000   | -1.109492000 | -5.860919000 |
| C | -2.094225000  | -2.407786000 | -5.658744000 |
| C | -2.216325000  | -1.183839000 | -4.934358000 |
| C | -3.429739000  | -0.810265000 | -4.312841000 |
| C | -4.487172000  | -1.698777000 | -4.434643000 |
| C | -3.190094000  | -3.287985000 | -5.796249000 |
| C | -4.370290000  | -2.915874000 | -5.166956000 |
| C | 3.618064000   | 1.682184000  | -5.054535000 |

|   |              |               |              |
|---|--------------|---------------|--------------|
| H | 0.491928000  | -3.230540000  | -6.898049000 |
| H | 3.898754000  | -2.409854000  | -7.366571000 |
| H | 4.885399000  | -0.292903000  | -6.455413000 |
| H | 1.054947000  | 0.752621000   | -4.800717000 |
| H | -3.507797000 | 0.131373000   | -3.766060000 |
| H | -5.445536000 | -1.463257000  | -3.969275000 |
| H | -3.117762000 | -4.209502000  | -6.375484000 |
| H | -5.235372000 | -3.576973000  | -5.243202000 |
| H | 3.140952000  | 2.530371000   | -5.570944000 |
| H | 4.702255000  | 1.736567000   | -5.230203000 |
| H | 3.429374000  | 1.808823000   | -3.974490000 |
| O | -0.101036000 | -9.017758000  | -2.812886000 |
| N | 1.300181000  | -6.818541000  | 0.518051000  |
| N | 1.352268000  | -8.756128000  | -0.676454000 |
| N | 0.867855000  | -7.504819000  | -0.537395000 |
| C | -0.511556000 | -7.746529000  | -2.566363000 |
| C | -1.429140000 | -7.163062000  | -3.452004000 |
| C | -1.893174000 | -5.865774000  | -3.251428000 |
| C | -1.461703000 | -5.095811000  | -2.157501000 |
| C | -0.549623000 | -5.668477000  | -1.270415000 |
| C | -0.070936000 | -6.971319000  | -1.462477000 |
| C | 2.169499000  | -8.905109000  | 0.395042000  |
| C | 2.128785000  | -7.691139000  | 1.145407000  |
| C | 2.850964000  | -7.541568000  | 2.350416000  |
| C | 3.587881000  | -8.638234000  | 2.770812000  |
| C | 2.947681000  | -10.003635000 | 0.824258000  |
| C | 3.638164000  | -9.847604000  | 2.018375000  |
| C | -1.931194000 | -3.676391000  | -1.964828000 |
| H | 0.578987000  | -9.243350000  | -2.106327000 |
| H | -1.753279000 | -7.756510000  | -4.308081000 |
| H | -2.606650000 | -5.427427000  | -3.953432000 |
| H | -0.188277000 | -5.106796000  | -0.410528000 |
| H | 2.812646000  | -6.604148000  | 2.910154000  |
| H | 4.159156000  | -8.581087000  | 3.698830000  |
| H | 3.012618000  | -10.923366000 | 0.242350000  |
| H | 4.241831000  | -10.680014000 | 2.386380000  |
| H | -1.083754000 | -2.981954000  | -2.082317000 |
| H | -2.702238000 | -3.408149000  | -2.701813000 |
| H | -2.342330000 | -3.524330000  | -0.953113000 |
| O | -1.085330000 | 1.695734000   | 3.256569000  |
| N | -3.581285000 | 4.347434000   | 5.410845000  |
| N | -3.377189000 | 2.391287000   | 4.262711000  |
| N | -2.797715000 | 3.520106000   | 4.722806000  |
| C | -0.620986000 | 2.864931000   | 3.768851000  |

|   |              |              |             |
|---|--------------|--------------|-------------|
| C | 0.729571000  | 3.185298000  | 3.568550000 |
| C | 1.268314000  | 4.366260000  | 4.072131000 |
| C | 0.481987000  | 5.277488000  | 4.798063000 |
| C | -0.862659000 | 4.966611000  | 5.003259000 |
| C | -1.419101000 | 3.783849000  | 4.498412000 |
| C | -4.656853000 | 2.485555000  | 4.700587000 |
| C | -4.778954000 | 3.709501000  | 5.424973000 |
| C | -5.992367000 | 4.083076000  | 6.046491000 |
| C | -7.049800000 | 3.194563000  | 5.924688000 |
| C | -5.752723000 | 1.605355000  | 4.563083000 |
| C | -6.932918000 | 1.977466000  | 5.192376000 |
| C | 1.055435000  | 6.575524000  | 5.304796000 |
| H | -2.070701000 | 1.662801000  | 3.461282000 |
| H | 1.336086000  | 2.483496000  | 2.992728000 |
| H | 2.322770000  | 4.600438000  | 3.903918000 |
| H | -1.507682000 | 5.645961000  | 5.558614000 |
| H | -6.070427000 | 5.024714000  | 6.593272000 |
| H | -8.008165000 | 3.430084000  | 6.390056000 |
| H | -5.680391000 | 0.683840000  | 3.983848000 |
| H | -7.798002000 | 1.316367000  | 5.116129000 |
| H | 0.578323000  | 7.423712000  | 4.788387000 |
| H | 2.139627000  | 6.629907000  | 5.129129000 |
| H | 0.866745000  | 6.702165000  | 6.384841000 |
| O | 6.378208000  | 3.706246000  | 2.905428000 |
| N | 8.873945000  | 1.053643000  | 0.751524000 |
| N | 8.669631000  | 3.010207000  | 1.900541000 |
| N | 8.090157000  | 1.881388000  | 1.440446000 |
| C | 5.913652000  | 2.536137000  | 2.393536000 |
| C | 4.563088000  | 2.215786000  | 2.593810000 |
| C | 4.024338000  | 1.034830000  | 2.090201000 |
| C | 4.810675000  | 0.123589000  | 1.364307000 |
| C | 6.155102000  | 0.434883000  | 1.159992000 |
| C | 6.711543000  | 1.617644000  | 1.664839000 |
| C | 9.949295000  | 2.915939000  | 1.462664000 |
| C | 10.071831000 | 1.692477000  | 0.737024000 |
| C | 11.284809000 | 1.318418000  | 0.116761000 |
| C | 12.342242000 | 2.206930000  | 0.238563000 |
| C | 11.045600000 | 3.796623000  | 1.598914000 |
| C | 12.225579000 | 3.423611000  | 0.969994000 |
| C | 4.237225000  | -1.174447000 | 0.857573000 |
| H | 7.363362000  | 3.738276000  | 2.701087000 |
| H | 3.956534000  | 2.917590000  | 3.169608000 |
| H | 2.969905000  | 0.800640000  | 2.258480000 |
| H | 6.800126000  | -0.244469000 | 0.604637000 |

|   |              |              |              |
|---|--------------|--------------|--------------|
| H | 11.363087000 | 0.376363000  | -0.430903000 |
| H | 13.300607000 | 1.971409000  | -0.226805000 |
| H | 10.972833000 | 4.717654000  | 2.179404000  |
| H | 13.090445000 | 4.085126000  | 1.047122000  |
| H | 4.714338000  | -2.022635000 | 1.373982000  |
| H | 3.153252000  | -1.227928000 | 1.032868000  |
| H | 4.425916000  | -1.301087000 | -0.222472000 |
| O | 2.485536000  | 4.986174000  | -5.996679000 |
| N | 3.886535000  | 7.185809000  | -2.664860000 |
| N | 3.938623000  | 5.246905000  | -3.859875000 |
| N | 3.454428000  | 6.499115000  | -3.721189000 |
| C | 2.074799000  | 6.257822000  | -5.749274000 |
| C | 1.156996000  | 6.840387000  | -6.634543000 |
| C | 0.693180000  | 8.138577000  | -6.434339000 |
| C | 1.124646000  | 8.908542000  | -5.340440000 |
| C | 2.036950000  | 8.335456000  | -4.454209000 |
| C | 2.515418000  | 7.031712000  | -4.645899000 |
| C | 4.755854000  | 5.099241000  | -2.787869000 |
| C | 4.715356000  | 6.312794000  | -2.038387000 |
| C | 5.437100000  | 6.461880000  | -0.832123000 |
| C | 6.174235000  | 5.364798000  | -0.412609000 |
| C | 5.534034000  | 4.000716000  | -2.358654000 |
| C | 6.224300000  | 4.155844000  | -1.164164000 |
| C | 0.655138000  | 10.326641000 | -5.148419000 |
| H | 3.165122000  | 4.760098000  | -5.288866000 |
| H | 0.833075000  | 6.246522000  | -7.491503000 |
| H | -0.020297000 | 8.576924000  | -7.136343000 |
| H | 2.398296000  | 8.897137000  | -3.594321000 |
| H | 5.399001000  | 7.398883000  | -0.273267000 |
| H | 6.745729000  | 5.422848000  | 0.515036000  |
| H | 5.598974000  | 3.079666000  | -2.941071000 |
| H | 6.828404000  | 3.323920000  | -0.797414000 |
| H | 1.502598000  | 11.022097000 | -5.265019000 |
| H | -0.115910000 | 10.596240000 | -5.884684000 |
| H | 0.243819000  | 10.479105000 | -4.135645000 |
| O | -5.807382000 | 5.119834000  | -0.776693000 |
| N | -3.311645000 | 2.467231000  | -2.930597000 |
| N | -3.515960000 | 4.423795000  | -1.781580000 |
| N | -4.095435000 | 3.294975000  | -2.241675000 |
| C | -6.271938000 | 3.949725000  | -1.288586000 |
| C | -7.622503000 | 3.629374000  | -1.088311000 |
| C | -8.161249000 | 2.448414000  | -1.591898000 |
| C | -7.374917000 | 1.537177000  | -2.317815000 |
| C | -6.030489000 | 1.848471000  | -2.522129000 |



|   |              |              |              |
|---|--------------|--------------|--------------|
| C | -5.474047000 | 3.031234000  | -2.017282000 |
| C | -2.236295000 | 4.329527000  | -2.219457000 |
| C | -2.113759000 | 3.106066000  | -2.945097000 |
| C | -0.900781000 | 2.732006000  | -3.565360000 |
| C | 0.156650000  | 3.620522000  | -3.443562000 |
| C | -1.139988000 | 5.210207000  | -2.083200000 |
| C | 0.039988000  | 4.837200000  | -2.712137000 |
| C | -7.948369000 | 0.239134000  | -2.824556000 |
| H | -4.822229000 | 5.151865000  | -0.981034000 |
| H | -8.229056000 | 4.331178000  | -0.512513000 |
| H | -9.215700000 | 2.214227000  | -1.423670000 |
| H | -5.385466000 | 1.169120000  | -3.077484000 |
| H | -0.822503000 | 1.789951000  | -4.113024000 |
| H | 1.115017000  | 3.384998000  | -3.908926000 |
| H | -1.212757000 | 6.131241000  | -1.502717000 |
| H | 0.904789000  | 5.498736000  | -2.634970000 |
| H | -7.471239000 | -0.609035000 | -2.308153000 |
| H | -9.032338000 | 0.185662000  | -2.649250000 |
| H | -7.759681000 | 0.112497000  | -3.904594000 |
| O | 7.659522000  | 1.259575000  | -2.274238000 |
| N | 10.155258000 | -1.393027000 | -4.428142000 |
| N | 9.950944000  | 0.563537000  | -3.279125000 |
| N | 9.371471000  | -0.565283000 | -3.739220000 |
| C | 7.194963000  | 0.089471000  | -2.786143000 |
| C | 5.844443000  | -0.230867000 | -2.585834000 |
| C | 5.305637000  | -1.411811000 | -3.089502000 |
| C | 6.091979000  | -2.323064000 | -3.815391000 |
| C | 7.436416000  | -2.011787000 | -4.019674000 |
| C | 7.992858000  | -0.829024000 | -3.514827000 |
| C | 11.230610000 | 0.469269000  | -3.717001000 |
| C | 11.353146000 | -0.754193000 | -4.442642000 |
| C | 12.566124000 | -1.128252000 | -5.062905000 |
| C | 13.623557000 | -0.239739000 | -4.941103000 |
| C | 12.326915000 | 1.349953000  | -3.580752000 |
| C | 13.506894000 | 0.976940000  | -4.209672000 |
| C | 5.518539000  | -3.621118000 | -4.322093000 |
| H | 8.644675000  | 1.291607000  | -2.478579000 |
| H | 5.237775000  | 0.470884000  | -2.010032000 |
| H | 4.251189000  | -1.646077000 | -2.921081000 |
| H | 8.081439000  | -2.691139000 | -4.575029000 |
| H | 12.644401000 | -2.070308000 | -5.610569000 |
| H | 14.581922000 | -0.475262000 | -5.406471000 |
| H | 12.254148000 | 2.270983000  | -3.000262000 |
| H | 14.371759000 | 1.638457000  | -4.132544000 |

|   |              |              |              |
|---|--------------|--------------|--------------|
| H | 5.995653000  | -4.469305000 | -3.805684000 |
| H | 4.434566000  | -3.674598000 | -4.146798000 |
| H | 5.707229000  | -3.747757000 | -5.402138000 |
| O | 1.204219000  | 7.432812000  | -0.817021000 |
| N | 2.605220000  | 9.632480000  | 2.514805000  |
| N | 2.657310000  | 7.693574000  | 1.319791000  |
| N | 2.173113000  | 8.945785000  | 1.458477000  |
| C | 0.793494000  | 8.704496000  | -0.569615000 |
| C | -0.124318000 | 9.287057000  | -1.454877000 |
| C | -0.588134000 | 10.585247000 | -1.254673000 |
| C | -0.156669000 | 11.355213000 | -0.160774000 |
| C | 0.755635000  | 10.782126000 | 0.725457000  |
| C | 1.234103000  | 9.478382000  | 0.533767000  |
| C | 3.474540000  | 7.545911000  | 2.391796000  |
| C | 3.434042000  | 8.759465000  | 3.141279000  |
| C | 4.155786000  | 8.908550000  | 4.347543000  |
| C | 4.892920000  | 7.811468000  | 4.767057000  |
| C | 4.252720000  | 6.447386000  | 2.821012000  |
| C | 4.942985000  | 6.602515000  | 4.015502000  |
| C | -0.626176000 | 12.773310000 | 0.031247000  |
| H | 1.883845000  | 7.206688000  | -0.109200000 |
| H | -0.448239000 | 8.693192000  | -2.311837000 |
| H | -1.301610000 | 11.023594000 | -1.956678000 |
| H | 1.116981000  | 11.343807000 | 1.585344000  |
| H | 4.117686000  | 9.845554000  | 4.906398000  |
| H | 5.464415000  | 7.869518000  | 5.694702000  |
| H | 4.317659000  | 5.526337000  | 2.238595000  |
| H | 5.547089000  | 5.770590000  | 4.382252000  |
| H | 0.221284000  | 13.468768000 | -0.085354000 |
| H | -1.397225000 | 13.042910000 | -0.705018000 |
| H | -1.037495000 | 12.925776000 | 1.044020000  |
| O | -7.088697000 | 7.566504000  | 4.402973000  |
| N | -4.592960000 | 4.913901000  | 2.249069000  |
| N | -4.797274000 | 6.870465000  | 3.398086000  |
| N | -5.376747000 | 5.741646000  | 2.937990000  |
| C | -7.553253000 | 6.396395000  | 3.891080000  |
| C | -8.903817000 | 6.076044000  | 4.091355000  |
| C | -9.442563000 | 4.895083000  | 3.587768000  |
| C | -8.656234000 | 3.983855000  | 2.861840000  |
| C | -7.311855000 | 4.294924000  | 2.657743000  |
| C | -6.755373000 | 5.477928000  | 3.162342000  |
| C | -3.517610000 | 6.776197000  | 2.960209000  |
| C | -3.395064000 | 5.552721000  | 2.234594000  |
| C | -2.182117000 | 5.178686000  | 1.614287000  |

|   |               |             |             |
|---|---------------|-------------|-------------|
| C | -1.124663000  | 6.067191000 | 1.736106000 |
| C | -2.421305000  | 7.656882000 | 3.096458000 |
| C | -1.241327000  | 7.283869000 | 2.467538000 |
| C | -9.229680000  | 2.685811000 | 2.355118000 |
| H | -6.103544000  | 7.598535000 | 4.198632000 |
| H | -9.510369000  | 6.777848000 | 4.667153000 |
| H | -10.497014000 | 4.660897000 | 3.755996000 |
| H | -6.666678000  | 3.615995000 | 2.101991000 |
| H | -2.103775000  | 4.236541000 | 1.066659000 |
| H | -0.166297000  | 5.831667000 | 1.270740000 |
| H | -2.494072000  | 8.577912000 | 3.676948000 |
| H | -0.376461000  | 7.945385000 | 2.544667000 |
| H | -8.752568000  | 1.837623000 | 2.871526000 |
| H | -10.313653000 | 2.632330000 | 2.530412000 |
| H | -9.040989000  | 2.559171000 | 1.275073000 |

S<sub>1</sub> (keto)

|   |              |              |              |
|---|--------------|--------------|--------------|
| O | 0.227985000  | -1.056297000 | -1.493701000 |
| N | -2.275056000 | 1.507767000  | 0.482483000  |
| N | -2.195012000 | -0.087568000 | -1.094443000 |
| N | -1.482707000 | 0.770414000  | -0.289131000 |
| C | 0.678559000  | 0.136865000  | -1.265671000 |
| C | 1.989812000  | 0.536797000  | -1.583773000 |
| C | 2.517091000  | 1.770812000  | -1.159373000 |
| C | 1.738496000  | 2.674118000  | -0.475802000 |
| C | 0.358032000  | 2.340104000  | -0.255016000 |
| C | -0.130867000 | 1.131302000  | -0.616680000 |
| C | -3.454483000 | -0.111793000 | -0.579402000 |
| C | -3.492917000 | 0.955855000  | 0.358715000  |
| C | -4.685167000 | 1.262513000  | 1.050174000  |
| C | -5.758806000 | 0.422514000  | 0.846759000  |
| C | -4.554611000 | -0.940878000 | -0.797757000 |
| C | -5.689439000 | -0.672435000 | -0.047431000 |
| C | 2.266114000  | 3.975200000  | 0.040690000  |
| H | -1.602918000 | -0.841873000 | -1.480335000 |
| H | 2.610752000  | -0.176810000 | -2.111986000 |
| H | 3.560528000  | 2.003085000  | -1.341226000 |
| H | -0.290012000 | 3.050149000  | 0.241085000  |
| H | -4.713456000 | 2.109388000  | 1.726347000  |
| H | -6.674526000 | 0.574370000  | 1.406380000  |
| H | -4.536869000 | -1.763584000 | -1.499252000 |
| H | -6.533793000 | -1.337774000 | -0.170599000 |
| H | 1.758870000  | 4.815505000  | -0.444152000 |
| H | 3.339303000  | 4.067695000  | -0.130704000 |

|   |               |              |              |
|---|---------------|--------------|--------------|
| H | 2.076620000   | 4.074375000  | 1.114942000  |
| O | 4.090164000   | -2.032190000 | 6.978770000  |
| N | 2.687667000   | -4.229787000 | 3.647304000  |
| N | 2.636701000   | -2.291664000 | 4.842067000  |
| N | 3.120393000   | -3.544019000 | 4.702915000  |
| C | 4.500155000   | -3.303502000 | 6.731785000  |
| C | 5.418062000   | -3.887125000 | 7.615867000  |
| C | 5.881129000   | -5.185015000 | 7.416067000  |
| C | 5.449442000   | -5.954876000 | 6.321093000  |
| C | 4.537465000   | -5.380246000 | 5.434790000  |
| C | 4.059312000   | -4.077280000 | 5.627333000  |
| C | 1.819176000   | -2.142921000 | 3.771096000  |
| C | 1.859321000   | -3.356664000 | 3.020335000  |
| C | 1.137149000   | -3.504663000 | 1.814997000  |
| C | 0.400605000   | -2.407574000 | 1.395049000  |
| C | 1.041367000   | -1.043954000 | 3.342334000  |
| C | 0.350889000   | -1.198429000 | 2.147882000  |
| C | 5.918373000   | -7.373094000 | 6.128553000  |
| H | 3.410574000   | -1.805621000 | 6.271116000  |
| H | 5.742323000   | -3.293663000 | 8.472976000  |
| H | 6.594742000   | -5.624284000 | 8.116956000  |
| H | 4.175574000   | -5.942412000 | 4.575140000  |
| H | 1.175029000   | -4.441917000 | 1.254952000  |
| H | -0.171030000  | -2.465104000 | 0.467457000  |
| H | 0.977080000   | -0.123484000 | 3.924174000  |
| H | -0.252719000  | -0.366566000 | 1.780595000  |
| H | 5.070657000   | -8.068259000 | 6.245038000  |
| H | 6.689409000   | -7.643232000 | 6.864633000  |
| H | 6.329286000   | -7.524977000 | 5.116561000  |
| O | -8.095345000  | -0.612668000 | 3.298660000  |
| N | -9.497843000  | -2.810266000 | -0.032807000 |
| N | -9.548806000  | -0.872142000 | 1.161956000  |
| N | -9.065116000  | -2.124496000 | 1.022805000  |
| C | -7.685353000  | -1.883978000 | 3.051675000  |
| C | -6.767447000  | -2.467602000 | 3.935756000  |
| C | -6.304380000  | -3.765492000 | 3.735957000  |
| C | -6.736066000  | -4.535353000 | 2.640982000  |
| C | -7.648043000  | -3.960724000 | 1.754680000  |
| C | -8.126195000  | -2.657758000 | 1.947223000  |
| C | -10.366333000 | -0.723398000 | 0.090986000  |
| C | -10.326187000 | -1.937143000 | -0.659775000 |
| C | -11.048360000 | -2.085141000 | -1.865113000 |
| C | -11.784902000 | -0.988052000 | -2.285061000 |
| C | -11.144141000 | 0.375568000  | -0.337777000 |

|   |               |              |              |
|---|---------------|--------------|--------------|
| C | -11.834619000 | 0.221094000  | -1.532229000 |
| C | -6.267136000  | -5.953572000 | 2.448443000  |
| H | -8.774934000  | -0.386098000 | 2.591006000  |
| H | -6.443185000  | -1.874141000 | 4.792866000  |
| H | -5.590767000  | -4.204760000 | 4.436846000  |
| H | -8.009934000  | -4.522889000 | 0.895030000  |
| H | -11.010479000 | -3.022396000 | -2.425158000 |
| H | -12.356537000 | -1.045580000 | -3.212653000 |
| H | -11.208429000 | 1.296040000  | 0.244063000  |
| H | -12.438227000 | 1.052955000  | -1.899515000 |
| H | -7.114851000  | -6.648737000 | 2.564928000  |
| H | -5.496099000  | -6.223709000 | 3.184523000  |
| H | -5.856223000  | -6.105454000 | 1.436451000  |
| O | -1.382982000  | -6.567892000 | 2.365401000  |
| N | 0.019517000   | -4.370294000 | 5.696869000  |
| N | 0.070697000   | -6.307515000 | 4.501732000  |
| N | -0.413212000  | -5.056063000 | 4.641256000  |
| C | -1.792974000  | -5.296581000 | 2.612387000  |
| C | -2.710444000  | -4.712471000 | 1.727050000  |
| C | -3.173947000  | -3.415067000 | 1.928105000  |
| C | -2.742043000  | -2.645622000 | 3.022197000  |
| C | -1.830066000  | -3.218933000 | 3.909010000  |
| C | -1.351913000  | -4.521899000 | 3.716466000  |
| C | 0.888005000   | -6.457161000 | 5.573076000  |
| C | 0.847860000   | -5.243417000 | 6.323837000  |
| C | 1.570250000   | -5.094516000 | 7.528803000  |
| C | 2.306794000   | -6.191604000 | 7.948751000  |
| C | 1.665814000   | -7.556128000 | 6.001838000  |
| C | 2.356510000   | -7.400751000 | 7.195917000  |
| C | -3.210974000  | -1.226085000 | 3.215246000  |
| H | -0.702957000  | -6.793975000 | 3.071801000  |
| H | -3.034924000  | -5.305516000 | 0.870823000  |
| H | -3.887342000  | -2.976215000 | 1.226333000  |
| H | -1.468393000  | -2.657671000 | 4.769032000  |
| H | 1.532369000   | -4.157262000 | 8.088848000  |
| H | 2.878210000   | -6.134978000 | 8.876714000  |
| H | 1.730319000   | -8.475696000 | 5.419625000  |
| H | 2.959901000   | -8.233515000 | 7.563577000  |
| H | -2.363258000  | -0.532240000 | 3.098252000  |
| H | -3.982010000  | -0.957266000 | 2.478656000  |
| H | -3.621887000  | -1.074202000 | 4.227238000  |
| O | 5.369865000   | -4.477688000 | 1.798152000  |
| N | 3.967366000   | -6.675286000 | -1.533315000 |
| N | 3.916402000   | -4.737163000 | -0.338551000 |

|   |               |               |              |
|---|---------------|---------------|--------------|
| N | 4.400095000   | -5.989518000  | -0.477702000 |
| C | 5.779857000   | -5.748998000  | 1.551167000  |
| C | 6.697762000   | -6.332623000  | 2.435248000  |
| C | 7.160830000   | -7.630512000  | 2.235449000  |
| C | 6.729142000   | -8.400374000  | 1.140474000  |
| C | 5.817166000   | -7.825745000  | 0.254172000  |
| C | 5.339012000   | -6.522779000  | 0.446715000  |
| C | 3.098876000   | -4.588418000  | -1.409522000 |
| C | 3.139022000   | -5.802163000  | -2.160283000 |
| C | 2.416849000   | -5.950162000  | -3.365621000 |
| C | 1.680328000   | -4.853063000  | -3.785583000 |
| C | 2.321020000   | -3.489474000  | -1.838253000 |
| C | 1.630775000   | -3.643815000  | -3.032789000 |
| C | 7.198075000   | -9.818593000  | 0.947935000  |
| H | 4.690276000   | -4.251119000  | 1.090498000  |
| H | 7.022023000   | -5.739162000  | 3.292358000  |
| H | 7.874442000   | -8.069781000  | 2.936338000  |
| H | 5.455275000   | -8.387910000  | -0.605478000 |
| H | 2.454731000   | -6.887416000  | -3.925666000 |
| H | 1.108672000   | -4.910601000  | -4.713161000 |
| H | 2.256781000   | -2.568981000  | -1.256444000 |
| H | 1.026810000   | -2.812293000  | -3.400013000 |
| H | 6.350358000   | -10.513758000 | 1.064420000  |
| H | 7.969110000   | -10.088730000 | 1.684015000  |
| H | 7.608987000   | -9.970474000  | -0.064057000 |
| O | -6.815655000  | -3.058147000  | -1.881941000 |
| N | -8.218143000  | -5.255764000  | -5.213426000 |
| N | -8.269106000  | -3.317641000  | -4.018661000 |
| N | -7.785415000  | -4.569994000  | -4.157813000 |
| C | -6.405653000  | -4.329479000  | -2.128930000 |
| C | -5.487740000  | -4.913098000  | -1.244867000 |
| C | -5.024678000  | -6.210990000  | -1.444662000 |
| C | -5.456365000  | -6.980852000  | -2.539636000 |
| C | -6.368342000  | -6.406223000  | -3.425938000 |
| C | -6.846490000  | -5.103254000  | -3.233399000 |
| C | -9.086632000  | -3.168897000  | -5.089633000 |
| C | -9.046486000  | -4.382640000  | -5.840393000 |
| C | -9.768658000  | -4.530639000  | -7.045731000 |
| C | -10.505202000 | -3.433551000  | -7.465679000 |
| C | -9.864439000  | -2.069929000  | -5.518394000 |
| C | -10.554918000 | -2.224404000  | -6.712847000 |
| C | -4.987435000  | -8.399070000  | -2.732175000 |
| H | -7.495232000  | -2.831607000  | -2.589616000 |
| H | -5.163484000  | -4.319640000  | -0.387753000 |

|   |               |              |              |
|---|---------------|--------------|--------------|
| H | -4.311065000  | -6.650259000 | -0.743772000 |
| H | -6.730233000  | -6.968387000 | -4.285589000 |
| H | -9.730778000  | -5.467894000 | -7.605776000 |
| H | -11.076836000 | -3.491079000 | -8.393271000 |
| H | -9.928727000  | -1.149459000 | -4.936554000 |
| H | -11.158526000 | -1.392542000 | -7.080134000 |
| H | -5.835151000  | -9.094234000 | -2.615691000 |
| H | -4.216397000  | -8.669208000 | -1.996096000 |
| H | -4.576522000  | -8.550953000 | -3.744168000 |
| O | 1.476774000   | -3.192469000 | -7.103418000 |
| N | -1.017872000  | -0.540492000 | -4.947967000 |
| N | -0.814684000  | -2.496348000 | -6.096759000 |
| N | -0.234713000  | -1.367904000 | -5.636374000 |
| C | 1.941633000   | -2.023610000 | -6.590835000 |
| C | 3.292297000   | -1.703719000 | -6.791179000 |
| C | 3.831567000   | -0.523132000 | -6.287280000 |
| C | 3.045682000   | 0.388176000  | -5.560968000 |
| C | 1.700942000   | 0.077757000  | -5.355700000 |
| C | 1.143974000   | -1.104624000 | -5.860858000 |
| C | -2.094258000  | -2.401723000 | -5.658688000 |
| C | -2.215789000  | -1.177963000 | -4.933892000 |
| C | -3.428978000  | -0.804116000 | -4.312100000 |
| C | -4.486771000  | -1.692177000 | -4.434054000 |
| C | -3.190486000  | -3.281450000 | -5.796338000 |
| C | -4.370458000  | -2.909083000 | -5.166774000 |
| C | 3.619702000   | 1.685827000  | -5.053889000 |
| H | 0.491417000   | -3.225085000 | -6.898589000 |
| H | 3.898502000   | -2.405575000 | -7.367280000 |
| H | 4.886088000   | -0.289302000 | -6.455566000 |
| H | 1.056254000   | 0.757181000  | -4.800044000 |
| H | -3.506599000  | 0.137376000  | -3.765005000 |
| H | -5.444985000  | -1.456434000 | -3.968487000 |
| H | -3.118588000  | -4.202808000 | -6.375879000 |
| H | -5.235807000  | -3.569820000 | -5.243123000 |
| H | 3.142855000   | 2.534366000  | -5.569963000 |
| H | 4.703891000   | 1.739844000  | -5.229678000 |
| H | 3.431198000   | 1.812190000  | -3.973779000 |
| O | -0.103282000  | -9.013389000 | -2.815217000 |
| N | 1.299217000   | -6.815792000 | 0.516250000  |
| N | 1.350398000   | -8.753013000 | -0.678886000 |
| N | 0.866489000   | -7.501562000 | -0.539362000 |
| C | -0.513274000  | -7.742079000 | -2.568232000 |
| C | -1.430743000  | -7.157969000 | -3.453567000 |
| C | -1.894247000  | -5.860565000 | -3.252514000 |

|   |              |               |              |
|---|--------------|---------------|--------------|
| C | -1.462335000 | -5.091124000  | -2.158385000 |
| C | -0.550366000 | -5.664431000  | -1.271608000 |
| C | -0.072211000 | -6.967397000  | -1.464152000 |
| C | 2.167707000  | -8.902659000  | 0.392458000  |
| C | 2.127561000  | -7.688915000  | 1.143219000  |
| C | 2.849952000  | -7.540015000  | 2.348184000  |
| C | 3.586495000  | -8.637103000  | 2.768133000  |
| C | 2.945515000  | -10.001626000 | 0.821220000  |
| C | 3.636211000  | -9.846249000  | 2.015299000  |
| C | -1.931534000 | -3.671279000  | -1.965464000 |
| H | 0.576744000  | -9.239474000  | -2.108818000 |
| H | -1.755223000 | -7.751014000  | -4.309794000 |
| H | -2.607641000 | -5.421714000  | -3.954285000 |
| H | -0.188692000 | -5.103169000  | -0.411586000 |
| H | 2.812070000  | -6.602759000  | 2.908230000  |
| H | 4.157911000  | -8.580477000  | 3.696096000  |
| H | 3.010020000  | -10.921194000 | 0.239007000  |
| H | 4.239600000  | -10.679012000 | 2.382959000  |
| H | -1.083203000 | -2.977805000  | -2.082288000 |
| H | -2.702302000 | -3.402775000  | -2.701972000 |
| H | -2.342143000 | -3.519749000  | -0.953355000 |
| O | -1.082627000 | 1.698527000   | 3.257819000  |
| N | -3.577275000 | 4.350505000   | 5.413269000  |
| N | -3.374087000 | 2.394649000   | 4.264478000  |
| N | -2.794115000 | 3.523094000   | 4.724863000  |
| C | -0.617764000 | 2.867379000   | 3.770419000  |
| C | 0.732894000  | 3.187283000   | 3.570049000  |
| C | 1.272161000  | 4.367874000   | 4.073942000  |
| C | 0.486280000  | 5.279174000   | 4.800268000  |
| C | -0.858461000 | 4.968753000   | 5.005536000  |
| C | -1.415427000 | 3.786372000   | 4.500378000  |
| C | -4.653659000 | 2.489274000   | 4.702547000  |
| C | -4.775190000 | 3.713035000   | 5.427344000  |
| C | -5.988378000 | 4.086881000   | 6.049137000  |
| C | -7.046173000 | 3.198819000   | 5.927182000  |
| C | -5.749888000 | 1.609546000   | 4.564899000  |
| C | -6.929858000 | 1.981913000   | 5.194463000  |
| C | 1.060299000  | 6.576823000   | 5.307347000  |
| H | -2.067986000 | 1.665913000   | 3.462647000  |
| H | 1.339061000  | 2.485432000   | 2.993923000  |
| H | 2.326685000  | 4.601694000   | 3.905670000  |
| H | -1.503148000 | 5.648176000   | 5.561192000  |
| H | -6.066002000 | 5.028372000   | 6.596232000  |
| H | -8.004387000 | 3.434564000   | 6.392748000  |



|   |              |              |              |
|---|--------------|--------------|--------------|
| H | -5.677990000 | 0.688190000  | 3.985358000  |
| H | -7.795209000 | 1.321176000  | 5.118113000  |
| H | 0.583452000  | 7.425362000  | 4.791272000  |
| H | 2.144489000  | 6.630840000  | 5.131559000  |
| H | 0.871795000  | 6.703188000  | 6.387457000  |
| O | 6.381649000  | 3.706245000  | 2.906374000  |
| N | 8.876077000  | 1.053366000  | 0.751297000  |
| N | 8.672671000  | 3.009638000  | 1.900971000  |
| N | 8.092699000  | 1.881193000  | 1.440585000  |
| C | 5.916572000  | 2.536482000  | 2.394164000  |
| C | 4.565908000  | 2.216593000  | 2.594507000  |
| C | 4.026633000  | 1.036010000  | 2.090586000  |
| C | 4.812523000  | 0.124696000  | 1.364298000  |
| C | 6.157045000  | 0.435533000  | 1.159912000  |
| C | 6.714012000  | 1.617915000  | 1.665069000  |
| C | 9.952244000  | 2.915013000  | 1.462900000  |
| C | 10.074211000 | 1.691738000  | 0.736850000  |
| C | 11.286964000 | 1.317406000  | 0.116311000  |
| C | 12.344758000 | 2.205467000  | 0.238265000  |
| C | 11.048909000 | 3.795226000  | 1.599294000  |
| C | 12.228662000 | 3.421956000  | 0.970103000  |
| C | 4.238504000  | -1.172952000 | 0.857218000  |
| H | 7.366789000  | 3.737958000  | 2.701918000  |
| H | 3.959701000  | 2.918447000  | 3.170609000  |
| H | 2.972132000  | 0.802176000  | 2.258924000  |
| H | 6.801734000  | -0.243890000 | 0.604255000  |
| H | 11.364804000 | 0.375498000  | -0.431666000 |
| H | 13.302971000 | 1.969723000  | -0.227301000 |
| H | 10.976575000 | 4.716098000  | 2.180091000  |
| H | 13.093796000 | 4.083111000  | 1.047334000  |
| H | 4.715351000  | -2.021493000 | 1.373293000  |
| H | 3.154531000  | -1.226068000 | 1.032634000  |
| H | 4.427007000  | -1.299318000 | -0.222892000 |
| O | 2.488341000  | 4.990562000  | -5.994823000 |
| N | 3.890621000  | 7.188575000  | -2.662473000 |
| N | 3.941802000  | 5.250038000  | -3.858120000 |
| N | 3.458112000  | 6.502390000  | -3.718968000 |
| C | 2.078130000  | 6.262289000  | -5.746955000 |
| C | 1.160442000  | 6.845498000  | -6.631919000 |
| C | 0.697156000  | 8.143804000  | -6.431237000 |
| C | 1.129062000  | 8.913248000  | -5.337145000 |
| C | 2.041256000  | 8.339521000  | -4.451215000 |
| C | 2.519192000  | 7.035652000  | -4.643387000 |
| C | 4.759112000  | 5.101710000  | -2.786266000 |

|   |              |              |              |
|---|--------------|--------------|--------------|
| C | 4.719182000  | 6.315035000  | -2.036387000 |
| C | 5.441138000  | 6.463452000  | -0.830167000 |
| C | 6.177899000  | 5.365947000  | -0.411101000 |
| C | 5.536917000  | 4.002742000  | -2.357505000 |
| C | 6.227397000  | 4.157216000  | -1.163053000 |
| C | 0.660132000  | 10.331466000 | -5.144607000 |
| H | 3.167929000  | 4.763993000  | -5.287169000 |
| H | 0.836180000  | 6.252036000  | -7.489029000 |
| H | -0.016239000 | 8.582654000  | -7.133009000 |
| H | 2.402930000  | 8.900782000  | -3.591192000 |
| H | 5.403475000  | 7.400289000  | -0.271004000 |
| H | 6.749532000  | 5.423475000  | 0.516489000  |
| H | 5.601424000  | 3.081856000  | -2.940227000 |
| H | 6.831223000  | 3.324939000  | -0.796648000 |
| H | 1.507847000  | 11.026631000 | -5.261090000 |
| H | -0.110906000 | 10.601604000 | -5.880686000 |
| H | 0.249002000  | 10.483765000 | -4.131731000 |
| O | -5.803860000 | 5.125768000  | -0.773736000 |
| N | -3.309431000 | 2.472888000  | -2.928814000 |
| N | -3.512836000 | 4.429160000  | -1.779140000 |
| N | -4.092810000 | 3.300715000  | -2.239525000 |
| C | -6.268936000 | 3.956005000  | -1.285947000 |
| C | -7.619600000 | 3.636115000  | -1.085603000 |
| C | -8.158870000 | 2.455529000  | -1.589502000 |
| C | -7.372986000 | 1.544219000  | -2.315813000 |
| C | -6.028463000 | 1.855055000  | -2.520199000 |
| C | -5.471496000 | 3.037438000  | -2.015041000 |
| C | -2.233264000 | 4.334535000  | -2.217210000 |
| C | -2.111297000 | 3.111261000  | -2.943261000 |
| C | -0.898544000 | 2.736929000  | -3.563799000 |
| C | 0.159249000  | 3.624992000  | -3.441849000 |
| C | -1.136597000 | 5.214744000  | -2.080809000 |
| C | 0.043153000  | 4.841481000  | -2.710017000 |
| C | -7.947008000 | 0.246563000  | -2.822900000 |
| H | -4.818720000 | 5.157481000  | -0.978192000 |
| H | -8.225806000 | 4.337970000  | -0.509501000 |
| H | -9.213391000 | 2.221698000  | -1.421215000 |
| H | -5.383775000 | 1.175633000  | -3.075855000 |
| H | -0.820704000 | 1.795020000  | -4.111777000 |
| H | 1.117463000  | 3.389245000  | -3.907411000 |
| H | -1.208933000 | 6.135619000  | -1.500020000 |
| H | 0.908222000  | 5.502654000  | -2.632747000 |
| H | -7.470144000 | -0.601958000 | -2.306832000 |
| H | -9.030976000 | 0.193456000  | -2.647473000 |

|   |              |              |              |
|---|--------------|--------------|--------------|
| H | -7.758508000 | 0.120201000  | -3.903003000 |
| O | 7.661348000  | 1.260747000  | -2.274244000 |
| N | 10.155777000 | -1.392132000 | -4.429322000 |
| N | 9.952372000  | 0.564140000  | -3.279648000 |
| N | 9.372401000  | -0.564305000 | -3.740033000 |
| C | 7.196271000  | 0.090986000  | -2.786460000 |
| C | 5.845655000  | -0.228865000 | -2.586113000 |
| C | 5.306320000  | -1.409456000 | -3.090067000 |
| C | 6.092223000  | -2.320803000 | -3.816320000 |
| C | 7.436746000  | -2.009965000 | -4.020707000 |
| C | 7.993713000  | -0.827582000 | -3.515549000 |
| C | 11.231944000 | 0.469515000  | -3.717717000 |
| C | 11.353911000 | -0.753760000 | -4.443769000 |
| C | 12.566665000 | -1.128091000 | -5.064307000 |
| C | 13.624459000 | -0.240030000 | -4.942353000 |
| C | 12.328610000 | 1.349728000  | -3.581324000 |
| C | 13.508363000 | 0.976458000  | -4.210515000 |
| C | 5.518204000  | -3.618450000 | -4.323400000 |
| H | 8.646488000  | 1.292461000  | -2.478700000 |
| H | 5.239310000  | 0.472894000  | -2.009964000 |
| H | 4.251750000  | -1.643310000 | -2.921653000 |
| H | 8.081433000  | -2.689389000 | -4.576363000 |
| H | 12.644506000 | -2.070001000 | -5.612285000 |
| H | 14.582673000 | -0.475776000 | -5.407919000 |
| H | 12.256275000 | 2.270599000  | -3.000528000 |
| H | 14.373496000 | 1.637614000  | -4.133284000 |
| H | 5.995053000  | -4.466991000 | -3.807326000 |
| H | 4.434232000  | -3.671566000 | -4.147984000 |
| H | 5.706707000  | -3.744815000 | -5.403510000 |
| O | 1.208647000  | 7.436026000  | -0.814222000 |
| N | 2.610919000  | 9.634074000  | 2.518144000  |
| N | 2.662102000  | 7.695534000  | 1.322498000  |
| N | 2.178410000  | 8.947888000  | 1.461650000  |
| C | 0.798435000  | 8.707790000  | -0.566341000 |
| C | -0.119259000 | 9.290996000  | -1.451301000 |
| C | -0.582544000 | 10.589301000 | -1.250619000 |
| C | -0.150640000 | 11.358746000 | -0.156527000 |
| C | 0.761555000  | 10.785018000 | 0.729403000  |
| C | 1.239490000  | 9.481150000  | 0.537232000  |
| C | 3.479411000  | 7.547207000  | 2.394351000  |
| C | 3.439481000  | 8.760534000  | 3.144231000  |
| C | 4.161437000  | 8.908950000  | 4.350451000  |
| C | 4.898197000  | 7.811445000  | 4.769517000  |
| C | 4.257218000  | 6.448240000  | 2.823114000  |

|   |               |              |              |
|---|---------------|--------------|--------------|
| C | 4.947695000   | 6.602715000  | 4.017566000  |
| C | -0.619570000  | 12.776963000 | 0.036012000  |
| H | 1.888263000   | 7.209403000  | -0.106539000 |
| H | -0.443520000  | 8.697533000  | -2.308411000 |
| H | -1.295938000  | 11.028153000 | -1.952391000 |
| H | 1.123228000   | 11.346281000 | 1.589425000  |
| H | 4.123773000   | 9.845787000  | 4.909613000  |
| H | 5.469833000   | 7.868973000  | 5.697108000  |
| H | 4.321724000   | 5.527355000  | 2.240391000  |
| H | 5.551522000   | 5.770436000  | 4.383970000  |
| H | 0.228146000   | 13.472130000 | -0.080473000 |
| H | -1.390606000  | 13.047102000 | -0.700068000 |
| H | -1.030700000  | 12.929264000 | 1.048886000  |
| O | -7.083561000  | 7.571265000  | 4.406882000  |
| N | -4.589132000  | 4.918386000  | 2.251805000  |
| N | -4.792537000  | 6.874658000  | 3.401479000  |
| N | -5.372509000  | 5.746214000  | 2.941092000  |
| C | -7.548638000  | 6.401502000  | 3.894671000  |
| C | -8.899301000  | 6.081613000  | 4.095015000  |
| C | -9.438572000  | 4.901025000  | 3.591116000  |
| C | -8.652688000  | 3.989719000  | 2.864802000  |
| C | -7.308246000  | 4.300291000  | 2.660645000  |
| C | -6.751210000  | 5.482963000  | 3.165530000  |
| C | -3.512966000  | 6.780033000  | 2.963408000  |
| C | -3.390986000  | 5.556739000  | 2.237391000  |
| C | -2.178250000  | 5.182369000  | 1.616919000  |
| C | -1.120461000  | 6.070506000  | 1.738742000  |
| C | -2.416301000  | 7.660247000  | 3.099801000  |
| C | -1.236548000  | 7.286977000  | 2.470610000  |
| C | -9.226706000  | 2.692068000  | 2.357726000  |
| H | -6.098422000  | 7.602979000  | 4.202426000  |
| H | -9.505507000  | 6.783467000  | 4.671117000  |
| H | -10.493093000 | 4.667196000  | 3.759403000  |
| H | -6.663344000  | 3.621403000  | 2.104548000  |
| H | -2.100391000  | 4.240529000  | 1.068734000  |
| H | -0.162236000  | 5.834743000  | 1.273207000  |
| H | -2.488635000  | 8.581118000  | 3.680598000  |
| H | -0.371415000  | 7.948132000  | 2.547842000  |
| H | -8.749858000  | 1.843527000  | 2.873800000  |
| H | -10.310678000 | 2.638952000  | 2.533141000  |
| H | -9.038203000  | 2.565702000  | 1.277617000  |

**UVI (A.B)**

S<sub>0</sub>

|   |              |              |              |
|---|--------------|--------------|--------------|
| O | 4.860360000  | -1.190269000 | 0.199186000  |
| H | 4.625042000  | -0.280158000 | 0.483814000  |
| N | 2.144124000  | -0.154831000 | 0.453526000  |
| N | 0.903830000  | 0.304105000  | 0.446486000  |
| C | 1.404394000  | -2.462825000 | 0.498686000  |
| H | 0.400519000  | -2.087983000 | 0.637869000  |
| C | 2.937636000  | -4.265852000 | 0.200301000  |
| H | 3.138184000  | -5.326400000 | 0.100122000  |
| C | 1.621556000  | -3.826863000 | 0.381708000  |
| C | 3.773829000  | -1.996360000 | 0.269290000  |
| C | 3.993582000  | -3.369658000 | 0.148618000  |
| H | 5.007955000  | -3.698167000 | -0.060824000 |
| C | 2.452370000  | -1.546752000 | 0.419048000  |
| N | 3.098774000  | 0.757995000  | 0.513710000  |
| C | 0.467961000  | -4.795012000 | 0.434700000  |
| H | -0.268343000 | -4.571532000 | -0.344260000 |
| H | 0.817622000  | -5.818021000 | 0.287766000  |
| H | -0.053260000 | -4.769200000 | 1.396246000  |
| C | 1.053334000  | 1.639538000  | 0.532887000  |
| C | 0.564795000  | 3.954510000  | 0.742582000  |
| H | -0.123756000 | 4.789547000  | 0.818989000  |
| C | 0.091536000  | 2.673760000  | 0.617402000  |
| H | -0.969954000 | 2.458510000  | 0.603227000  |
| C | 2.434591000  | 1.925116000  | 0.571337000  |
| C | 1.962292000  | 4.235898000  | 0.779153000  |
| H | 2.265487000  | 5.268785000  | 0.883386000  |
| C | 2.906654000  | 3.246544000  | 0.694396000  |
| H | 3.968780000  | 3.449653000  | 0.738224000  |
| I | -8.794712000 | -2.385978000 | -1.082459000 |
| F | -7.152235000 | -1.097147000 | 1.425964000  |
| F | -6.227554000 | -2.509263000 | -3.042950000 |
| C | -6.766639000 | -1.833690000 | -0.816689000 |
| C | -6.311489000 | -1.271750000 | 0.376107000  |
| C | -5.843597000 | -1.991855000 | -1.850860000 |
| O | -2.425582000 | -1.797047000 | 6.960107000  |
| H | -2.446926000 | -2.148412000 | 6.020578000  |
| N | -4.645417000 | -2.821908000 | 5.383990000  |
| N | -5.667218000 | -3.270021000 | 4.647733000  |
| C | -6.024136000 | -2.625115000 | 7.379169000  |
| H | -6.849062000 | -3.038804000 | 6.800052000  |
| C | -5.130864000 | -1.714182000 | 9.412526000  |
| H | -5.259331000 | -1.414589000 | 10.455327000 |
| C | -6.223726000 | -2.253277000 | 8.708310000  |
| C | -3.672367000 | -1.950459000 | 7.475014000  |

|   |              |              |               |
|---|--------------|--------------|---------------|
| C | -3.881069000 | -1.574722000 | 8.811280000   |
| H | -3.036686000 | -1.135427000 | 9.348497000   |
| C | -4.778961000 | -2.464158000 | 6.751970000   |
| N | -3.458974000 | -2.747493000 | 4.761188000   |
| C | -7.579877000 | -2.391623000 | 9.352300000   |
| H | -8.253196000 | -1.582787000 | 9.017946000   |
| H | -7.501020000 | -2.339219000 | 10.448721000  |
| H | -8.056050000 | -3.349576000 | 9.091379000   |
| C | -5.103114000 | -3.528107000 | 3.439963000   |
| C | -4.826405000 | -4.226054000 | 1.179113000   |
| H | -5.217089000 | -4.638375000 | 0.246371000   |
| C | -5.677600000 | -4.051996000 | 2.260395000   |
| H | -6.733842000 | -4.322452000 | 2.213019000   |
| C | -3.719086000 | -3.194386000 | 3.507828000   |
| C | -3.445506000 | -3.885103000 | 1.246885000   |
| H | -2.823341000 | -4.043812000 | 0.365166000   |
| C | -2.867758000 | -3.365194000 | 2.395494000   |
| H | -1.807286000 | -3.115125000 | 2.449561000   |
| I | -2.028497000 | -0.494214000 | -0.244162000  |
| F | -3.670978000 | -1.783052000 | -2.752567000  |
| F | -4.595084000 | -0.371371000 | 1.717039000   |
| C | -4.056574000 | -1.046504000 | -0.509926000  |
| C | -4.511725000 | -1.608442000 | -1.702712000  |
| C | -4.980415000 | -0.888824000 | 0.524620000   |
| O | -8.397630000 | -1.083151000 | -8.286710000  |
| H | -8.376286000 | -0.731787000 | -7.347181000  |
| N | -6.177795000 | -0.058291000 | -6.710593000  |
| N | -5.155995000 | 0.389823000  | -5.974336000  |
| C | -4.799077000 | -0.255084000 | -8.705772000  |
| H | -3.974151000 | 0.158605000  | -8.126654000  |
| C | -5.692349000 | -1.166017000 | -10.739129000 |
| H | -5.564681000 | -1.466088000 | -11.781567000 |
| C | -4.598912000 | -0.627357000 | -10.034220000 |
| C | -7.150270000 | -0.930175000 | -8.800924000  |
| C | -6.942144000 | -1.305476000 | -10.137883000 |
| H | -7.785953000 | -1.745207000 | -10.674406000 |
| C | -6.043676000 | -0.416476000 | -8.077880000  |
| N | -7.363664000 | -0.133142000 | -6.087098000  |
| C | -3.243335000 | -0.488576000 | -10.678901000 |
| H | -2.570017000 | -1.297412000 | -10.344548000 |
| H | -3.321618000 | -0.541416000 | -11.774630000 |
| H | -2.766588000 | 0.468942000  | -10.417290000 |
| C | -5.719524000 | 0.647473000  | -4.765874000  |
| C | -5.997034000 | 1.344942000  | -2.504660000  |

|   |              |             |              |
|---|--------------|-------------|--------------|
| H | -5.605548000 | 1.757741000 | -1.572281000 |
| C | -5.145612000 | 1.171797000 | -3.586997000 |
| H | -4.088796000 | 1.441818000 | -3.538928000 |
| C | -7.104124000 | 0.314178000 | -4.834428000 |
| C | -7.378517000 | 1.004417000 | -2.573132000 |
| H | -8.000214000 | 1.162665000 | -1.690750000 |
| C | -7.954879000 | 0.484511000 | -3.721210000 |
| H | -9.015780000 | 0.234917000 | -3.776139000 |
| I | 3.892028000  | 5.373815000 | -2.459627000 |
| F | 1.463229000  | 7.531311000 | -2.147943000 |
| O | 10.133040000 | 6.798022000 | -0.041871000 |
| H | 10.110896000 | 6.446180000 | -0.981036000 |
| N | 7.912405000  | 5.772683000 | -1.617624000 |
| F | 1.937999000  | 2.809847000 | -2.698096000 |
| N | 6.891404000  | 5.325049000 | -2.354244000 |
| C | 6.533686000  | 5.969477000 | 0.377555000  |
| H | 5.709561000  | 5.556266000 | -0.201925000 |
| C | 7.427758000  | 6.880888000 | 2.410548000  |
| H | 7.299291000  | 7.180480000 | 3.453350000  |
| C | 6.333521000  | 6.341751000 | 1.706000000  |
| C | 8.885680000  | 6.645046000 | 0.472345000  |
| C | 8.677554000  | 7.020348000 | 1.809303000  |
| H | 9.521363000  | 7.460079000 | 2.345827000  |
| C | 7.779086000  | 6.131347000 | -0.250699000 |
| N | 9.099074000  | 5.848013000 | -2.241482000 |
| C | 4.978748000  | 6.203444000 | 2.350323000  |
| H | 4.305424000  | 7.012283000 | 2.015973000  |
| H | 5.057609000  | 6.255848000 | 3.446744000  |
| H | 4.501974000  | 5.245942000 | 2.088694000  |
| C | 1.783375000  | 5.178679000 | -2.433894000 |
| C | 7.454934000  | 5.067398000 | -3.562706000 |
| C | 7.731643000  | 4.369450000 | -5.823557000 |
| H | 7.340958000  | 3.957131000 | -6.756299000 |
| C | 6.881022000  | 4.543074000 | -4.741582000 |
| H | 5.824781000  | 4.272618000 | -4.788958000 |
| C | 8.839534000  | 5.400693000 | -3.494151000 |
| C | 9.113127000  | 4.709975000 | -5.755086000 |
| H | 9.734824000  | 4.551728000 | -6.637468000 |
| C | 9.690289000  | 5.230360000 | -4.607370000 |
| H | 10.750390000 | 5.479476000 | -4.552078000 |
| C | 0.947306000  | 6.282266000 | -2.263047000 |
| C | 1.181573000  | 3.924911000 | -2.554344000 |
| I | -3.148231000 | 4.683166000 | -2.315082000 |
| F | -0.718633000 | 2.526148000 | -2.627128000 |

|   |              |              |              |
|---|--------------|--------------|--------------|
| F | -1.194203000 | 7.247133000  | -2.076613000 |
| C | -1.038779000 | 4.878780000  | -2.341176000 |
| C | -0.202710000 | 3.775193000  | -2.512023000 |
| C | -0.436977000 | 6.132548000  | -2.220726000 |
| O | 0.706827000  | -7.985859000 | 2.687376000  |
| H | 0.728168000  | -7.634495000 | 3.626902000  |
| N | 2.926654000  | -6.961012000 | 4.263486000  |
| N | 3.948455000  | -6.512899000 | 4.999743000  |
| C | 4.305374000  | -7.157809000 | 2.268308000  |
| H | 5.130299000  | -6.744116000 | 2.847424000  |
| C | 3.412090000  | -8.068718000 | 0.234971000  |
| H | 3.539783000  | -8.368801000 | -0.807489000 |
| C | 4.505527000  | -7.530075000 | 0.939870000  |
| C | 1.954180000  | -7.832901000 | 2.173156000  |
| C | 2.162302000  | -8.208200000 | 0.836186000  |
| H | 1.318496000  | -8.647925000 | 0.299671000  |
| C | 3.060773000  | -7.319197000 | 2.896198000  |
| N | 1.740785000  | -7.035863000 | 4.886982000  |
| C | 5.861113000  | -7.391295000 | 0.295176000  |
| H | 6.534433000  | -8.200134000 | 0.629530000  |
| H | 5.782831000  | -7.444137000 | -0.800552000 |
| H | 6.337859000  | -6.433780000 | 0.556788000  |
| C | 3.384925000  | -6.255248000 | 6.208205000  |
| C | 3.107416000  | -5.557779000 | 8.469418000  |
| H | 3.498901000  | -5.144981000 | 9.401798000  |
| C | 3.958837000  | -5.730924000 | 7.387081000  |
| H | 5.015653000  | -5.460903000 | 7.435151000  |
| C | 2.000324000  | -6.588543000 | 6.139650000  |
| C | 1.725933000  | -5.898304000 | 8.400948000  |
| H | 1.104235000  | -5.740056000 | 9.283329000  |
| C | 1.149571000  | -6.418209000 | 7.252869000  |
| H | 0.088669000  | -6.667804000 | 7.197940000  |
| I | -9.785526000 | 1.956610000  | 2.471050000  |
| F | -8.143049000 | 3.245441000  | 4.979473000  |
| F | -7.218368000 | 1.833325000  | 0.510559000  |
| C | -7.757453000 | 2.508898000  | 2.736820000  |
| C | -7.302303000 | 3.070838000  | 3.929615000  |
| C | -6.834411000 | 2.350732000  | 1.702649000  |
| I | -3.019314000 | 3.848367000  | 3.309365000  |
| F | -4.661792000 | 2.559536000  | 0.800941000  |
| O | 3.745345000  | 2.973527000  | 3.846580000  |
| H | 3.428394000  | 3.917773000  | 3.967243000  |
| N | 1.046274000  | 4.049084000  | 3.989220000  |
| F | -5.585898000 | 3.971216000  | 5.270548000  |



|   |              |              |              |
|---|--------------|--------------|--------------|
| N | -0.192191000 | 4.550578000  | 4.030019000  |
| C | 0.235821000  | 1.755252000  | 3.946339000  |
| H | -0.774469000 | 2.153988000  | 4.032023000  |
| C | 1.757525000  | -0.088134000 | 3.725855000  |
| H | 1.943204000  | -1.161412000 | 3.644492000  |
| C | 0.435131000  | 0.378775000  | 3.844846000  |
| C | 2.645772000  | 2.178886000  | 3.836020000  |
| C | 2.838300000  | 0.792111000  | 3.730788000  |
| H | 3.863997000  | 0.434660000  | 3.614983000  |
| C | 1.312550000  | 2.656384000  | 3.923017000  |
| N | 2.046414000  | 4.944024000  | 4.037094000  |
| C | -0.735139000 | -0.570000000 | 3.824882000  |
| H | -1.226754000 | -0.561870000 | 2.836131000  |
| H | -0.409368000 | -1.599795000 | 4.035709000  |
| H | -1.493075000 | -0.293303000 | 4.574298000  |
| C | -5.047388000 | 3.296078000  | 3.043595000  |
| C | 0.007443000  | 5.889905000  | 4.129403000  |
| C | -0.407696000 | 8.226129000  | 4.349590000  |
| H | -1.085764000 | 9.075453000  | 4.450291000  |
| C | -0.926990000 | 6.943615000  | 4.240772000  |
| H | -2.001316000 | 6.752420000  | 4.258254000  |
| C | 1.411745000  | 6.138756000  | 4.127055000  |
| C | 0.995349000  | 8.472151000  | 4.340729000  |
| H | 1.346704000  | 9.500857000  | 4.430674000  |
| C | 1.925035000  | 7.449558000  | 4.226888000  |
| H | 2.998473000  | 7.638140000  | 4.231595000  |
| C | -5.502538000 | 2.734139000  | 1.850799000  |
| C | -5.971230000 | 3.453765000  | 4.078128000  |
| O | -9.388445000 | 3.259436000  | -4.733201000 |
| H | -9.367100000 | 3.610800000  | -3.793672000 |
| N | -7.168609000 | 4.284296000  | -3.157084000 |
| N | -6.146809000 | 4.732410000  | -2.420827000 |
| C | -5.789891000 | 4.087504000  | -5.152264000 |
| H | -4.964965000 | 4.501193000  | -4.573146000 |
| C | -6.683163000 | 3.176571000  | -7.185620000 |
| H | -6.555495000 | 2.876499000  | -8.228059000 |
| C | -5.589726000 | 3.715230000  | -6.480711000 |
| C | -8.141084000 | 3.412413000  | -5.247415000 |
| C | -7.932958000 | 3.037111000  | -6.584374000 |
| H | -8.776767000 | 2.597380000  | -7.120897000 |
| C | -7.034490000 | 3.926112000  | -4.524371000 |
| N | -8.354477000 | 4.209445000  | -2.533589000 |
| C | -4.234149000 | 3.854012000  | -7.125393000 |
| H | -3.560831000 | 3.045176000  | -6.791040000 |

|   |               |              |              |
|---|---------------|--------------|--------------|
| H | -4.312432000  | 3.801171000  | -8.221122000 |
| H | -3.757402000  | 4.811529000  | -6.863781000 |
| C | -6.710338000  | 4.990060000  | -1.212364000 |
| C | -6.987847000  | 5.687529000  | 1.048848000  |
| H | -6.596362000  | 6.100328000  | 1.981227000  |
| C | -6.136426000  | 5.514385000  | -0.033489000 |
| H | -5.079610000  | 5.784406000  | 0.014580000  |
| C | -8.094938000  | 4.656766000  | -1.280919000 |
| C | -8.369330000  | 5.347004000  | 0.980377000  |
| H | -8.991028000  | 5.505253000  | 1.862759000  |
| C | -8.945693000  | 4.827099000  | -0.167701000 |
| H | -10.006594000 | 4.577505000  | -0.222631000 |
| I | -7.803898000  | -6.728565000 | -4.635968000 |
| F | -6.161421000  | -5.439734000 | -2.127544000 |
| F | -5.236740000  | -6.851851000 | -6.596459000 |
| C | -5.775825000  | -6.176277000 | -4.370198000 |
| C | -5.320676000  | -5.614335000 | -3.177402000 |
| C | -4.852783000  | -6.334443000 | -5.404369000 |
| O | -1.434820000  | -6.139586000 | 3.406581000  |
| H | -1.456194000  | -6.490977000 | 2.466898000  |
| N | -3.654603000  | -7.164495000 | 1.830481000  |
| N | -4.676405000  | -7.612609000 | 1.094224000  |
| C | -5.033322000  | -6.967702000 | 3.825661000  |
| H | -5.858248000  | -7.381391000 | 3.246544000  |
| C | -4.140050000  | -6.056770000 | 5.859017000  |
| C | -5.232912000  | -6.595864000 | 5.154802000  |
| C | -2.681551000  | -6.293057000 | 3.921509000  |
| C | -2.890256000  | -5.917310000 | 5.257771000  |
| H | -2.045872000  | -5.478015000 | 5.794988000  |
| C | -3.788148000  | -6.806746000 | 3.198462000  |
| N | -2.468160000  | -7.090079000 | 1.207678000  |
| C | -4.112300000  | -7.870695000 | -0.113545000 |
| C | -3.835591000  | -8.568643000 | -2.374396000 |
| H | -4.226275000  | -8.980963000 | -3.307138000 |
| C | -4.686786000  | -8.394584000 | -1.293113000 |
| H | -5.743028000  | -8.665040000 | -1.340490000 |
| C | -2.728275000  | -7.536960000 | -0.045685000 |
| C | -2.454686000  | -8.227668000 | -2.306622000 |
| H | -1.832409000  | -8.386364000 | -3.188308000 |
| C | -1.876944000  | -7.707733000 | -1.158232000 |
| H | -0.816547000  | -7.457709000 | -1.103895000 |
| I | -1.037686000  | -4.836808000 | -3.797653000 |
| F | -2.680164000  | -6.125639000 | -6.306076000 |
| O | 5.726972000   | -5.711648000 | -3.260437000 |

|   |              |               |              |
|---|--------------|---------------|--------------|
| H | 5.410019000  | -4.767399000  | -3.139775000 |
| N | 3.027902000  | -4.636091000  | -3.117797000 |
| F | -3.604279000 | -4.713963000  | -1.836464000 |
| N | 1.789436000  | -4.134597000  | -3.076998000 |
| C | 2.217449000  | -6.929923000  | -3.160678000 |
| H | 1.207159000  | -6.531187000  | -3.074994000 |
| C | 3.739152000  | -8.773310000  | -3.381162000 |
| H | 3.924836000  | -9.846586000  | -3.462525000 |
| C | 2.416757000  | -8.306403000  | -3.262171000 |
| C | 4.627401000  | -6.506289000  | -3.270998000 |
| C | 4.819926000  | -7.893061000  | -3.376229000 |
| H | 5.845624000  | -8.250515000  | -3.492034000 |
| C | 3.294178000  | -6.028791000  | -3.184001000 |
| N | 4.028041000  | -3.741151000  | -3.069924000 |
| C | 1.246423000  | -9.255167000  | -3.282099000 |
| H | 0.754888000  | -9.247040000  | -4.270914000 |
| H | 1.572203000  | -10.284981000 | -3.071248000 |
| H | 0.488563000  | -8.978490000  | -2.532698000 |
| C | -3.065760000 | -5.389099000  | -4.063422000 |
| C | 1.989072000  | -2.795270000  | -2.977615000 |
| C | 1.573932000  | -0.459046000  | -2.757428000 |
| H | 0.895863000  | 0.390277000   | -2.656726000 |
| C | 1.054637000  | -1.741559000  | -2.866246000 |
| H | -0.019689000 | -1.932755000  | -2.848763000 |
| C | 3.393373000  | -2.546419000  | -2.979962000 |
| C | 2.976977000  | -0.213025000  | -2.766288000 |
| H | 3.328331000  | 0.815686000   | -2.676343000 |
| C | 3.906663000  | -1.235616000  | -2.880130000 |
| H | 4.980101000  | -1.047036000  | -2.875422000 |
| C | -3.520910000 | -5.951036000  | -5.256218000 |
| C | -3.989601000 | -5.231409000  | -3.028889000 |
| I | 2.901214000  | 9.716402000   | 1.093882000  |
| F | 0.472415000  | 11.873899000  | 1.405566000  |
| F | 0.947191000  | 7.152411000   | 0.855416000  |
| C | 0.792560000  | 9.521267000   | 1.119625000  |
| C | -0.043508000 | 10.624853000  | 1.290462000  |
| C | 0.190761000  | 8.267500000   | 0.999167000  |
| I | -4.139045000 | 9.025753000   | 1.238427000  |
| F | -1.709447000 | 6.868735000   | 0.926381000  |
| F | -2.185016000 | 11.589721000  | 1.476895000  |
| C | -2.029592000 | 9.221367000   | 1.212332000  |
| C | -1.193524000 | 8.117781000   | 1.041476000  |
| C | -1.427791000 | 10.475135000  | 1.332783000  |
| O | 11.123854000 | 2.455435000   | -3.595379000 |

|   |              |              |               |
|---|--------------|--------------|---------------|
| H | 11.101710000 | 2.103592000  | -4.534545000  |
| N | 8.903219000  | 1.430096000  | -5.171133000  |
| N | 7.882217000  | 0.982461000  | -5.907753000  |
| C | 7.524500000  | 1.626889000  | -3.175954000  |
| H | 6.700375000  | 1.213679000  | -3.755434000  |
| C | 8.418572000  | 2.538300000  | -1.142960000  |
| H | 8.290105000  | 2.837893000  | -0.100159000  |
| C | 7.324338000  | 1.999164000  | -1.847503000  |
| C | 9.876494000  | 2.302459000  | -3.081164000  |
| C | 9.668368000  | 2.677760000  | -1.744206000  |
| H | 10.512177000 | 3.117492000  | -1.207682000  |
| C | 8.769900000  | 1.788759000  | -3.804208000  |
| N | 10.089887000 | 1.505426000  | -5.794990000  |
| C | 5.969550000  | 1.860852000  | -1.203184000  |
| H | 5.296245000  | 2.669673000  | -1.537523000  |
| H | 6.048403000  | 1.913273000  | -0.106773000  |
| H | 5.492821000  | 0.903344000  | -1.464802000  |
| C | 8.445747000  | 0.724811000  | -7.116215000  |
| C | 8.722457000  | 0.026863000  | -9.377066000  |
| H | 8.331772000  | -0.385456000 | -10.309808000 |
| C | 7.871836000  | 0.200486000  | -8.295091000  |
| H | 6.815594000  | -0.069970000 | -8.342467000  |
| C | 9.830348000  | 1.058105000  | -7.047660000  |
| C | 10.103941000 | 0.367387000  | -9.308595000  |
| H | 10.725638000 | 0.209140000  | -10.190976000 |
| C | 10.681103000 | 0.887772000  | -8.160879000  |
| H | 11.741204000 | 1.136888000  | -8.105587000  |
| O | -0.283995000 | -3.643285000 | 6.240878000   |
| H | -0.262651000 | -3.291921000 | 7.180407000   |
| N | 1.935840000  | -2.618425000 | 7.816995000   |
| N | 2.957641000  | -2.170312000 | 8.553252000   |
| C | 3.314559000  | -2.815218000 | 5.821816000   |
| H | 4.139485000  | -2.401528000 | 6.400933000   |
| C | 2.421300000  | -3.726072000 | 3.788438000   |
| H | 2.548862000  | -4.026324000 | 2.746027000   |
| C | 3.514721000  | -3.187479000 | 4.493362000   |
| C | 0.963365000  | -3.490309000 | 5.726664000   |
| C | 1.171498000  | -3.865630000 | 4.389713000   |
| H | 0.327683000  | -4.305342000 | 3.853182000   |
| C | 2.069959000  | -2.976609000 | 6.449707000   |
| N | 0.749971000  | -2.693276000 | 8.440490000   |
| C | 4.870300000  | -3.048709000 | 3.848686000   |
| H | 5.543619000  | -3.857546000 | 4.183039000   |
| H | 4.792018000  | -3.101549000 | 2.752957000   |

|   |              |              |              |
|---|--------------|--------------|--------------|
| H | 5.347047000  | -2.091189000 | 4.110300000  |
| C | 2.394111000  | -1.912661000 | 9.761714000  |
| C | 2.116603000  | -1.215192000 | 12.022927000 |
| H | 2.508087000  | -0.802393000 | 12.955307000 |
| C | 2.968023000  | -1.388336000 | 10.940590000 |
| H | 4.024839000  | -1.118315000 | 10.988660000 |
| C | 1.009511000  | -2.245955000 | 9.693159000  |
| C | 0.735119000  | -1.555716000 | 11.954456000 |
| H | 0.113421000  | -1.397468000 | 12.836837000 |
| C | 0.158757000  | -2.075622000 | 10.806378000 |
| H | -0.902145000 | -2.325216000 | 10.751449000 |
| O | 6.103698000  | 0.181205000  | 2.352423000  |
| H | 6.420648000  | -0.763038000 | 2.231765000  |
| N | 8.802771000  | -0.894346000 | 2.209788000  |
| N | 10.041236000 | -1.395840000 | 2.168989000  |
| C | 9.613224000  | 1.399485000  | 2.252669000  |
| H | 10.623514000 | 1.000749000  | 2.166985000  |
| C | 8.091521000  | 3.242872000  | 2.473152000  |
| H | 7.905842000  | 4.316150000  | 2.554515000  |
| C | 9.413914000  | 2.775962000  | 2.354161000  |
| C | 7.203844000  | 0.975421000  | 2.363685000  |
| C | 7.010745000  | 2.362627000  | 2.468218000  |
| H | 5.985049000  | 2.720078000  | 2.584024000  |
| C | 8.536496000  | 0.498353000  | 2.275993000  |
| N | 7.802632000  | -1.789286000 | 2.161915000  |
| C | 10.584250000 | 3.724730000  | 2.374090000  |
| H | 11.074986000 | 3.716125000  | 3.363266000  |
| H | 10.258471000 | 4.754542000  | 2.163239000  |
| H | 11.342121000 | 3.448041000  | 1.624710000  |
| C | 9.841377000  | -2.736082000 | 2.070660000  |
| C | 10.256742000 | -5.071391000 | 1.849418000  |
| H | 10.934810000 | -5.920715000 | 1.748716000  |
| C | 10.775236000 | -3.789356000 | 1.958598000  |
| H | 11.849562000 | -3.598160000 | 1.941116000  |
| C | 8.437301000  | -2.984019000 | 2.071953000  |
| C | 8.853696000  | -5.317413000 | 1.858279000  |
| H | 8.502341000  | -6.346119000 | 1.768334000  |
| C | 7.924584000  | -4.295256000 | 1.972813000  |
| H | 6.850572000  | -4.483402000 | 1.967413000  |
| O | 7.094517000  | -4.161364000 | -1.201101000 |
| H | 7.411480000  | -5.105623000 | -1.321737000 |
| N | 9.793585000  | -5.236934000 | -1.343721000 |
| N | 11.032050000 | -5.738428000 | -1.384520000 |
| C | 10.604037000 | -2.943103000 | -1.300840000 |

|   |              |               |              |
|---|--------------|---------------|--------------|
| H | 11.614328000 | -3.341839000  | -1.386524000 |
| C | 9.082335000  | -1.099716000  | -1.080357000 |
| H | 8.896656000  | -0.026438000  | -0.998993000 |
| C | 10.404728000 | -1.566626000  | -1.199347000 |
| C | 8.194664000  | -3.367176000  | -1.189813000 |
| C | 8.001541000  | -1.980005000  | -1.085305000 |
| H | 6.975887000  | -1.622443000  | -0.969462000 |
| C | 9.527310000  | -3.844234000  | -1.277515000 |
| N | 8.793446000  | -6.131874000  | -1.391594000 |
| C | 11.575064000 | -0.617858000  | -1.179420000 |
| H | 12.065800000 | -0.626463000  | -0.190243000 |
| H | 11.249285000 | 0.411956000   | -1.390270000 |
| H | 12.332935000 | -0.894547000  | -1.928799000 |
| C | 10.832190000 | -7.078670000  | -1.482849000 |
| C | 11.247556000 | -9.413979000  | -1.704091000 |
| H | 11.925624000 | -10.263302000 | -1.804792000 |
| C | 11.766050000 | -8.131944000  | -1.594911000 |
| H | 12.840375000 | -7.940748000  | -1.612393000 |
| C | 9.428115000  | -7.326607000  | -1.481556000 |
| C | 9.844509000  | -9.660000000  | -1.695230000 |
| H | 9.493155000  | -10.688707000 | -1.785175000 |
| C | 8.915398000  | -8.637844000  | -1.580696000 |
| H | 7.841386000  | -8.825990000  | -1.586096000 |
| C | -6.603355000 | -6.724291000  | 5.845447000  |
| H | -7.315214000 | -6.102581000  | 5.343815000  |
| H | -6.928757000 | -7.742834000  | 5.805649000  |
| H | -6.518286000 | -6.416689000  | 6.866743000  |
| H | -4.271070000 | -5.748149000  | 6.875130000  |

S<sub>1</sub> (enol)

|   |             |              |              |
|---|-------------|--------------|--------------|
| O | 4.786454000 | -1.175345000 | 0.245033000  |
| H | 4.444671000 | -0.224075000 | 0.417652000  |
| N | 2.133220000 | -0.195421000 | 0.425916000  |
| N | 0.862957000 | 0.307885000  | 0.457614000  |
| C | 1.376741000 | -2.474190000 | 0.518068000  |
| H | 0.364936000 | -2.123786000 | 0.655907000  |
| C | 2.967166000 | -4.289435000 | 0.205379000  |
| H | 3.161037000 | -5.349460000 | 0.104499000  |
| C | 1.637109000 | -3.840521000 | 0.387610000  |
| C | 3.765245000 | -2.009345000 | 0.282633000  |
| C | 4.013602000 | -3.386951000 | 0.156901000  |
| H | 5.033660000 | -3.695191000 | -0.051974000 |
| C | 2.399324000 | -1.533221000 | 0.429074000  |
| N | 3.133950000 | 0.742633000  | 0.473929000  |

|   |              |              |              |
|---|--------------|--------------|--------------|
| C | 0.500216000  | -4.813661000 | 0.416399000  |
| H | -0.165458000 | -4.641767000 | -0.438020000 |
| H | 0.855411000  | -5.843045000 | 0.379813000  |
| H | -0.107245000 | -4.698941000 | 1.320001000  |
| C | 1.061528000  | 1.631062000  | 0.548216000  |
| C | 0.609442000  | 3.969572000  | 0.754032000  |
| H | -0.074829000 | 4.808277000  | 0.830747000  |
| C | 0.123182000  | 2.680588000  | 0.639709000  |
| H | -0.940262000 | 2.474012000  | 0.638526000  |
| C | 2.468877000  | 1.906906000  | 0.565254000  |
| C | 1.998610000  | 4.233927000  | 0.776908000  |
| H | 2.317887000  | 5.263352000  | 0.871967000  |
| C | 2.939874000  | 3.222036000  | 0.684850000  |
| H | 4.003328000  | 3.420393000  | 0.718172000  |
| I | -8.795042000 | -2.385290000 | -1.082485000 |
| F | -7.152530000 | -1.096345000 | 1.425857000  |
| F | -6.227876000 | -2.508818000 | -3.042950000 |
| C | -6.766949000 | -1.833064000 | -0.816741000 |
| C | -6.311783000 | -1.271056000 | 0.376017000  |
| C | -5.843906000 | -1.991340000 | -1.850895000 |
| O | -2.425940000 | -1.796037000 | 6.960080000  |
| H | -2.447293000 | -2.147468000 | 6.020576000  |
| N | -4.645806000 | -2.820922000 | 5.384022000  |
| N | -5.667619000 | -3.269047000 | 4.647791000  |
| C | -6.024529000 | -2.623931000 | 7.379179000  |
| H | -6.849468000 | -3.037629000 | 6.800086000  |
| C | -5.131235000 | -1.712889000 | 9.412475000  |
| H | -5.259697000 | -1.413216000 | 10.455255000 |
| C | -6.224114000 | -2.251990000 | 8.708292000  |
| C | -3.672735000 | -1.949362000 | 7.474990000  |
| C | -3.881431000 | -1.573521000 | 8.811228000  |
| H | -3.037032000 | -1.134221000 | 9.348418000  |
| C | -4.779344000 | -2.463069000 | 6.751976000  |
| N | -3.459356000 | -2.746599000 | 4.761223000  |
| C | -7.580274000 | -2.390236000 | 9.352282000  |
| H | -8.253559000 | -1.581397000 | 9.017867000  |
| H | -7.501422000 | -2.337757000 | 10.448700000 |
| H | -8.056483000 | -3.348189000 | 9.091427000  |
| C | -5.103519000 | -3.527242000 | 3.440043000  |
| C | -4.826822000 | -4.225362000 | 1.179244000  |
| H | -5.217517000 | -4.637734000 | 0.246530000  |
| C | -5.678017000 | -4.051193000 | 2.260509000  |
| H | -6.734270000 | -4.321610000 | 2.213145000  |
| C | -3.719466000 | -3.193626000 | 3.507911000  |

|   |              |              |               |
|---|--------------|--------------|---------------|
| C | -3.445903000 | -3.884495000 | 1.247012000   |
| H | -2.823746000 | -4.043257000 | 0.365298000   |
| C | -2.868176000 | -3.364337000 | 2.395404000   |
| H | -1.807656000 | -3.114507000 | 2.449638000   |
| I | -2.028717000 | -0.493745000 | -0.244222000  |
| F | -3.671273000 | -1.782687000 | -2.752603000  |
| F | -4.595352000 | -0.370650000 | 1.716896000   |
| C | -4.056853000 | -1.045982000 | -0.509989000  |
| C | -4.512019000 | -1.607975000 | -1.702763000  |
| C | -4.980697000 | -0.888164000 | 0.524510000   |
| O | -8.397862000 | -1.082996000 | -8.286826000  |
| H | -8.376511000 | -0.731564000 | -7.347323000  |
| N | -6.177997000 | -0.058111000 | -6.710769000  |
| N | -5.156183000 | 0.390015000  | -5.974537000  |
| C | -4.799273000 | -0.255101000 | -8.705925000  |
| H | -3.974335000 | 0.158597000  | -8.126831000  |
| C | -5.692568000 | -1.166143000 | -10.739222000 |
| H | -5.564906000 | -1.466296000 | -11.781638000 |
| C | -4.599114000 | -0.627478000 | -10.034345000 |
| C | -7.150493000 | -0.930106000 | -8.801044000  |
| C | -6.942373000 | -1.305511000 | -10.137974000 |
| H | -7.786196000 | -1.745247000 | -10.674471000 |
| C | -6.043883000 | -0.416398000 | -8.078029000  |
| N | -7.363873000 | -0.132871000 | -6.087276000  |
| C | -3.243528000 | -0.488796000 | -10.679027000 |
| H | -2.570245000 | -1.297635000 | -10.344612000 |
| H | -3.321806000 | -0.541712000 | -11.774753000 |
| H | -2.766745000 | 0.468721000  | -10.417481000 |
| C | -5.719710000 | 0.647775000  | -4.766097000  |
| C | -5.997206000 | 1.345416000  | -2.504935000  |
| H | -5.605710000 | 1.758267000  | -1.572583000  |
| C | -5.145785000 | 1.172161000  | -3.587255000  |
| H | -4.088958000 | 1.442143000  | -3.539198000  |
| C | -7.104323000 | 0.314530000  | -4.834636000  |
| C | -7.378703000 | 1.004941000  | -2.573391000  |
| H | -8.000399000 | 1.163277000  | -1.691025000  |
| C | -7.955078000 | 0.484976000  | -3.721436000  |
| H | -9.015989000 | 0.235420000  | -3.776354000  |
| I | 3.892015000  | 5.373900000  | -2.460127000  |
| F | 1.463299000  | 7.531515000  | -2.148613000  |
| O | 10.133068000 | 6.798034000  | -0.042433000  |
| H | 10.110916000 | 6.446125000  | -0.981573000  |
| N | 7.912402000  | 5.772670000  | -1.618127000  |
| F | 1.937883000  | 2.809992000  | -2.698419000  |



|   |              |              |              |
|---|--------------|--------------|--------------|
| N | 6.891389000  | 5.325023000  | -2.354722000 |
| C | 6.533679000  | 5.969661000  | 0.377029000  |
| H | 5.709540000  | 5.556441000  | -0.202426000 |
| C | 7.427774000  | 6.881183000  | 2.409963000  |
| H | 7.299312000  | 7.180854000  | 3.452742000  |
| C | 6.333519000  | 6.342039000  | 1.705446000  |
| C | 8.885698000  | 6.645144000  | 0.471786000  |
| C | 8.677578000  | 7.020549000  | 1.808715000  |
| H | 9.521401000  | 7.460286000  | 2.345213000  |
| C | 7.779089000  | 6.131437000  | -0.251229000 |
| N | 9.099078000  | 5.847909000  | -2.241982000 |
| C | 4.978750000  | 6.203828000  | 2.349761000  |
| H | 4.305449000  | 7.012673000  | 2.015357000  |
| H | 5.057595000  | 6.256310000  | 3.446188000  |
| H | 4.501889000  | 5.246301000  | 2.088228000  |
| C | 1.783353000  | 5.178850000  | -2.434394000 |
| C | 7.454916000  | 5.067264000  | -3.563162000 |
| C | 7.731612000  | 4.369143000  | -5.823961000 |
| H | 7.340916000  | 3.956772000  | -6.756675000 |
| C | 6.880991000  | 4.542877000  | -4.742003000 |
| H | 5.824739000  | 4.272460000  | -4.789367000 |
| C | 8.839528000  | 5.400508000  | -3.494622000 |
| C | 9.113108000  | 4.709618000  | -5.755505000 |
| H | 9.734805000  | 4.551282000  | -6.637871000 |
| C | 9.690284000  | 5.230062000  | -4.607823000 |
| H | 10.750395000 | 5.479140000  | -4.552542000 |
| C | 0.947326000  | 6.282483000  | -2.263631000 |
| C | 1.181503000  | 3.925097000  | -2.554758000 |
| I | -3.148273000 | 4.683541000  | -2.315578000 |
| F | -0.718758000 | 2.526404000  | -2.627454000 |
| F | -1.194145000 | 7.247448000  | -2.077280000 |
| C | -1.038813000 | 4.879069000  | -2.341673000 |
| C | -0.202787000 | 3.775438000  | -2.512435000 |
| C | -0.436962000 | 6.132822000  | -2.221308000 |
| O | 0.706251000  | -7.985279000 | 2.687812000  |
| H | 0.727600000  | -7.633848000 | 3.627313000  |
| N | 2.926109000  | -6.960407000 | 4.263863000  |
| N | 3.947922000  | -6.512281000 | 5.000095000  |
| C | 4.304833000  | -7.157401000 | 2.268708000  |
| H | 5.129770000  | -6.743699000 | 2.847800000  |
| C | 3.411527000  | -8.068421000 | 0.235430000  |
| H | 3.539215000  | -8.368583000 | -0.807007000 |
| C | 4.504981000  | -7.529770000 | 0.940298000  |
| C | 1.953614000  | -7.832406000 | 2.173589000  |

|   |              |              |              |
|---|--------------|--------------|--------------|
| C | 2.161729000  | -8.207810000 | 0.836648000  |
| H | 1.317909000  | -8.647540000 | 0.300159000  |
| C | 3.060222000  | -7.318694000 | 2.896602000  |
| N | 1.740233000  | -7.035166000 | 4.887357000  |
| C | 5.860576000  | -7.391089000 | 0.295603000  |
| H | 6.533861000  | -8.199932000 | 0.630019000  |
| H | 5.782299000  | -7.444007000 | -0.800122000 |
| H | 6.337368000  | -6.433572000 | 0.557157000  |
| C | 3.384396000  | -6.254521000 | 6.208535000  |
| C | 3.106899000  | -5.556879000 | 8.469696000  |
| H | 3.498395000  | -5.144030000 | 9.402049000  |
| C | 3.958321000  | -5.730135000 | 7.387377000  |
| H | 5.015146000  | -5.460152000 | 7.435434000  |
| C | 1.999781000  | -6.587766000 | 6.139995000  |
| C | 1.725402000  | -5.897354000 | 8.401241000  |
| H | 1.103706000  | -5.739018000 | 9.283606000  |
| C | 1.149028000  | -6.417319000 | 7.253196000  |
| H | 0.088117000  | -6.666875000 | 7.198278000  |
| I | -9.785707000 | 1.957591000  | 2.470707000  |
| F | -8.143195000 | 3.246536000  | 4.979048000  |
| F | -7.218540000 | 1.834064000  | 0.510241000  |
| C | -7.757613000 | 2.509818000  | 2.736450000  |
| C | -7.302448000 | 3.071825000  | 3.929208000  |
| C | -6.834571000 | 2.351541000  | 1.702297000  |
| I | -3.019425000 | 3.849139000  | 3.308929000  |
| F | -4.661938000 | 2.560194000  | 0.800588000  |
| O | 3.745196000  | 2.974070000  | 3.846251000  |
| H | 3.428282000  | 3.918348000  | 3.966852000  |
| N | 1.046167000  | 4.049744000  | 3.988797000  |
| F | -5.586016000 | 3.972231000  | 5.270088000  |
| N | -0.192279000 | 4.551290000  | 4.029552000  |
| C | 0.235623000  | 1.755942000  | 3.946075000  |
| H | -0.774651000 | 2.154724000  | 4.031724000  |
| C | 1.757255000  | -0.087521000 | 3.725733000  |
| H | 1.942891000  | -1.160812000 | 3.644448000  |
| C | 0.434880000  | 0.379450000  | 3.844682000  |
| C | 2.645592000  | 2.179472000  | 3.835741000  |
| C | 2.838065000  | 0.792682000  | 3.730610000  |
| H | 3.863749000  | 0.435182000  | 3.614837000  |
| C | 1.312388000  | 2.657030000  | 3.922695000  |
| N | 2.046341000  | 4.944649000  | 4.036613000  |
| C | -0.735468000 | -0.569279000 | 3.824806000  |
| H | -1.227104000 | -0.561171000 | 2.836054000  |
| H | -0.409777000 | -1.599063000 | 4.035740000  |

|   |               |              |              |
|---|---------------|--------------|--------------|
| H | -1.493359000  | -0.292500000 | 4.574169000  |
| C | -5.047518000  | 3.296913000  | 3.043186000  |
| C | 0.007408000   | 5.890617000  | 4.128841000  |
| C | -0.407640000  | 8.226873000  | 4.348858000  |
| H | -1.085675000  | 9.076230000  | 4.449494000  |
| C | -0.926985000  | 6.944371000  | 4.240128000  |
| H | -2.001318000  | 6.753221000  | 4.257617000  |
| C | 1.411719000   | 6.139411000  | 4.126484000  |
| C | 0.995415000   | 8.472839000  | 4.339988000  |
| H | 1.346811000   | 9.501537000  | 4.429862000  |
| C | 1.925061000   | 7.450201000  | 4.226227000  |
| H | 2.998507000   | 7.638740000  | 4.230927000  |
| C | -5.502684000  | 2.734905000  | 1.850428000  |
| C | -5.971362000  | 3.454710000  | 4.077702000  |
| O | -9.388527000  | 3.259886000  | -4.733635000 |
| H | -9.367175000  | 3.611316000  | -3.794131000 |
| N | -7.168661000  | 4.284771000  | -3.157577000 |
| N | -6.146848000  | 4.732896000  | -2.421346000 |
| C | -5.789938000  | 4.087781000  | -5.152734000 |
| H | -4.964999000  | 4.501478000  | -4.573640000 |
| C | -6.683233000  | 3.176738000  | -7.186030000 |
| H | -6.555571000  | 2.876586000  | -8.228447000 |
| C | -5.589779000  | 3.715404000  | -6.481153000 |
| C | -8.141157000  | 3.412775000  | -5.247852000 |
| C | -7.933038000  | 3.037370000  | -6.584783000 |
| H | -8.776860000  | 2.597635000  | -7.121280000 |
| C | -7.034548000  | 3.926483000  | -4.524838000 |
| N | -8.354536000  | 4.210012000  | -2.534084000 |
| C | -4.234193000  | 3.854085000  | -7.125836000 |
| H | -3.560908000  | 3.045247000  | -6.791421000 |
| H | -4.312471000  | 3.801170000  | -8.221562000 |
| H | -3.757410000  | 4.811602000  | -6.864290000 |
| C | -6.710375000  | 4.990656000  | -1.212905000 |
| C | -6.987870000  | 5.688298000  | 1.048256000  |
| H | -6.596375000  | 6.101148000  | 1.980608000  |
| C | -6.136450000  | 5.515042000  | -0.034063000 |
| H | -5.079623000  | 5.785024000  | 0.013993000  |
| C | -8.094987000  | 4.657411000  | -1.281445000 |
| C | -8.369366000  | 5.347822000  | 0.979800000  |
| H | -8.991064000  | 5.506159000  | 1.862167000  |
| C | -8.945743000  | 4.827858000  | -0.168245000 |
| H | -10.006654000 | 4.578301000  | -0.223163000 |
| I | -7.804378000  | -6.728171000 | -4.635676000 |
| F | -6.161865000  | -5.439226000 | -2.127334000 |

|   |              |              |              |
|---|--------------|--------------|--------------|
| F | -5.237211000 | -6.851699000 | -6.596142000 |
| C | -5.776284000 | -6.175945000 | -4.369933000 |
| C | -5.321120000 | -5.613936000 | -3.177174000 |
| C | -4.853241000 | -6.334222000 | -5.404087000 |
| O | -1.435325000 | -6.138864000 | 3.406863000  |
| H | -1.456673000 | -6.490279000 | 2.467172000  |
| N | -3.655141000 | -7.163803000 | 1.830831000  |
| N | -4.676956000 | -7.611929000 | 1.094599000  |
| C | -5.033865000 | -6.966813000 | 3.825987000  |
| H | -5.858803000 | -7.380510000 | 3.246894000  |
| C | -4.140570000 | -6.055770000 | 5.859284000  |
| C | -5.233449000 | -6.594871000 | 5.155100000  |
| C | -2.682067000 | -6.292256000 | 3.921803000  |
| C | -2.890767000 | -5.916402000 | 5.258036000  |
| H | -2.046368000 | -5.477102000 | 5.795227000  |
| C | -3.788680000 | -6.805950000 | 3.198785000  |
| N | -2.468692000 | -7.089479000 | 1.208030000  |
| C | -4.112854000 | -7.870123000 | -0.113148000 |
| C | -3.836158000 | -8.568244000 | -2.373947000 |
| H | -4.226852000 | -8.980616000 | -3.306662000 |
| C | -4.687352000 | -8.394074000 | -1.292682000 |
| H | -5.743605000 | -8.664492000 | -1.340046000 |
| C | -2.728816000 | -7.536439000 | -0.045303000 |
| C | -2.455239000 | -8.227320000 | -2.306189000 |
| H | -1.832963000 | -8.386103000 | -3.187859000 |
| C | -1.877485000 | -7.707325000 | -1.157832000 |
| H | -0.817078000 | -7.457340000 | -1.103507000 |
| I | -1.038096000 | -4.836623000 | -3.797453000 |
| F | -2.680609000 | -6.125568000 | -6.305795000 |
| O | 5.726524000  | -5.711692000 | -3.260132000 |
| H | 5.409607000  | -4.767422000 | -3.139539000 |
| N | 3.027496000  | -4.636018000 | -3.117586000 |
| F | -3.604696000 | -4.713535000 | -1.836290000 |
| N | 1.789050000  | -4.134472000 | -3.076831000 |
| C | 2.216952000  | -6.929821000 | -3.160308000 |
| H | 1.206678000  | -6.531040000 | -3.074659000 |
| C | 3.738583000  | -8.773284000 | -3.380650000 |
| H | 3.924225000  | -9.846573000 | -3.461935000 |
| C | 2.416206000  | -8.306316000 | -3.261701000 |
| C | 4.626922000  | -6.506291000 | -3.270642000 |
| C | 4.819392000  | -7.893078000 | -3.375773000 |
| H | 5.845077000  | -8.250581000 | -3.491546000 |
| C | 3.293717000  | -6.028734000 | -3.183688000 |
| N | 4.027670000  | -3.741114000 | -3.069770000 |

|   |              |               |              |
|---|--------------|---------------|--------------|
| C | 1.245835000  | -9.255035000  | -3.281568000 |
| H | 0.754306000  | -9.246960000  | -4.270387000 |
| H | 1.571572000  | -10.284847000 | -3.070642000 |
| H | 0.487981000  | -8.978274000  | -2.532192000 |
| C | -3.066190000 | -5.388852000  | -4.063195000 |
| C | 1.988737000  | -2.795146000  | -2.977542000 |
| C | 1.573689000  | -0.458890000  | -2.757525000 |
| H | 0.895653000  | 0.390468000   | -2.656888000 |
| C | 1.054344000  | -1.741390000  | -2.866254000 |
| H | -0.019989000 | -1.932542000  | -2.848765000 |
| C | 3.393048000  | -2.546351000  | -2.979899000 |
| C | 2.976751000  | -0.212926000  | -2.766405000 |
| H | 3.328144000  | 0.815750000   | -2.676528000 |
| C | 3.906391000  | -1.235564000  | -2.880153000 |
| H | 4.979873000  | -1.047032000  | -2.875455000 |
| C | -3.521354000 | -5.950857000  | -5.255955000 |
| C | -3.990031000 | -5.231051000  | -3.028680000 |
| I | 2.901350000  | 9.716782000   | 1.093065000  |
| F | 0.472635000  | 11.874397000  | 1.404579000  |
| F | 0.947228000  | 7.152817000   | 0.854777000  |
| C | 0.792688000  | 9.521733000   | 1.118792000  |
| C | -0.043337000 | 10.625364000  | 1.289560000  |
| C | 0.190846000  | 8.267985000   | 0.998431000  |
| I | -4.138937000 | 9.026422000   | 1.237614000  |
| F | -1.709423000 | 6.869285000   | 0.925738000  |
| F | -2.184807000 | 11.590330000  | 1.475911000  |
| C | -2.029477000 | 9.221950000   | 1.211519000  |
| C | -1.193451000 | 8.118319000   | 1.040754000  |
| C | -1.427627000 | 10.475704000  | 1.331883000  |
| O | 11.123733000 | 2.455153000   | -3.595624000 |
| H | 11.101581000 | 2.103244000   | -4.534765000 |
| N | 8.903067000  | 1.429788000   | -5.171319000 |
| N | 7.882052000  | 0.982142000   | -5.907913000 |
| C | 7.524343000  | 1.626779000   | -3.176162000 |
| H | 6.700205000  | 1.213560000   | -3.755618000 |
| C | 8.418438000  | 2.538300000   | -1.143228000 |
| H | 8.289977000  | 2.837973000   | -0.100449000 |
| C | 7.324185000  | 1.999159000   | -1.847742000 |
| C | 9.876363000  | 2.302263000   | -3.081406000 |
| C | 9.668243000  | 2.677668000   | -1.744476000 |
| H | 10.512066000 | 3.117405000   | -1.207978000 |
| C | 8.769753000  | 1.788555000   | -3.804420000 |
| N | 10.089742000 | 1.505027000   | -5.795174000 |
| C | 5.969361000  | 1.860958000   | -1.203414000 |

|   |              |              |               |
|---|--------------|--------------|---------------|
| H | 5.296118000  | 2.669769000  | -1.537820000  |
| H | 6.048227000  | 1.913446000  | -0.107011000  |
| H | 5.492635000  | 0.903388000  | -1.464932000  |
| C | 8.445580000  | 0.724382000  | -7.116353000  |
| C | 8.722276000  | 0.026261000  | -9.377152000  |
| H | 8.331581000  | -0.386109000 | -10.309867000 |
| C | 7.871655000  | 0.199996000  | -8.295195000  |
| H | 6.815403000  | -0.070422000 | -8.342558000  |
| C | 9.830193000  | 1.057627000  | -7.047813000  |
| C | 10.103773000 | 0.366736000  | -9.308696000  |
| H | 10.725469000 | 0.208401000  | -10.191063000 |
| C | 10.680949000 | 0.887180000  | -8.161014000  |
| H | 11.741058000 | 1.136258000  | -8.105733000  |
| O | -0.284422000 | -3.642410000 | 6.240997000   |
| H | -0.263069000 | -3.290981000 | 7.180501000   |
| N | 1.935444000  | -2.617525000 | 7.817055000   |
| N | 2.957258000  | -2.169400000 | 8.553286000   |
| C | 3.314167000  | -2.814516000 | 5.821898000   |
| H | 4.139106000  | -2.400817000 | 6.400991000   |
| C | 2.420762000  | -3.725788000 | 3.788656000   |
| H | 2.548803000  | -4.025370000 | 2.746162000   |
| C | 3.514340000  | -3.186943000 | 4.493494000   |
| C | 0.962950000  | -3.489526000 | 5.726782000   |
| C | 1.171050000  | -3.864879000 | 4.389841000   |
| H | 0.327258000  | -4.304641000 | 3.853362000   |
| C | 2.069557000  | -2.975813000 | 6.449794000   |
| N | 0.749569000  | -2.692285000 | 8.440548000   |
| C | 4.869916000  | -3.048212000 | 3.848796000   |
| H | 5.543197000  | -3.857050000 | 4.183210000   |
| H | 4.791635000  | -3.101126000 | 2.753069000   |
| H | 5.346692000  | -2.090692000 | 4.110341000   |
| C | 2.393731000  | -1.911640000 | 9.761726000   |
| C | 2.116235000  | -1.213998000 | 12.022887000  |
| H | 2.507730000  | -0.801148000 | 12.955240000  |
| C | 2.967656000  | -1.387253000 | 10.940568000  |
| H | 4.024482000  | -1.117271000 | 10.988625000  |
| C | 1.009118000  | -2.244884000 | 9.693186000   |
| C | 0.734738000  | -1.554473000 | 11.954432000  |
| H | 0.113041000  | -1.396137000 | 12.836798000  |
| C | 0.158363000  | -2.074438000 | 10.806387000  |
| H | -0.902548000 | -2.323994000 | 10.751469000  |
| O | 6.103392000  | 0.181478000  | 2.352222000   |
| H | 6.420296000  | -0.762752000 | 2.231655000   |
| N | 8.802479000  | -0.894120000 | 2.209768000   |

|   |              |              |              |
|---|--------------|--------------|--------------|
| N | 10.040925000 | -1.395666000 | 2.169013000  |
| C | 9.613023000  | 1.399681000  | 2.252490000  |
| H | 10.623298000 | 1.000899000  | 2.166841000  |
| C | 8.091391000  | 3.243145000  | 2.472832000  |
| H | 7.905754000  | 4.316436000  | 2.554117000  |
| C | 9.413767000  | 2.776173000  | 2.353883000  |
| C | 7.203634000  | 0.975709000  | 2.363505000  |
| C | 7.010581000  | 2.362941000  | 2.467958000  |
| H | 5.984897000  | 2.720442000  | 2.583728000  |
| C | 8.536259000  | 0.498594000  | 2.275877000  |
| N | 7.802305000  | -1.789025000 | 2.161953000  |
| C | 10.584140000 | 3.724896000  | 2.373751000  |
| H | 11.074869000 | 3.716343000  | 3.362931000  |
| H | 10.258403000 | 4.754707000  | 2.162824000  |
| H | 11.342005000 | 3.448124000  | 1.624396000  |
| C | 9.841013000  | -2.735908000 | 2.070779000  |
| C | 10.256286000 | -5.071249000 | 1.849707000  |
| H | 10.934321000 | -5.920607000 | 1.749070000  |
| C | 10.774831000 | -3.789227000 | 1.958798000  |
| H | 11.849165000 | -3.598075000 | 1.941309000  |
| C | 8.436927000  | -2.983788000 | 2.072080000  |
| C | 8.853232000  | -5.317215000 | 1.858576000  |
| H | 8.501836000  | -6.345913000 | 1.768703000  |
| C | 7.924159000  | -4.295013000 | 1.973031000  |
| H | 6.850140000  | -4.483116000 | 1.967637000  |
| O | 7.094140000  | -4.161369000 | -1.200768000 |
| H | 7.411008000  | -5.105602000 | -1.321509000 |
| N | 9.793144000  | -5.237001000 | -1.343423000 |
| N | 11.031589000 | -5.738548000 | -1.384179000 |
| C | 10.603687000 | -2.943200000 | -1.300702000 |
| H | 11.613963000 | -3.341982000 | -1.386351000 |
| C | 9.082055000  | -1.099735000 | -1.080374000 |
| H | 8.896419000  | -0.026445000 | -0.999075000 |
| C | 10.404432000 | -1.566708000 | -1.199309000 |
| C | 8.194277000  | -3.367142000 | -1.189705000 |
| C | 8.001191000  | -1.980075000 | -1.085280000 |
| H | 6.975613000  | -1.622249000 | -0.969386000 |
| C | 9.526923000  | -3.844286000 | -1.277337000 |
| N | 8.792969000  | -6.131906000 | -1.391238000 |
| C | 11.574805000 | -0.617985000 | -1.179442000 |
| H | 12.065534000 | -0.626538000 | -0.190261000 |
| H | 11.249068000 | 0.411826000  | -1.390368000 |
| H | 12.332669000 | -0.894758000 | -1.928796000 |
| C | 10.831677000 | -7.078790000 | -1.482412000 |

|   |              |               |              |
|---|--------------|---------------|--------------|
| C | 11.246951000 | -9.414131000  | -1.703485000 |
| H | 11.924986000 | -10.263488000 | -1.804121000 |
| C | 11.765495000 | -8.132108000  | -1.594393000 |
| H | 12.839828000 | -7.940956000  | -1.611882000 |
| C | 9.427592000  | -7.326671000  | -1.481111000 |
| C | 9.843894000  | -9.660096000  | -1.694615000 |
| H | 9.492501000  | -10.688795000 | -1.784488000 |
| C | 8.914824000  | -8.637894000  | -1.580160000 |
| H | 7.840804000  | -8.825997000  | -1.585554000 |
| C | -6.603902000 | -6.723194000  | 5.845747000  |
| H | -7.315732000 | -6.101493000  | 5.344065000  |
| H | -6.929343000 | -7.741727000  | 5.806019000  |
| H | -6.518826000 | -6.415522000  | 6.867021000  |
| H | -4.271584000 | -5.747071000  | 6.875374000  |

S<sub>1</sub> (keto)

|   |              |              |              |
|---|--------------|--------------|--------------|
| O | 4.864996000  | -1.188732000 | -0.091735000 |
| H | 4.231013000  | 0.466594000  | 0.725176000  |
| N | 2.317279000  | -0.171059000 | 0.372516000  |
| N | 1.088504000  | 0.341315000  | 0.311017000  |
| C | 1.545391000  | -2.436159000 | 0.603578000  |
| H | 0.557274000  | -2.045629000 | 0.811808000  |
| C | 3.014967000  | -4.315684000 | 0.250688000  |
| H | 3.187205000  | -5.380362000 | 0.156007000  |
| C | 1.731709000  | -3.847783000 | 0.457559000  |
| C | 3.918470000  | -2.027906000 | 0.146218000  |
| C | 4.097993000  | -3.430498000 | 0.130029000  |
| H | 5.088185000  | -3.788337000 | -0.131707000 |
| C | 2.578754000  | -1.574206000 | 0.412663000  |
| N | 3.244332000  | 0.763855000  | 0.716877000  |
| C | 0.535995000  | -4.748645000 | 0.488904000  |
| H | -0.138952000 | -4.520339000 | -0.346095000 |
| H | 0.831831000  | -5.795289000 | 0.415263000  |
| H | -0.046348000 | -4.631245000 | 1.409239000  |
| C | 1.246463000  | 1.663800000  | 0.488365000  |
| C | 0.727118000  | 3.980204000  | 0.716245000  |
| H | 0.024806000  | 4.806640000  | 0.748406000  |
| C | 0.279479000  | 2.691510000  | 0.516436000  |
| H | -0.771632000 | 2.464554000  | 0.385686000  |
| C | 2.616454000  | 1.962900000  | 0.702607000  |
| C | 2.101621000  | 4.267569000  | 0.863964000  |
| H | 2.392137000  | 5.301959000  | 0.985280000  |
| C | 3.065424000  | 3.271420000  | 0.865297000  |
| H | 4.117165000  | 3.480007000  | 0.997524000  |



|   |              |              |              |
|---|--------------|--------------|--------------|
| I | -8.802268000 | -2.383661000 | -1.080612000 |
| F | -7.158909000 | -1.094849000 | 1.427244000  |
| F | -6.235477000 | -2.508339000 | -3.041494000 |
| C | -6.773950000 | -1.832053000 | -0.815302000 |
| C | -6.318398000 | -1.270002000 | 0.377288000  |
| C | -5.851135000 | -1.990795000 | -1.849588000 |
| O | -2.431603000 | -1.795193000 | 6.960773000  |
| H | -2.453231000 | -2.146768000 | 6.021329000  |
| N | -4.652072000 | -2.819608000 | 5.385258000  |
| N | -5.674156000 | -3.267518000 | 4.649273000  |
| C | -6.030390000 | -2.621848000 | 7.380618000  |
| H | -6.855563000 | -3.035370000 | 6.801732000  |
| C | -5.136453000 | -1.710771000 | 9.413616000  |
| H | -5.264640000 | -1.410889000 | 10.456370000 |
| C | -6.229628000 | -2.249629000 | 8.709705000  |
| C | -3.678360000 | -1.948030000 | 7.475920000  |
| C | -3.886706000 | -1.571907000 | 8.812133000  |
| H | -3.042073000 | -1.132795000 | 9.349109000  |
| C | -4.785260000 | -2.461492000 | 6.753177000  |
| N | -3.465704000 | -2.745771000 | 4.762245000  |
| C | -7.585723000 | -2.387330000 | 9.353949000  |
| H | -8.258801000 | -1.578326000 | 9.019519000  |
| H | -7.506667000 | -2.334701000 | 10.450345000 |
| H | -8.062288000 | -3.345170000 | 9.093328000  |
| C | -5.110346000 | -3.526090000 | 3.441470000  |
| C | -4.834262000 | -4.224662000 | 1.180736000  |
| H | -5.225250000 | -4.637057000 | 0.248155000  |
| C | -5.685216000 | -4.050043000 | 2.262118000  |
| H | -6.741565000 | -4.320124000 | 2.214977000  |
| C | -3.726172000 | -3.192916000 | 3.509049000  |
| C | -3.453220000 | -3.884234000 | 1.248214000  |
| H | -2.831265000 | -4.043340000 | 0.366419000  |
| C | -2.875128000 | -3.364083000 | 2.396432000  |
| H | -1.814518000 | -3.114581000 | 2.450441000  |
| I | -2.035098000 | -0.494181000 | -0.243769000 |
| F | -3.678588000 | -1.782994000 | -2.751700000 |
| F | -4.601445000 | -0.369940000 | 1.717731000  |
| C | -4.063541000 | -1.045818000 | -0.509146000 |
| C | -4.519095000 | -1.607853000 | -1.701739000 |
| C | -4.987165000 | -0.887503000 | 0.525488000  |
| O | -8.405892000 | -1.082650000 | -8.285229000 |
| H | -8.384267000 | -0.731075000 | -7.345786000 |
| N | -6.185425000 | -0.058236000 | -6.709715000 |
| N | -5.163340000 | 0.389675000  | -5.973729000 |

|   |              |              |               |
|---|--------------|--------------|---------------|
| C | -4.807105000 | -0.255994000 | -8.705074000  |
| H | -3.981934000 | 0.157528000  | -8.126187000  |
| C | -5.701044000 | -1.167071000 | -10.738073000 |
| H | -5.573657000 | -1.467433000 | -11.780462000 |
| C | -4.607294000 | -0.628649000 | -10.033468000 |
| C | -7.158561000 | -0.930249000 | -8.799684000  |
| C | -6.950791000 | -1.305936000 | -10.136589000 |
| H | -7.794849000 | -1.745483000 | -10.672872000 |
| C | -6.051661000 | -0.416786000 | -8.076940000  |
| N | -7.371219000 | -0.132510000 | -6.086008000  |
| C | -3.251773000 | -0.490512000 | -10.678404000 |
| H | -2.578696000 | -1.299517000 | -10.343974000 |
| H | -3.330255000 | -0.543578000 | -11.774108000 |
| H | -2.774634000 | 0.466891000  | -10.417092000 |
| C | -5.726577000 | 0.647812000  | -4.765234000  |
| C | -6.003460000 | 1.345906000  | -2.504136000  |
| H | -5.611671000 | 1.758779000  | -1.571917000  |
| C | -5.152280000 | 1.172200000  | -3.586574000  |
| H | -4.095357000 | 1.441846000  | -3.538740000  |
| C | -7.111310000 | 0.315007000  | -4.833484000  |
| C | -7.385079000 | 1.005870000  | -2.572302000  |
| H | -8.006573000 | 1.164550000  | -1.689856000  |
| C | -7.961819000 | 0.485909000  | -3.720166000  |
| H | -9.022821000 | 0.236689000  | -3.774863000  |
| I | 3.887080000  | 5.371177000  | -2.461660000  |
| F | 1.459119000  | 7.529632000  | -2.150078000  |
| O | 10.129008000 | 6.793666000  | -0.045258000  |
| H | 10.106581000 | 6.441613000  | -0.984337000  |
| N | 7.907740000  | 5.768772000  | -1.620409000  |
| F | 1.932072000  | 2.807867000  | -2.699208000  |
| N | 6.886456000  | 5.321340000  | -2.356758000  |
| C | 6.529421000  | 5.966532000  | 0.374951000   |
| H | 5.705049000  | 5.553488000  | -0.204298000  |
| C | 7.424160000  | 6.878089000  | 2.407586000   |
| H | 7.295973000  | 7.177968000  | 3.450339000   |
| C | 6.329615000  | 6.339181000  | 1.703354000   |
| C | 8.881676000  | 6.641264000  | 0.469198000   |
| C | 8.673906000  | 7.016951000  | 1.806103000   |
| H | 9.517964000  | 7.456499000  | 2.342386000   |
| C | 7.774777000  | 6.127802000  | -0.253546000  |
| N | 9.094334000  | 5.843525000  | -2.244478000  |
| C | 4.974664000  | 6.201672000  | 2.347798000   |
| H | 4.301826000  | 7.010533000  | 2.013460000   |
| H | 5.053938000  | 6.254161000  | 3.444316000   |

|   |              |              |              |
|---|--------------|--------------|--------------|
| H | 4.498026000  | 5.243750000  | 2.086706000  |
| C | 1.778359000  | 5.176818000  | -2.435536000 |
| C | 7.449693000  | 5.063204000  | -3.565253000 |
| C | 7.725776000  | 4.364631000  | -5.825987000 |
| H | 7.334787000  | 3.952237000  | -6.758568000 |
| C | 6.875396000  | 4.538815000  | -4.743912000 |
| H | 5.819048000  | 4.268734000  | -4.791052000 |
| C | 8.834425000  | 5.396008000  | -3.497002000 |
| C | 9.107394000  | 4.704667000  | -5.757821000 |
| H | 9.728889000  | 4.545987000  | -6.640268000 |
| C | 9.684935000  | 5.225107000  | -4.610321000 |
| H | 10.745137000 | 5.473848000  | -4.555260000 |
| C | 0.942720000  | 6.280750000  | -2.264807000 |
| C | 1.176080000  | 3.923241000  | -2.555596000 |
| I | -3.153408000 | 4.683134000  | -2.315800000 |
| F | -0.724649000 | 2.525156000  | -2.627744000 |
| F | -1.198405000 | 7.246442000  | -2.078246000 |
| C | -1.043889000 | 4.877970000  | -2.342286000 |
| C | -0.208251000 | 3.774040000  | -2.513014000 |
| C | -0.441609000 | 6.131547000  | -2.222225000 |
| O | 0.697842000  | -7.986142000 | 2.688963000  |
| H | 0.719468000  | -7.634564000 | 3.628404000  |
| N | 2.918304000  | -6.961738000 | 4.264472000  |
| N | 3.940388000  | -6.513826000 | 5.000458000  |
| C | 4.296627000  | -7.159505000 | 2.269115000  |
| H | 5.121794000  | -6.745975000 | 2.847999000  |
| C | 3.402676000  | -8.070561000 | 0.236137000  |
| H | 3.530087000  | -8.370926000 | -0.806277000 |
| C | 4.496415000  | -7.532133000 | 0.940723000  |
| C | 1.945168000  | -7.833756000 | 2.174502000  |
| C | 2.152933000  | -8.209440000 | 0.837587000  |
| H | 1.308879000  | -8.648982000 | 0.301312000  |
| C | 3.052067000  | -7.320287000 | 2.897245000  |
| N | 1.732510000  | -7.036010000 | 4.888180000  |
| C | 5.851956000  | -7.394016000 | 0.295785000  |
| H | 6.525033000  | -8.203019000 | 0.630213000  |
| H | 5.773473000  | -7.447080000 | -0.799922000 |
| H | 6.329102000  | -6.436607000 | 0.557099000  |
| C | 3.377152000  | -6.255689000 | 6.208952000  |
| C | 3.100268000  | -5.557595000 | 8.470049000  |
| H | 3.492057000  | -5.144724000 | 9.402269000  |
| C | 3.951449000  | -5.731301000 | 7.387613000  |
| H | 5.008370000  | -5.461655000 | 7.435446000  |
| C | 1.992417000  | -6.588494000 | 6.140702000  |

|   |              |              |             |
|---|--------------|--------------|-------------|
| C | 1.718649000  | -5.897631000 | 8.401884000 |
| H | 1.097155000  | -5.738951000 | 9.284329000 |
| C | 1.141910000  | -6.417592000 | 7.254020000 |
| H | 0.080908000  | -6.666811000 | 7.199323000 |
| I | -9.790913000 | 1.960112000  | 2.472053000 |
| F | -8.147554000 | 3.248924000  | 4.979907000 |
| F | -7.224121000 | 1.835435000  | 0.511169000 |
| C | -7.762594000 | 2.511721000  | 2.737362000 |
| C | -7.307043000 | 3.073771000  | 3.929952000 |
| C | -6.839780000 | 2.352978000  | 1.703077000 |
| I | -3.023873000 | 3.849591000  | 3.308819000 |
| F | -4.667233000 | 2.560779000  | 0.800964000 |
| O | 3.740553000  | 2.972405000  | 3.845127000 |
| H | 3.423963000  | 3.916816000  | 3.965636000 |
| N | 1.041900000  | 4.048981000  | 3.987961000 |
| F | -5.590089000 | 3.973833000  | 5.270395000 |
| N | -0.196375000 | 4.550937000  | 4.028847000 |
| C | 0.230602000  | 1.755436000  | 3.945745000 |
| H | -0.779527000 | 2.154561000  | 4.031502000 |
| C | 1.751596000  | -0.088558000 | 3.725439000 |
| H | 1.936865000  | -1.161923000 | 3.644294000 |
| C | 0.429394000  | 0.378863000  | 3.844539000 |
| C | 2.640690000  | 2.178164000  | 3.834933000 |
| C | 2.832694000  | 0.791294000  | 3.729991000 |
| H | 3.858241000  | 0.433442000  | 3.614101000 |
| C | 1.307656000  | 2.656170000  | 3.922037000 |
| N | 2.042374000  | 4.943568000  | 4.035464000 |
| C | -0.741264000 | -0.569488000 | 3.825013000 |
| H | -1.233089000 | -0.561371000 | 2.836342000 |
| H | -0.415874000 | -1.599343000 | 4.036056000 |
| H | -1.498940000 | -0.292342000 | 4.574462000 |
| C | -5.052191000 | 3.297983000  | 3.043510000 |
| C | 0.003765000  | 5.890214000  | 4.127887000 |
| C | -0.410485000 | 8.226641000  | 4.347601000 |
| H | -1.088226000 | 9.076235000  | 4.448216000 |
| C | -0.930266000 | 6.944290000  | 4.239165000 |
| H | -2.004659000 | 6.753493000  | 4.256868000 |
| C | 1.408156000  | 6.138551000  | 4.125251000 |
| C | 0.992648000  | 8.472148000  | 4.338452000 |
| H | 1.344395000  | 9.500746000  | 4.428101000 |
| C | 1.921942000  | 7.449189000  | 4.224697000 |
| H | 2.995450000  | 7.637380000  | 4.229183000 |
| C | -5.507743000 | 2.735932000  | 1.850919000 |
| C | -5.975807000 | 3.456246000  | 4.078158000 |

|   |               |              |              |
|---|---------------|--------------|--------------|
| O | -9.394537000  | 3.261123000  | -4.732565000 |
| H | -9.372911000  | 3.612697000  | -3.793121000 |
| N | -7.174069000  | 4.285538000  | -3.157050000 |
| N | -6.151985000  | 4.733448000  | -2.421065000 |
| C | -5.795750000  | 4.087779000  | -5.152410000 |
| H | -4.970578000  | 4.501300000  | -4.573523000 |
| C | -6.689689000  | 3.176701000  | -7.185408000 |
| H | -6.562302000  | 2.876341000  | -8.227799000 |
| C | -5.595939000  | 3.715124000  | -6.480804000 |
| C | -8.147205000  | 3.413524000  | -5.247019000 |
| C | -7.939437000  | 3.037837000  | -6.583926000 |
| H | -8.783493000  | 2.598291000  | -7.120208000 |
| C | -7.040306000  | 3.926987000  | -4.524276000 |
| N | -8.359862000  | 4.211265000  | -2.533343000 |
| C | -4.240418000  | 3.853260000  | -7.125740000 |
| H | -3.567339000  | 3.044257000  | -6.791310000 |
| H | -4.318900000  | 3.800195000  | -8.221444000 |
| H | -3.763279000  | 4.810664000  | -6.864429000 |
| C | -6.715222000  | 4.991585000  | -1.212569000 |
| C | -6.992104000  | 5.689680000  | 1.048527000  |
| H | -6.600316000  | 6.102552000  | 1.980746000  |
| C | -6.140925000  | 5.515973000  | -0.033909000 |
| H | -5.084002000  | 5.785619000  | 0.013923000  |
| C | -8.099954000  | 4.658780000  | -1.280820000 |
| C | -8.373723000  | 5.349643000  | 0.980361000  |
| H | -8.995218000  | 5.508323000  | 1.862809000  |
| C | -8.950465000  | 4.829682000  | -0.167502000 |
| H | -10.011466000 | 4.580462000  | -0.222199000 |
| I | -7.813624000  | -6.727433000 | -4.633275000 |
| F | -6.170264000  | -5.438621000 | -2.125420000 |
| F | -5.246832000  | -6.852111000 | -6.594159000 |
| C | -5.785305000  | -6.175825000 | -4.367967000 |
| C | -5.329755000  | -5.613773000 | -3.175375000 |
| C | -4.862490000  | -6.334568000 | -5.402252000 |
| O | -1.443003000  | -6.138920000 | 3.408084000  |
| H | -1.464638000  | -6.490463000 | 2.468459000  |
| N | -3.663427000  | -7.163380000 | 1.832594000  |
| N | -4.685513000  | -7.611291000 | 1.096608000  |
| C | -5.041746000  | -6.965622000 | 3.827953000  |
| H | -5.866918000  | -7.379143000 | 3.249067000  |
| C | -4.147808000  | -6.054544000 | 5.860952000  |
| C | -5.240983000  | -6.593402000 | 5.157041000  |
| C | -2.689710000  | -6.291819000 | 3.923265000  |
| C | -2.898062000  | -5.915679000 | 5.259469000  |

|   |              |               |              |
|---|--------------|---------------|--------------|
| H | -2.053429000 | -5.476568000  | 5.796445000  |
| C | -3.796616000 | -6.805265000  | 3.200513000  |
| N | -2.477060000 | -7.089542000  | 1.209579000  |
| C | -4.121701000 | -7.869863000  | -0.111194000 |
| C | -3.845618000 | -8.568436000  | -2.371928000 |
| H | -4.236605000 | -8.980830000  | -3.304510000 |
| C | -4.696571000 | -8.393816000  | -1.290546000 |
| H | -5.752920000 | -8.663897000  | -1.337686000 |
| C | -2.737543000 | -7.536619000  | -0.043638000 |
| C | -2.464576000 | -8.227951000  | -2.304460000 |
| H | -1.842502000 | -8.387078000  | -3.186210000 |
| C | -1.886457000 | -7.707960000  | -1.156285000 |
| H | -0.825960000 | -7.458312000  | -1.102180000 |
| I | -1.046584000 | -4.837954000  | -3.796509000 |
| F | -2.689944000 | -6.126766000  | -6.304364000 |
| O | 5.717845000  | -5.715139000  | -3.260203000 |
| H | 5.401259000  | -4.770750000  | -3.139708000 |
| N | 3.019189000  | -4.638564000  | -3.117367000 |
| F | -3.612809000 | -4.713716000  | -1.834928000 |
| N | 1.780914000  | -4.136609000  | -3.076481000 |
| C | 2.207891000  | -6.932110000  | -3.159583000 |
| H | 1.197762000  | -6.532986000  | -3.073826000 |
| C | 3.728884000  | -8.776104000  | -3.379889000 |
| H | 3.914163000  | -9.849466000  | -3.461034000 |
| C | 2.406680000  | -8.308686000  | -3.260789000 |
| C | 4.617980000  | -6.509383000  | -3.270396000 |
| C | 4.809981000  | -7.896249000  | -3.375337000 |
| H | 5.835529000  | -8.254105000  | -3.491228000 |
| C | 3.284946000  | -6.031378000  | -3.183291000 |
| N | 4.019663000  | -3.743979000  | -3.069865000 |
| C | 1.235997000  | -9.257027000  | -3.280305000 |
| H | 0.744302000  | -9.248951000  | -4.269041000 |
| H | 1.561434000  | -10.286911000 | -3.069269000 |
| H | 0.478360000  | -8.979899000  | -2.530844000 |
| C | -3.074903000 | -5.389566000  | -4.061817000 |
| C | 1.981054000  | -2.797332000  | -2.977441000 |
| C | 1.566804000  | -0.460906000  | -2.757728000 |
| H | 0.889062000  | 0.388689000   | -2.657111000 |
| C | 1.047023000  | -1.743254000  | -2.866163000 |
| H | -0.027369000 | -1.934053000  | -2.848460000 |
| C | 3.385445000  | -2.548995000  | -2.980077000 |
| C | 2.969944000  | -0.215400000  | -2.766886000 |
| H | 3.321688000  | 0.813176000   | -2.677234000 |
| C | 3.899232000  | -1.238359000  | -2.880629000 |

|   |              |              |               |
|---|--------------|--------------|---------------|
| H | 4.972776000  | -1.050176000 | -2.876144000  |
| C | -3.530453000 | -5.951613000 | -5.254409000  |
| C | -3.998516000 | -5.231298000 | -3.027169000  |
| I | 2.898435000  | 9.714950000  | 1.091005000   |
| F | 0.470475000  | 11.873406000 | 1.402587000   |
| F | 0.943406000  | 7.151593000  | 0.853411000   |
| C | 0.789712000  | 9.520591000  | 1.117139000   |
| C | -0.045923000 | 10.624523000 | 1.287856000   |
| C | 0.187456000  | 8.267026000  | 0.997087000   |
| I | -4.142052000 | 9.026906000  | 1.236865000   |
| F | -1.713294000 | 6.868928000  | 0.924920000   |
| F | -2.187047000 | 11.590216000 | 1.474418000   |
| C | -2.032533000 | 9.221743000  | 1.210379000   |
| C | -1.196896000 | 8.117812000  | 1.039646000   |
| C | -1.430254000 | 10.475320000 | 1.330439000   |
| O | 11.117653000 | 2.449893000  | -3.597921000  |
| H | 11.095227000 | 2.097841000  | -4.537002000  |
| N | 8.896385000  | 1.424999000  | -5.173073000  |
| N | 7.875099000  | 0.977567000  | -5.909422000  |
| C | 7.518065000  | 1.622758000  | -3.177713000  |
| H | 6.693694000  | 1.209715000  | -3.756962000  |
| C | 8.412804000  | 2.534314000  | -1.145078000  |
| H | 8.284618000  | 2.834196000  | -0.102325000  |
| C | 7.318257000  | 1.995399000  | -1.849318000  |
| C | 9.870321000  | 2.297492000  | -3.083466000  |
| C | 9.662551000  | 2.673179000  | -1.746561000  |
| H | 10.506609000 | 3.112727000  | -1.210277000  |
| C | 8.763421000  | 1.784028000  | -3.806209000  |
| N | 10.082978000 | 1.499751000  | -5.797143000  |
| C | 5.963427000  | 1.857592000  | -1.204725000  |
| H | 5.290510000  | 2.666776000  | -1.539164000  |
| H | 6.042511000  | 1.910683000  | -0.108306000  |
| H | 5.486389000  | 0.900315000  | -1.466020000  |
| C | 8.438337000  | 0.719430000  | -7.117916000  |
| C | 8.714420000  | 0.020857000  | -9.378651000  |
| H | 8.323432000  | -0.391535000 | -10.311233000 |
| C | 7.864040000  | 0.195042000  | -8.296577000  |
| H | 6.807692000  | -0.075039000 | -8.343716000  |
| C | 9.823070000  | 1.052235000  | -7.049666000  |
| C | 10.096039000 | 0.360893000  | -9.310485000  |
| H | 10.717533000 | 0.202214000  | -10.192932000 |
| C | 10.673580000 | 0.881333000  | -8.162984000  |
| H | 11.733780000 | 1.130075000  | -8.107924000  |
| O | -0.290809000 | -3.642379000 | 6.241621000   |

|   |              |              |              |
|---|--------------|--------------|--------------|
| H | -0.269182000 | -3.290806000 | 7.181065000  |
| N | 1.929659000  | -2.617964000 | 7.817136000  |
| N | 2.951744000  | -2.170054000 | 8.553121000  |
| C | 3.307977000  | -2.815724000 | 5.821776000  |
| H | 4.133150000  | -2.402200000 | 6.400662000  |
| C | 2.413906000  | -3.727046000 | 3.788835000  |
| H | 2.541703000  | -4.026759000 | 2.746306000  |
| C | 3.507804000  | -3.188432000 | 4.493399000  |
| C | 0.956525000  | -3.489984000 | 5.727169000  |
| C | 1.164278000  | -3.865629000 | 4.390254000  |
| H | 0.320237000  | -4.305194000 | 3.853986000  |
| C | 2.063422000  | -2.976515000 | 6.449910000  |
| N | 0.743866000  | -2.692238000 | 8.440843000  |
| C | 4.863314000  | -3.050242000 | 3.848446000  |
| H | 5.536389000  | -3.859246000 | 4.182875000  |
| H | 4.784829000  | -3.103306000 | 2.752741000  |
| H | 5.340446000  | -2.092836000 | 4.109757000  |
| C | 2.388507000  | -1.911917000 | 9.761616000  |
| C | 2.111624000  | -1.213822000 | 12.022713000 |
| H | 2.503412000  | -0.800950000 | 12.954933000 |
| C | 2.962804000  | -1.387528000 | 10.940276000 |
| H | 4.019726000  | -1.117882000 | 10.988110000 |
| C | 1.003774000  | -2.244721000 | 9.693365000  |
| C | 0.730004000  | -1.553858000 | 11.954548000 |
| H | 0.108510000  | -1.395178000 | 12.836994000 |
| C | 0.153264000  | -2.073819000 | 10.806684000 |
| H | -0.907737000 | -2.323039000 | 10.751987000 |
| O | 6.097586000  | 0.178806000  | 2.351145000  |
| H | 6.414162000  | -0.765546000 | 2.230675000  |
| N | 8.796299000  | -0.897694000 | 2.208403000  |
| N | 10.034574000 | -1.399649000 | 2.167517000  |
| C | 9.607597000  | 1.395850000  | 2.250619000  |
| H | 10.617727000 | 0.996725000  | 2.164862000  |
| C | 8.086603000  | 3.239845000  | 2.470925000  |
| H | 7.901329000  | 4.313209000  | 2.552070000  |
| C | 9.408806000  | 2.772423000  | 2.351825000  |
| C | 7.198089000  | 0.972681000  | 2.362113000  |
| C | 7.005505000  | 2.359992000  | 2.466376000  |
| H | 5.979957000  | 2.717846000  | 2.582264000  |
| C | 8.530543000  | 0.495118000  | 2.274334000  |
| N | 7.795825000  | -1.792281000 | 2.160902000  |
| C | 10.579491000 | 3.720768000  | 2.371342000  |
| H | 11.070386000 | 3.712214000  | 3.360440000  |
| H | 10.254054000 | 4.750651000  | 2.160305000  |



|   |              |               |              |
|---|--------------|---------------|--------------|
| H | 11.337138000 | 3.443629000   | 1.621902000  |
| C | 9.834209000  | -2.739842000  | 2.069532000  |
| C | 10.248684000 | -5.075353000  | 1.848764000  |
| H | 10.926425000 | -5.924948000  | 1.748147000  |
| C | 10.767665000 | -3.793483000  | 1.957561000  |
| H | 11.842058000 | -3.602684000  | 1.939858000  |
| C | 8.430043000  | -2.987265000  | 2.071112000  |
| C | 8.845552000  | -5.320861000  | 1.857911000  |
| H | 8.493805000  | -6.349459000  | 1.768263000  |
| C | 7.916831000  | -4.298338000  | 1.972361000  |
| H | 6.842750000  | -4.486092000  | 1.967180000  |
| O | 7.086253000  | -4.164911000  | -1.201368000 |
| H | 7.402873000  | -5.109286000  | -1.321930000 |
| N | 9.784944000  | -5.241466000  | -1.344261000 |
| N | 11.023218000 | -5.743423000  | -1.385147000 |
| C | 10.596241000 | -2.947922000  | -1.302046000 |
| H | 11.606372000 | -3.347047000  | -1.387803000 |
| C | 9.075247000  | -1.103927000  | -1.081754000 |
| H | 8.889974000  | -0.030563000  | -1.000595000 |
| C | 10.397451000 | -1.571349000  | -1.200839000 |
| C | 8.186720000  | -3.371073000  | -1.190547000 |
| C | 7.994095000  | -1.983915000  | -1.086348000 |
| H | 6.968654000  | -1.625737000  | -0.970323000 |
| C | 9.519188000  | -3.848655000  | -1.278343000 |
| N | 8.784469000  | -6.136053000  | -1.391762000 |
| C | 11.568136000 | -0.623004000  | -1.181324000 |
| H | 12.059031000 | -0.631559000  | -0.192225000 |
| H | 11.242699000 | 0.406879000   | -1.392359000 |
| H | 12.325783000 | -0.900144000  | -1.930763000 |
| C | 10.822853000 | -7.083616000  | -1.483132000 |
| C | 11.237329000 | -9.419127000  | -1.703901000 |
| H | 11.915070000 | -10.268721000 | -1.804516000 |
| C | 11.756309000 | -8.137256000  | -1.595103000 |
| H | 12.830701000 | -7.946456000  | -1.612806000 |
| C | 9.418688000  | -7.331039000  | -1.481551000 |
| C | 9.834194000  | -9.664634000  | -1.694752000 |
| H | 9.482450000  | -10.693233000 | -1.784401000 |
| C | 8.905476000  | -8.642111000  | -1.580303000 |
| H | 7.831394000  | -8.829865000  | -1.585484000 |
| C | -6.611359000 | -6.721168000  | 5.847942000  |
| H | -7.323073000 | -6.099315000  | 5.346282000  |
| H | -6.937139000 | -7.739601000  | 5.808433000  |
| H | -6.526009000 | -6.413360000  | 6.869152000  |
| H | -4.278548000 | -5.745639000  | 6.877015000  |

**UVF (A.C)** $S_0$ 

|   |               |              |              |
|---|---------------|--------------|--------------|
| N | 0.588243000   | -0.950633000 | -0.125949000 |
| N | 0.036138000   | 0.247179000  | 0.019025000  |
| O | -1.774059000  | -1.988542000 | 0.534680000  |
| H | -0.840779000  | -2.078253000 | 0.247024000  |
| N | 0.860655000   | 1.279173000  | 0.007221000  |
| C | -1.924365000  | 1.678700000  | 0.007794000  |
| H | -1.254335000  | 2.515392000  | -0.147028000 |
| C | 1.903840000   | -0.687477000 | -0.246908000 |
| C | -3.869663000  | 3.266040000  | -0.074628000 |
| H | -3.404928000  | 3.802276000  | -0.904613000 |
| H | -4.950207000  | 3.228978000  | -0.238259000 |
| H | -3.675806000  | 3.839254000  | 0.832701000  |
| C | 4.407986000   | 0.447202000  | -0.510666000 |
| H | 5.409376000   | 0.846612000  | -0.621654000 |
| C | 4.222806000   | -0.967186000 | -0.614121000 |
| H | 5.076109000   | -1.580443000 | -0.872955000 |
| C | 2.992515000   | -1.557877000 | -0.461341000 |
| H | 2.843548000   | -2.629395000 | -0.496493000 |
| C | 2.074297000   | 0.714892000  | -0.171228000 |
| C | -4.116589000  | 0.774178000  | 0.313855000  |
| H | -5.193489000  | 0.892913000  | 0.359947000  |
| C | -2.204922000  | -0.714221000 | 0.372902000  |
| C | -1.380258000  | 0.397773000  | 0.138534000  |
| C | -3.295257000  | 1.883110000  | 0.073652000  |
| C | 3.356659000   | 1.303911000  | -0.290693000 |
| H | 3.486289000   | 2.380751000  | -0.260919000 |
| C | -3.578559000  | -0.490181000 | 0.478617000  |
| H | -4.220956000  | -1.338080000 | 0.683716000  |
| N | -10.392109000 | 5.564736000  | -0.902640000 |
| N | -9.978111000  | 6.839890000  | -0.781409000 |
| O | -7.953873000  | 4.796839000  | -0.354014000 |
| H | -8.926116000  | 4.703124000  | -0.573743000 |
| N | -10.927002000 | 7.777588000  | -0.760742000 |
| C | -8.188878000  | 8.483935000  | -0.810692000 |
| H | -8.959238000  | 9.232694000  | -0.982634000 |
| C | -11.741331000 | 5.673483000  | -0.969554000 |
| C | -6.393458000  | 10.266249000 | -0.902868000 |
| H | -6.942241000  | 10.757203000 | -1.719956000 |
| H | -5.317792000  | 10.306421000 | -1.129297000 |
| H | -6.578539000  | 10.854060000 | 0.010913000  |
| C | -14.385809000 | 6.498008000  | -1.032837000 |

|   |               |              |              |
|---|---------------|--------------|--------------|
| H | -15.439838000 | 6.777584000  | -1.058561000 |
| C | -14.043438000 | 5.119179000  | -1.150852000 |
| H | -14.847126000 | 4.393365000  | -1.282645000 |
| C | -12.729043000 | 4.682384000  | -1.126201000 |
| H | -12.452791000 | 3.637475000  | -1.243749000 |
| C | -12.074340000 | 7.058886000  | -0.877250000 |
| C | -5.909599000  | 7.819166000  | -0.464373000 |
| H | -4.854144000  | 8.075372000  | -0.376936000 |
| C | -7.647072000  | 6.117263000  | -0.457060000 |
| C | -8.595655000  | 7.147471000  | -0.679568000 |
| C | -6.843132000  | 8.840117000  | -0.723561000 |
| C | -13.420306000 | 7.485720000  | -0.904900000 |
| H | -13.678641000 | 8.542196000  | -0.829674000 |
| C | -6.300818000  | 6.491970000  | -0.327829000 |
| H | -5.571105000  | 5.707435000  | -0.122790000 |
| F | 1.505360000   | 4.186896000  | -0.919459000 |
| F | 2.586868000   | 9.564069000  | -1.218954000 |
| F | 0.006253000   | 10.083466000 | -1.101461000 |
| F | -1.038133000  | 4.706909000  | -0.714253000 |
| F | 4.027280000   | 5.082859000  | -1.234106000 |
| F | -3.021125000  | 6.504649000  | -0.592722000 |
| F | 4.557609000   | 7.749043000  | -1.347251000 |
| F | -2.514949000  | 9.171047000  | -0.796749000 |
| C | 0.899238000   | 7.846321000  | -1.050171000 |
| C | 0.624373000   | 6.428815000  | -0.951978000 |
| C | -1.490856000  | 8.302804000  | -0.846790000 |
| C | -0.720594000  | 6.016465000  | -0.797394000 |
| C | 3.007060000   | 5.958802000  | -1.162717000 |
| C | 1.708547000   | 5.518168000  | -1.015752000 |
| C | -1.753655000  | 6.925670000  | -0.740123000 |
| C | 2.249806000   | 8.251777000  | -1.181807000 |
| C | -0.190699000  | 8.749496000  | -0.997831000 |
| C | 3.277208000   | 7.336336000  | -1.240299000 |
| N | -10.112251000 | -0.504848000 | -3.372924000 |
| N | -9.698254000  | 0.770305000  | -3.251693000 |
| O | -7.674018000  | -1.272739000 | -2.824300000 |
| H | -8.646217000  | -1.367386000 | -3.044403000 |
| N | -10.647146000 | 1.708003000  | -3.231026000 |
| C | -7.909021000  | 2.414351000  | -3.280975000 |
| H | -8.679380000  | 3.163109000  | -3.452918000 |
| C | -11.461475000 | -0.396101000 | -3.439837000 |
| C | -6.113534000  | 4.195789000  | -3.373555000 |
| H | -6.662342000  | 4.686693000  | -4.190616000 |
| H | -5.037936000  | 4.236837000  | -3.599581000 |

|   |               |              |              |
|---|---------------|--------------|--------------|
| H | -6.298661000  | 4.783487000  | -2.459715000 |
| C | -14.105910000 | 0.427498000  | -3.503497000 |
| H | -15.159981000 | 0.708000000  | -3.528845000 |
| C | -13.763537000 | -0.951331000 | -3.621512000 |
| H | -14.567226000 | -1.677145000 | -3.753305000 |
| C | -12.449143000 | -1.388126000 | -3.596861000 |
| H | -12.172892000 | -2.433035000 | -3.714409000 |
| C | -11.794441000 | 0.988376000  | -3.347911000 |
| C | -5.629695000  | 1.748652000  | -2.935062000 |
| H | -4.574288000  | 2.005786000  | -2.847220000 |
| C | -7.367174000  | 0.046755000  | -2.927704000 |
| C | -8.315798000  | 1.077886000  | -3.149852000 |
| C | -6.563232000  | 2.769607000  | -3.194221000 |
| C | -13.140450000 | 1.416135000  | -3.375184000 |
| H | -13.398784000 | 2.472612000  | -3.299958000 |
| C | -6.020861000  | 0.421507000  | -2.798516000 |
| H | -5.291319000  | -0.363179000 | -2.593374000 |
| F | 1.785216000   | -1.882689000 | -3.389743000 |
| F | 2.866767000   | 3.493558000  | -3.689614000 |
| F | 0.286109000   | 4.013880000  | -3.571745000 |
| F | -0.758269000  | -1.363566000 | -3.185059000 |
| F | 4.307179000   | -0.987652000 | -3.704766000 |
| F | -2.741225000  | 0.434139000  | -3.063382000 |
| F | 4.837467000   | 1.679458000  | -3.817534000 |
| F | -2.235092000  | 3.101463000  | -3.267033000 |
| C | 1.179139000   | 1.775810000  | -3.520831000 |
| C | 0.904275000   | 0.358314000  | -3.422592000 |
| C | -1.210956000  | 2.232294000  | -3.317451000 |
| C | -0.440652000  | -0.054052000 | -3.268034000 |
| C | 3.286960000   | -0.111708000 | -3.633377000 |
| C | 1.988404000   | -0.551417000 | -3.486035000 |
| C | -1.473759000  | 0.855155000  | -3.210802000 |
| C | 2.529705000   | 2.181267000  | -3.652467000 |
| C | 0.089200000   | 2.678985000  | -3.468492000 |
| C | 3.557107000   | 1.265826000  | -3.710959000 |
| N | 0.100351000   | 5.120812000  | 2.299679000  |
| N | -0.437338000  | 6.347348000  | 2.432551000  |
| O | -2.231946000  | 4.109540000  | 2.906457000  |
| H | -1.261746000  | 4.114537000  | 2.663210000  |
| N | 0.410323000   | 7.376447000  | 2.432169000  |
| C | -2.384953000  | 7.800490000  | 2.448978000  |
| H | -1.700319000  | 8.623580000  | 2.259238000  |
| C | 1.429435000   | 5.366386000  | 2.199996000  |
| C | -4.354342000  | 9.390474000  | 2.402853000  |

|   |               |              |              |
|---|---------------|--------------|--------------|
| H | -3.879538000  | 9.933719000  | 1.573244000  |
| H | -5.433705000  | 9.320553000  | 2.202784000  |
| H | -4.208879000  | 9.995171000  | 3.312590000  |
| C | 3.973804000   | 6.455988000  | 2.073252000  |
| H | 4.992917000   | 6.841475000  | 2.022168000  |
| C | 3.771928000   | 5.049355000  | 1.961904000  |
| H | 4.640931000   | 4.408993000  | 1.809640000  |
| C | 2.508857000   | 4.480894000  | 2.018044000  |
| H | 2.338813000   | 3.413105000  | 1.905913000  |
| C | 1.621703000   | 6.778622000  | 2.285883000  |
| C | -2.673931000  | 5.391396000  | 2.812733000  |
| C | -1.841040000  | 6.512595000  | 2.568485000  |
| C | -3.758458000  | 8.017756000  | 2.569370000  |
| C | 2.916096000   | 7.340341000  | 2.225936000  |
| H | 3.068227000   | 8.417410000  | 2.297068000  |
| C | -4.048836000  | 5.627041000  | 2.975301000  |
| H | -4.688637000  | 4.772384000  | 3.197267000  |
| F | -11.283186000 | -3.584704000 | 0.110869000  |
| F | -12.912897000 | 1.653036000  | -0.155839000 |
| F | -10.396583000 | 2.433743000  | -0.100316000 |
| F | -8.801600000  | -2.808869000 | 0.254086000  |
| F | -13.890152000 | -2.951685000 | -0.141418000 |
| F | -7.008789000  | -0.818306000 | 0.329546000  |
| F | -14.692028000 | -0.352631000 | -0.237891000 |
| F | -7.788856000  | 1.783344000  | 0.141659000  |
| C | -11.056413000 | 0.116343000  | -0.030407000 |
| C | -10.635236000 | -1.265596000 | 0.059317000  |
| C | -8.721022000  | 0.814234000  | 0.115169000  |
| C | -9.252925000  | -1.538636000 | 0.180541000  |
| C | -12.962059000 | -1.976210000 | -0.093861000 |
| C | -11.623250000 | -2.281184000 | 0.021221000  |
| N | -9.925321000  | -2.564471000 | 3.307234000  |
| C | -8.315752000  | -0.528796000 | 0.213654000  |
| N | -9.511354000  | -1.288942000 | 3.427539000  |
| O | -7.487118000  | -3.331985000 | 3.854932000  |
| H | -8.459317000  | -3.426633000 | 3.634828000  |
| C | -12.444071000 | 0.381914000  | -0.128549000 |
| N | -10.460215000 | -0.351619000 | 3.449132000  |
| C | -10.062225000 | 1.125988000  | -0.003561000 |
| C | -7.722122000  | 0.355103000  | 3.398256000  |
| H | -8.492480000  | 1.103862000  | 3.226314000  |
| C | -13.372971000 | -0.633469000 | -0.163112000 |
| C | -11.274544000 | -2.455724000 | 3.240320000  |
| C | -5.926659000  | 2.136492000  | 3.305704000  |

|   |               |              |              |
|---|---------------|--------------|--------------|
| H | -6.475442000  | 2.627446000  | 2.488615000  |
| H | -4.851036000  | 2.177590000  | 3.079651000  |
| H | -6.111740000  | 2.724303000  | 4.219484000  |
| C | -13.919010000 | -1.631749000 | 3.175735000  |
| H | -14.973081000 | -1.351246000 | 3.150386000  |
| C | -13.576638000 | -3.010578000 | 3.057719000  |
| H | -14.380327000 | -3.736391000 | 2.925926000  |
| C | -12.262244000 | -3.447373000 | 3.082370000  |
| H | -11.985992000 | -4.492282000 | 2.964822000  |
| C | -11.607510000 | -1.071246000 | 3.332247000  |
| C | -5.442796000  | -0.310595000 | 3.744169000  |
| H | -4.387357000  | -0.053836000 | 3.832938000  |
| C | -7.180274000  | -2.012492000 | 3.751528000  |
| C | -8.128898000  | -0.981360000 | 3.529380000  |
| C | -6.376332000  | 0.710360000  | 3.485010000  |
| C | -12.953550000 | -0.643112000 | 3.304047000  |
| H | -13.211853000 | 0.412990000  | 3.380200000  |
| C | -5.833931000  | -1.638116000 | 3.881642000  |
| H | -5.104420000  | -2.422425000 | 4.085858000  |
| F | 9.140750000   | 6.688746000  | -0.304482000 |
| F | 8.059211000   | 1.311948000  | -0.005913000 |
| F | 10.639857000  | 0.792176000  | -0.122480000 |
| F | 11.684278000  | 6.168698000  | -0.509543000 |
| F | 6.618799000   | 5.793158000  | 0.009238000  |
| F | 13.667234000  | 4.370992000  | -0.631219000 |
| F | 6.088473000   | 3.126974000  | 0.122381000  |
| F | 13.161058000  | 1.704594000  | -0.427192000 |
| C | 9.746840000   | 3.029697000  | -0.174696000 |
| C | 10.021734000  | 4.446818000  | -0.272009000 |
| C | 12.136965000  | 2.572838000  | -0.377151000 |
| C | 11.366661000  | 4.859183000  | -0.426568000 |
| C | 7.639049000   | 4.916839000  | -0.061222000 |
| C | 8.937563000   | 5.357474000  | -0.208189000 |
| N | 10.704014000  | 3.748948000  | 3.144939000  |
| C | 12.399737000  | 3.950351000  | -0.484726000 |
| N | 11.241735000  | 2.522037000  | 3.012993000  |
| O | 13.036234000  | 4.760167000  | 2.538889000  |
| H | 12.066154000  | 4.754662000  | 2.782375000  |
| C | 8.396304000   | 2.623865000  | -0.042133000 |
| N | 10.394073000  | 1.492936000  | 3.013375000  |
| C | 10.836778000  | 2.126522000  | -0.227036000 |
| C | 13.189350000  | 1.068893000  | 2.996567000  |
| H | 12.504716000  | 0.245805000  | 3.186306000  |
| C | 7.368870000   | 3.539682000  | 0.015433000  |

|   |               |              |             |
|---|---------------|--------------|-------------|
| C | 9.374930000   | 3.503375000  | 3.244614000 |
| C | 15.158739000  | -0.521089000 | 3.042691000 |
| H | 14.683934000  | -1.064335000 | 3.872301000 |
| H | 16.238103000  | -0.451170000 | 3.242761000 |
| H | 15.013276000  | -1.125787000 | 2.132954000 |
| C | 6.830562000   | 2.413772000  | 3.371366000 |
| H | 5.811449000   | 2.028286000  | 3.422450000 |
| C | 7.032470000   | 3.820029000  | 3.483651000 |
| H | 6.163465000   | 4.460390000  | 3.635904000 |
| C | 8.295522000   | 4.388496000  | 3.427472000 |
| H | 8.465655000   | 5.456210000  | 3.539560000 |
| C | 9.182663000   | 2.091138000  | 3.158735000 |
| C | 15.379904000  | 1.962015000  | 2.595602000 |
| H | 16.453487000  | 1.814948000  | 2.481167000 |
| C | 13.478400000  | 3.478009000  | 2.632755000 |
| C | 12.645480000  | 2.355865000  | 2.876695000 |
| C | 14.562823000  | 0.852004000  | 2.875248000 |
| C | 7.888270000   | 1.529418000  | 3.218682000 |
| H | 7.736170000   | 0.451973000  | 3.148476000 |
| C | 14.853305000  | 3.242652000  | 2.469355000 |
| H | 15.492905000  | 4.096905000  | 2.248392000 |
| F | 1.972116000   | -3.941935000 | 3.289489000 |
| F | 3.053674000   | 1.434314000  | 2.989616000 |
| F | 0.473009000   | 1.954634000  | 3.107486000 |
| F | -0.571369000  | -3.422814000 | 3.494173000 |
| F | 4.494079000   | -3.046898000 | 2.974465000 |
| F | -2.554325000  | -1.625108000 | 3.615849000 |
| F | 5.024397000   | -0.380164000 | 2.862623000 |
| F | -2.048192000  | 1.042217000  | 3.412199000 |
| C | 1.366038000   | -0.283437000 | 3.158400000 |
| C | 1.091175000   | -1.700933000 | 3.256639000 |
| C | -1.024057000  | 0.173047000  | 3.361781000 |
| C | -0.253752000  | -2.113299000 | 3.411198000 |
| C | 3.473860000   | -2.170955000 | 3.045854000 |
| C | 2.175303000   | -2.610664000 | 3.193196000 |
| C | -1.286828000  | -1.204467000 | 3.469356000 |
| C | 2.716603000   | 0.122021000  | 3.026767000 |
| C | 0.276100000   | 0.619739000  | 3.210740000 |
| C | 3.744007000   | -0.793421000 | 2.968272000 |
| N | -9.645422000  | -8.634981000 | 0.836573000 |
| N | -9.231455000  | -7.359452000 | 0.956879000 |
| O | -7.207219000  | -9.402495000 | 1.384272000 |
| H | -8.179461000  | -9.496217000 | 1.164544000 |
| N | -10.180316000 | -6.422130000 | 0.978472000 |

|   |               |               |              |
|---|---------------|---------------|--------------|
| C | -7.442221000  | -5.715406000  | 0.927596000  |
| H | -8.212581000  | -4.966648000  | 0.755654000  |
| C | -10.994645000 | -8.526234000  | 0.769660000  |
| C | -5.646806000  | -3.933091000  | 0.835405000  |
| H | -6.195586000  | -3.442153000  | 0.018324000  |
| H | -4.571138000  | -3.892861000  | 0.608990000  |
| H | -5.831885000  | -3.345270000  | 1.749194000  |
| C | -13.639153000 | -7.701334000  | 0.705451000  |
| H | -14.693182000 | -7.421757000  | 0.679726000  |
| C | -13.296781000 | -9.080163000  | 0.587435000  |
| H | -14.100469000 | -9.805976000  | 0.455642000  |
| C | -11.982387000 | -9.516957000  | 0.612087000  |
| H | -11.706135000 | -10.561867000 | 0.494539000  |
| C | -11.327654000 | -7.140831000  | 0.861964000  |
| C | -5.162939000  | -6.380180000  | 1.273885000  |
| H | -4.107458000  | -6.124346000  | 1.362278000  |
| C | -6.900418000  | -8.082077000  | 1.281244000  |
| C | -7.848999000  | -7.051871000  | 1.058719000  |
| C | -6.096472000  | -5.359224000  | 1.014745000  |
| C | -12.673651000 | -6.713622000  | 0.833387000  |
| H | -12.931954000 | -5.657521000  | 0.909540000  |
| C | -5.554074000  | -7.707700000  | 1.411358000  |
| H | -4.824562000  | -8.492010000  | 1.615574000  |
| F | 9.420649000   | 0.618235000   | -2.775142000 |
| F | 8.339067000   | -4.757637000  | -2.476197000 |
| F | 10.919756000  | -5.278334000  | -2.593140000 |
| F | 11.964135000  | 0.099114000   | -2.979826000 |
| F | 6.898656000   | -0.276426000  | -2.461045000 |
| F | 13.947091000  | -1.698592000  | -3.101502000 |
| F | 6.368483000   | -2.943477000  | -2.348105000 |
| F | 13.440958000  | -4.365917000  | -2.897852000 |
| C | 10.026697000  | -3.039888000  | -2.644980000 |
| C | 10.301591000  | -1.622766000  | -2.742292000 |
| C | 12.416822000  | -3.496747000  | -2.847434000 |
| C | 11.646517000  | -1.210401000  | -2.896851000 |
| C | 7.918906000   | -1.152745000  | -2.531510000 |
| C | 9.217462000   | -0.713037000  | -2.678849000 |
| N | 10.983914000  | -2.321562000  | 0.674279000  |
| C | 12.679595000  | -2.119233000  | -2.955009000 |
| N | 11.521635000  | -3.548473000  | 0.542333000  |
| O | 13.316133000  | -1.310344000  | 0.068229000  |
| H | 12.346010000  | -1.314923000  | 0.312091000  |
| C | 8.676158000   | -3.445721000  | -2.512443000 |
| N | 10.673973000  | -4.577574000  | 0.542715000  |



|   |              |               |              |
|---|--------------|---------------|--------------|
| C | 11.116635000 | -3.943063000  | -2.697320000 |
| C | 13.469249000 | -5.001617000  | 0.525906000  |
| H | 12.784615000 | -5.824705000  | 0.715646000  |
| C | 7.648692000  | -2.529810000  | -2.454912000 |
| C | 9.654830000  | -2.567135000  | 0.773954000  |
| C | 15.438596000 | -6.590674000  | 0.572408000  |
| H | 14.963791000 | -7.133920000  | 1.402017000  |
| H | 16.518002000 | -6.521680000  | 0.772101000  |
| H | 15.293133000 | -7.195371000  | -0.337330000 |
| C | 7.110425000  | -3.655818000  | 0.901135000  |
| H | 6.091349000  | -4.042225000  | 0.951790000  |
| C | 7.312286000  | -2.249620000  | 1.013402000  |
| H | 6.443243000  | -1.609271000  | 1.165555000  |
| C | 8.575375000  | -1.681085000  | 0.957149000  |
| H | 8.745512000  | -0.613375000  | 1.069277000  |
| C | 9.462520000  | -3.978446000  | 0.688452000  |
| C | 15.659762000 | -4.107570000  | 0.125319000  |
| H | 16.733388000 | -4.255562000  | 0.010507000  |
| C | 13.758257000 | -2.591576000  | 0.162472000  |
| C | 12.925337000 | -3.713720000  | 0.406412000  |
| C | 14.842681000 | -5.217580000  | 0.404965000  |
| C | 8.168169000  | -4.541092000  | 0.748022000  |
| H | 8.016070000  | -5.618537000  | 0.677816000  |
| C | 15.133161000 | -2.826933000  | -0.000929000 |
| H | 15.772763000 | -1.972681000  | -0.221891000 |
| F | 2.252016000  | -10.012446000 | 0.818829000  |
| F | 3.333496000  | -4.635230000  | 0.519327000  |
| F | 0.752908000  | -4.115876000  | 0.636826000  |
| F | -0.291513000 | -9.492398000  | 1.023889000  |
| F | 4.773936000  | -9.116483000  | 0.504182000  |
| F | -2.274468000 | -7.694692000  | 1.145565000  |
| F | 5.304296000  | -6.450674000  | 0.391963000  |
| F | -1.768293000 | -5.028294000  | 0.941538000  |
| C | 1.645897000  | -6.353021000  | 0.688137000  |
| C | 1.371032000  | -7.770518000  | 0.786355000  |
| C | -0.744200000 | -5.896538000  | 0.891497000  |
| C | 0.026105000  | -8.182883000  | 0.940914000  |
| C | 3.753716000  | -8.240539000  | 0.575570000  |
| C | 2.455203000  | -8.681174000  | 0.722536000  |
| N | 0.688721000  | -7.072273000  | -2.631519000 |
| C | -1.006972000 | -7.274051000  | 0.999072000  |
| N | 0.151030000  | -5.845737000  | -2.498647000 |
| O | -1.643469000 | -8.083867000  | -2.024543000 |
| H | -0.673389000 | -8.078362000  | -2.268028000 |

|   |              |              |              |
|---|--------------|--------------|--------------|
| C | 2.996482000  | -5.947571000 | 0.556451000  |
| N | 0.998692000  | -4.816636000 | -2.499028000 |
| C | 0.555957000  | -5.449846000 | 0.740456000  |
| C | -1.796584000 | -4.392594000 | -2.482220000 |
| H | -1.111950000 | -3.569504000 | -2.671960000 |
| C | 4.023863000  | -6.863006000 | 0.497963000  |
| C | 2.017805000  | -6.826699000 | -2.731194000 |
| C | -3.765956000 | -2.802597000 | -2.528356000 |
| H | -3.291156000 | -2.259372000 | -3.357951000 |
| H | -4.845336000 | -2.872507000 | -2.728430000 |
| H | -3.620524000 | -2.197933000 | -1.618491000 |
| C | 4.562172000  | -5.737095000 | -2.857949000 |
| H | 5.581286000  | -5.351611000 | -2.909027000 |
| C | 4.360295000  | -7.143729000 | -2.969304000 |
| H | 5.229300000  | -7.784090000 | -3.121558000 |
| C | 3.097243000  | -7.712196000 | -2.913126000 |
| H | 2.927110000  | -8.779910000 | -3.025214000 |
| C | 2.210072000  | -5.414463000 | -2.645314000 |
| C | -3.987139000 | -5.285715000 | -2.081256000 |
| H | -5.060753000 | -5.138272000 | -1.967747000 |
| C | -2.085635000 | -6.801709000 | -2.118409000 |
| C | -1.252673000 | -5.680490000 | -2.362725000 |
| C | -3.170088000 | -4.175329000 | -2.361828000 |
| C | 3.504462000  | -4.852742000 | -2.705267000 |
| H | 3.656598000  | -3.775672000 | -2.634115000 |
| C | -3.460570000 | -6.565977000 | -1.955935000 |
| H | -4.100140000 | -7.420605000 | -1.734046000 |
| C | -4.595197000 | 6.908770000  | 2.742639000  |
| H | -5.657034000 | 7.033079000  | 2.698533000  |

S<sub>1</sub> (enol)

|   |              |              |              |
|---|--------------|--------------|--------------|
| N | 0.576521000  | -0.955751000 | -0.116261000 |
| N | 0.016170000  | 0.295024000  | 0.038891000  |
| O | -1.704329000 | -1.907415000 | 0.484249000  |
| H | -0.707888000 | -1.899402000 | 0.253926000  |
| N | 0.889807000  | 1.344776000  | -0.011691000 |
| C | -1.915966000 | 1.731253000  | 0.049177000  |
| H | -1.268571000 | 2.588598000  | -0.073455000 |
| C | 1.890462000  | -0.689762000 | -0.241405000 |
| C | -3.901176000 | 3.246620000  | -0.035642000 |
| H | -3.429856000 | 3.804933000  | -0.848537000 |
| H | -4.981113000 | 3.205321000  | -0.195965000 |
| H | -3.699378000 | 3.800769000  | 0.883571000  |
| C | 4.421919000  | 0.418155000  | -0.520785000 |

|   |               |              |              |
|---|---------------|--------------|--------------|
| H | 5.425749000   | 0.811102000  | -0.636543000 |
| C | 4.222145000   | -0.982967000 | -0.611186000 |
| H | 5.063975000   | -1.612897000 | -0.868642000 |
| C | 2.970710000   | -1.560436000 | -0.448323000 |
| H | 2.813975000   | -2.631336000 | -0.469534000 |
| C | 2.078003000   | 0.734726000  | -0.182146000 |
| C | -4.136287000  | 0.751625000  | 0.295828000  |
| H | -5.211840000  | 0.871089000  | 0.332446000  |
| C | -2.195156000  | -0.692090000 | 0.341264000  |
| C | -1.335942000  | 0.463198000  | 0.130463000  |
| C | -3.304177000  | 1.882355000  | 0.092896000  |
| C | 3.369010000   | 1.293058000  | -0.304114000 |
| H | 3.512090000   | 2.368579000  | -0.282628000 |
| C | -3.584005000  | -0.504693000 | 0.441284000  |
| H | -4.204398000  | -1.371448000 | 0.631263000  |
| N | -10.392630000 | 5.563370000  | -0.902514000 |
| N | -9.978687000  | 6.838542000  | -0.781283000 |
| O | -7.954361000  | 4.795577000  | -0.353888000 |
| H | -8.926601000  | 4.701821000  | -0.573617000 |
| N | -10.927619000 | 7.776200000  | -0.760616000 |
| C | -8.189524000  | 8.482664000  | -0.810566000 |
| H | -8.959917000  | 9.231389000  | -0.982508000 |
| C | -11.741856000 | 5.672060000  | -0.969428000 |
| C | -6.394181000  | 10.265055000 | -0.902742000 |
| H | -6.942986000  | 10.755985000 | -1.719830000 |
| H | -5.318518000  | 10.305274000 | -1.129171000 |
| H | -6.579288000  | 10.852858000 | 0.011039000  |
| C | -14.386370000 | 6.496470000  | -1.032711000 |
| H | -15.440411000 | 6.776002000  | -1.058435000 |
| C | -14.043939000 | 5.117656000  | -1.150726000 |
| H | -14.847597000 | 4.391807000  | -1.282519000 |
| C | -12.729526000 | 4.680917000  | -1.126075000 |
| H | -12.453229000 | 3.636020000  | -1.243623000 |
| C | -12.074925000 | 7.057448000  | -0.877124000 |
| C | -5.910217000  | 7.817992000  | -0.464248000 |
| H | -4.854773000  | 8.074244000  | -0.376810000 |
| C | -7.647616000  | 6.116015000  | -0.456933000 |
| C | -8.596244000  | 7.146183000  | -0.679442000 |
| C | -6.843793000  | 8.838903000  | -0.723435000 |
| C | -13.420909000 | 7.484223000  | -0.904774000 |
| H | -13.679290000 | 8.540689000  | -0.829548000 |
| C | -6.301377000  | 6.490782000  | -0.327705000 |
| H | -5.571638000  | 5.706271000  | -0.122660000 |
| F | 1.504898000   | 4.186042000  | -0.919333000 |

|   |               |              |              |
|---|---------------|--------------|--------------|
| F | 2.586174000   | 9.563261000  | -1.218828000 |
| F | 0.005537000   | 10.082547000 | -1.101335000 |
| F | -1.038616000  | 4.705947000  | -0.714132000 |
| F | 4.026779000   | 5.082113000  | -1.233980000 |
| F | -3.021686000  | 6.503600000  | -0.592596000 |
| F | 4.556995000   | 7.748320000  | -1.347125000 |
| F | -2.515625000  | 9.170021000  | -0.796623000 |
| C | 0.898620000   | 7.845441000  | -1.050045000 |
| C | 0.623815000   | 6.427923000  | -0.951851000 |
| C | -1.491495000  | 8.301821000  | -0.846664000 |
| C | -0.721136000  | 6.015516000  | -0.797268000 |
| C | 3.006523000   | 5.958012000  | -1.162591000 |
| C | 1.708027000   | 5.517323000  | -1.015626000 |
| C | -1.754234000  | 6.924675000  | -0.739997000 |
| C | 2.249170000   | 8.250955000  | -1.181681000 |
| C | -0.191357000  | 8.748569000  | -0.997705000 |
| C | 3.276611000   | 7.335558000  | -1.240173000 |
| N | -10.112511000 | -0.506202000 | -3.372798000 |
| N | -9.698569000  | 0.768968000  | -3.251567000 |
| O | -7.674245000  | -1.273988000 | -2.824174000 |
| H | -8.646440000  | -1.368678000 | -3.044277000 |
| N | -10.647501000 | 1.706627000  | -3.230900000 |
| C | -7.909406000  | 2.413091000  | -3.280849000 |
| H | -8.679798000  | 3.161816000  | -3.452792000 |
| C | -11.461739000 | -0.397513000 | -3.439711000 |
| C | -6.113997000  | 4.194606000  | -3.373428000 |
| H | -6.662825000  | 4.685487000  | -4.190490000 |
| H | -5.038400000  | 4.235702000  | -3.599455000 |
| H | -6.299147000  | 4.782300000  | -2.459590000 |
| C | -14.106209000 | 0.425972000  | -3.503371000 |
| H | -15.160293000 | 0.706429000  | -3.528719000 |
| C | -13.763778000 | -0.952842000 | -3.621386000 |
| H | -14.567435000 | -1.678691000 | -3.753179000 |
| C | -12.449364000 | -1.389581000 | -3.596735000 |
| H | -12.173068000 | -2.434478000 | -3.714283000 |
| C | -11.794765000 | 0.986950000  | -3.347785000 |
| C | -5.630052000  | 1.747491000  | -2.934936000 |
| H | -4.574656000  | 2.004671000  | -2.847094000 |
| C | -7.367457000  | 0.045519000  | -2.927578000 |
| C | -8.316127000  | 1.076609000  | -3.149726000 |
| C | -6.563633000  | 2.768406000  | -3.194095000 |
| C | -13.140792000 | 1.414650000  | -3.375058000 |
| H | -13.399172000 | 2.471117000  | -3.299832000 |
| C | -6.021160000  | 0.420329000  | -2.798390000 |

|   |              |              |              |
|---|--------------|--------------|--------------|
| H | -5.291584000 | -0.364325000 | -2.593248000 |
| F | 1.785015000  | -1.883531000 | -3.389617000 |
| F | 2.866335000  | 3.492763000  | -3.689488000 |
| F | 0.285654000  | 4.012974000  | -3.571619000 |
| F | -0.758491000 | -1.364518000 | -3.184933000 |
| F | 4.306940000  | -0.988385000 | -3.704640000 |
| F | -2.741526000 | 0.433102000  | -3.063256000 |
| F | 4.837113000  | 1.678747000  | -3.817408000 |
| F | -2.235507000 | 3.100448000  | -3.266907000 |
| C | 1.178781000  | 1.774942000  | -3.520705000 |
| C | 0.903978000  | 0.357434000  | -3.422466000 |
| C | -1.211333000 | 2.231323000  | -3.317325000 |
| C | -0.440931000 | -0.054990000 | -3.267908000 |
| C | 3.286683000  | -0.112486000 | -3.633251000 |
| C | 1.988146000  | -0.552251000 | -3.485909000 |
| C | -1.474077000 | 0.854173000  | -3.210676000 |
| C | 2.529330000  | 2.180457000  | -3.652341000 |
| C | 0.088803000  | 2.678071000  | -3.468366000 |
| C | 3.556771000  | 1.265060000  | -3.710833000 |
| N | 0.099850000  | 5.119897000  | 2.299805000  |
| N | -0.437893000 | 6.346410000  | 2.432677000  |
| O | -2.232401000 | 4.108506000  | 2.906595000  |
| H | -1.262205000 | 4.113574000  | 2.663334000  |
| N | 0.409724000  | 7.375546000  | 2.432295000  |
| C | -2.385571000 | 7.799469000  | 2.449104000  |
| H | -1.700972000 | 8.622588000  | 2.259364000  |
| C | 1.428923000  | 5.365528000  | 2.200122000  |
| C | -4.355028000 | 9.389367000  | 2.402979000  |
| H | -3.880246000 | 9.932633000  | 1.573370000  |
| H | -5.434387000 | 9.319400000  | 2.202910000  |
| H | -4.209591000 | 9.994071000  | 3.312716000  |
| C | 3.973245000  | 6.455240000  | 2.073378000  |
| H | 4.992341000  | 6.840770000  | 2.022294000  |
| C | 3.771430000  | 5.048598000  | 1.962030000  |
| H | 4.640460000  | 4.408274000  | 1.809766000  |
| C | 2.508384000  | 4.480083000  | 2.018171000  |
| H | 2.338383000  | 3.412287000  | 1.906040000  |
| C | 1.621130000  | 6.777773000  | 2.286009000  |
| C | -2.674448000 | 5.390362000  | 2.812862000  |
| C | -1.841602000 | 6.511597000  | 2.568610000  |
| C | -3.759085000 | 8.016675000  | 2.569496000  |
| C | 2.915499000  | 7.339548000  | 2.226062000  |
| H | 3.067584000  | 8.416624000  | 2.297194000  |
| C | -4.049365000 | 5.625951000  | 2.975425000  |

|   |               |              |              |
|---|---------------|--------------|--------------|
| H | -4.689115000  | 4.771268000  | 3.197385000  |
| F | -11.283314000 | -3.586108000 | 0.110995000  |
| F | -12.913250000 | 1.651561000  | -0.155713000 |
| F | -10.396970000 | 2.432377000  | -0.100190000 |
| F | -8.801761000  | -2.810167000 | 0.254212000  |
| F | -13.890307000 | -2.953201000 | -0.141292000 |
| F | -7.009034000  | -0.819525000 | 0.329673000  |
| F | -14.692295000 | -0.354182000 | -0.237765000 |
| F | -7.789214000  | 1.782090000  | 0.141785000  |
| C | -11.056699000 | 0.114948000  | -0.030281000 |
| C | -10.635463000 | -1.266973000 | 0.059443000  |
| C | -8.721339000  | 0.812939000  | 0.115296000  |
| C | -9.253140000  | -1.539953000 | 0.180666000  |
| C | -12.962255000 | -1.977687000 | -0.093735000 |
| C | -11.623433000 | -2.282603000 | 0.021347000  |
| N | -9.925492000  | -2.565817000 | 3.307360000  |
| C | -8.316011000  | -0.530073000 | 0.213781000  |
| N | -9.511579000  | -1.290270000 | 3.427665000  |
| O | -7.487257000  | -3.333226000 | 3.855058000  |
| H | -8.459451000  | -3.427916000 | 3.634954000  |
| C | -12.444368000 | 0.380459000  | -0.128423000 |
| N | -10.460482000 | -0.352989000 | 3.449258000  |
| C | -10.062555000 | 1.124636000  | -0.003435000 |
| C | -7.722418000  | 0.353852000  | 3.398382000  |
| H | -8.492810000  | 1.102578000  | 3.226440000  |
| C | -13.373226000 | -0.634963000 | -0.162986000 |
| C | -11.274719000 | -2.457128000 | 3.240446000  |
| C | -5.927032000  | 2.135318000  | 3.305830000  |
| H | -6.475837000  | 2.626248000  | 2.488741000  |
| H | -4.851412000  | 2.176462000  | 3.079777000  |
| H | -6.112139000  | 2.723122000  | 4.219610000  |
| C | -13.919221000 | -1.633267000 | 3.175861000  |
| H | -14.973305000 | -1.352810000 | 3.150512000  |
| C | -13.576790000 | -3.012080000 | 3.057845000  |
| H | -14.380447000 | -3.737929000 | 2.926052000  |
| C | -12.262377000 | -3.448819000 | 3.082496000  |
| H | -11.986080000 | -4.493717000 | 2.964948000  |
| C | -11.607746000 | -1.072665000 | 3.332373000  |
| C | -5.443064000  | -0.311747000 | 3.744295000  |
| H | -4.387636000  | -0.054944000 | 3.833064000  |
| C | -7.180469000  | -2.013719000 | 3.751654000  |
| C | -8.129137000  | -0.982629000 | 3.529506000  |
| C | -6.376644000  | 0.709167000  | 3.485136000  |
| C | -12.953803000 | -0.644588000 | 3.304173000  |

|   |               |              |              |
|---|---------------|--------------|--------------|
| H | -13.212153000 | 0.411502000  | 3.380326000  |
| C | -5.834142000  | -1.639286000 | 3.881768000  |
| H | -5.104597000  | -2.423564000 | 4.085984000  |
| F | 9.140180000   | 6.688220000  | -0.304356000 |
| F | 8.058874000   | 1.311376000  | -0.005787000 |
| F | 10.639541000  | 0.791715000  | -0.122354000 |
| F | 11.683731000  | 6.168282000  | -0.509417000 |
| F | 6.618268000   | 5.792525000  | 0.009364000  |
| F | 13.666764000  | 4.370661000  | -0.631093000 |
| F | 6.088057000   | 3.126317000  | 0.122507000  |
| F | 13.160703000  | 1.704241000  | -0.427066000 |
| C | 9.746428000   | 3.029198000  | -0.174570000 |
| C | 10.021261000  | 4.446330000  | -0.271883000 |
| C | 12.136573000  | 2.572441000  | -0.377025000 |
| C | 11.366171000  | 4.858753000  | -0.426442000 |
| C | 7.638556000   | 4.916249000  | -0.061096000 |
| C | 8.937051000   | 5.356940000  | -0.208063000 |
| N | 10.703571000  | 3.748489000  | 3.145065000  |
| C | 12.399286000  | 3.949966000  | -0.484600000 |
| N | 11.241345000  | 2.521601000  | 3.013119000  |
| O | 13.035748000  | 4.759809000  | 2.539015000  |
| H | 12.065668000  | 4.754262000  | 2.782501000  |
| C | 8.395909000   | 2.623307000  | -0.042007000 |
| N | 10.393728000  | 1.492465000  | 3.013501000  |
| C | 10.836404000  | 2.126069000  | -0.226910000 |
| C | 13.189023000  | 1.068542000  | 2.996693000  |
| H | 12.504424000  | 0.245424000  | 3.186432000  |
| C | 7.368436000   | 3.539081000  | 0.015559000  |
| C | 9.374498000   | 3.502860000  | 3.244740000  |
| C | 15.158480000  | -0.521355000 | 3.042817000  |
| H | 14.683698000  | -1.064622000 | 3.872427000  |
| H | 16.237840000  | -0.451390000 | 3.242887000  |
| H | 15.013043000  | -1.126060000 | 2.133080000  |
| C | 6.830177000   | 2.413146000  | 3.371492000  |
| H | 5.811080000   | 2.027617000  | 3.422576000  |
| C | 7.032024000   | 3.819412000  | 3.483777000  |
| H | 6.162991000   | 4.459735000  | 3.636030000  |
| C | 8.295052000   | 4.387934000  | 3.427598000  |
| H | 8.465139000   | 5.455655000  | 3.539686000  |
| C | 9.182292000   | 2.090614000  | 3.158861000  |
| C | 15.379538000  | 1.961758000  | 2.595728000  |
| H | 16.453127000  | 1.814737000  | 2.481293000  |
| C | 13.477969000  | 3.477670000  | 2.632881000  |
| C | 12.645097000  | 2.355490000  | 2.876821000  |

|   |               |               |             |
|---|---------------|---------------|-------------|
| C | 14.562505000  | 0.851712000   | 2.875374000 |
| C | 7.887922000   | 1.528839000   | 3.218808000 |
| H | 7.735870000   | 0.451387000   | 3.148602000 |
| C | 14.852884000  | 3.242373000   | 2.469481000 |
| H | 15.492448000  | 4.096653000   | 2.248518000 |
| F | 1.972005000   | -3.942769000  | 3.289615000 |
| F | 3.053330000   | 1.433526000   | 2.989742000 |
| F | 0.472644000   | 1.953736000   | 3.107612000 |
| F | -0.571503000  | -3.423757000  | 3.494299000 |
| F | 4.493929000   | -3.047624000  | 2.974591000 |
| F | -2.554537000  | -1.626137000  | 3.615975000 |
| F | 5.024131000   | -0.380866000  | 2.862749000 |
| F | -2.048518000  | 1.041209000   | 3.412325000 |
| C | 1.365768000   | -0.284297000  | 3.158526000 |
| C | 1.090966000   | -1.701805000  | 3.256765000 |
| C | -1.024346000  | 0.172084000   | 3.361907000 |
| C | -0.253943000  | -2.114229000  | 3.411324000 |
| C | 3.473672000   | -2.171724000  | 3.045980000 |
| C | 2.175134000   | -2.611489000  | 3.193322000 |
| C | -1.287058000  | -1.205441000  | 3.469482000 |
| C | 2.716316000   | 0.121220000   | 3.026893000 |
| C | 0.275792000   | 0.618832000   | 3.210866000 |
| C | 3.743760000   | -0.794179000  | 2.968398000 |
| N | -9.645332000  | -8.636315000  | 0.836699000 |
| N | -9.231420000  | -7.360768000  | 0.957005000 |
| O | -7.207096000  | -9.403724000  | 1.384398000 |
| H | -8.179333000  | -9.497488000  | 1.164670000 |
| N | -10.180321000 | -6.423487000  | 0.978598000 |
| C | -7.442257000  | -5.716645000  | 0.927722000 |
| H | -8.212649000  | -4.967920000  | 0.755780000 |
| C | -10.994559000 | -8.527626000  | 0.769786000 |
| C | -5.646918000  | -3.934254000  | 0.835535000 |
| H | -6.195720000  | -3.443339000  | 0.018450000 |
| H | -4.571252000  | -3.893977000  | 0.609117000 |
| H | -5.832022000  | -3.346440000  | 1.749319000 |
| C | -13.639104000 | -7.702840000  | 0.705577000 |
| H | -14.693144000 | -7.423308000  | 0.679852000 |
| C | -13.296672000 | -9.081654000  | 0.587561000 |
| H | -14.100328000 | -9.807501000  | 0.455768000 |
| C | -11.982258000 | -9.518391000  | 0.612213000 |
| H | -11.705962000 | -10.563290000 | 0.494665000 |
| C | -11.327628000 | -7.142238000  | 0.862090000 |
| C | -5.162946000  | -6.381320000  | 1.274011000 |
| H | -4.107476000  | -6.125442000  | 1.362404000 |



|   |               |              |              |
|---|---------------|--------------|--------------|
| C | -6.900352000  | -8.083292000 | 1.281370000  |
| C | -7.848977000  | -7.053127000 | 1.058845000  |
| C | -6.096523000  | -5.360406000 | 1.014870000  |
| C | -12.673643000 | -6.715086000 | 0.833513000  |
| H | -12.931992000 | -5.658996000 | 0.909666000  |
| C | -5.554023000  | -7.708858000 | 1.411484000  |
| H | -4.824478000  | -8.493136000 | 1.615700000  |
| F | 9.420341000   | 0.617722000  | -2.775016000 |
| F | 8.338991000   | -4.758197000 | -2.476071000 |
| F | 10.919702000  | -5.278783000 | -2.593014000 |
| F | 11.963849000  | 0.098710000  | -2.979700000 |
| F | 6.898386000   | -0.277048000 | -2.460919000 |
| F | 13.946882000  | -1.698911000 | -3.101376000 |
| F | 6.368328000   | -2.944122000 | -2.347979000 |
| F | 13.440865000  | -4.366257000 | -2.897726000 |
| C | 10.026546000  | -3.040376000 | -2.644854000 |
| C | 10.301379000  | -1.623242000 | -2.742166000 |
| C | 12.416691000  | -3.497132000 | -2.847308000 |
| C | 11.646288000  | -1.210820000 | -2.896725000 |
| C | 7.918674000   | -1.153323000 | -2.531384000 |
| C | 9.217211000   | -0.713558000 | -2.678723000 |
| N | 10.983732000  | -2.322008000 | 0.674405000  |
| C | 12.679404000  | -2.119606000 | -2.954883000 |
| N | 11.521506000  | -3.548897000 | 0.542459000  |
| O | 13.315908000  | -1.310690000 | 0.068355000  |
| H | 12.345786000  | -1.315310000 | 0.312217000  |
| C | 8.676025000   | -3.446266000 | -2.512317000 |
| N | 10.673888000  | -4.578033000 | 0.542841000  |
| C | 11.116523000  | -3.943504000 | -2.697194000 |
| C | 13.469183000  | -5.001956000 | 0.526032000  |
| H | 12.784585000  | -5.825074000 | 0.715772000  |
| C | 7.648520000   | -2.530400000 | -2.454786000 |
| C | 9.654658000   | -2.567638000 | 0.774080000  |
| C | 15.438599000  | -6.590929000 | 0.572534000  |
| H | 14.963816000  | -7.134195000 | 1.402143000  |
| H | 16.518001000  | -6.521888000 | 0.772227000  |
| H | 15.293161000  | -7.195633000 | -0.337204000 |
| C | 7.110301000   | -3.656431000 | 0.901261000  |
| H | 6.091242000   | -4.042882000 | 0.951916000  |
| C | 7.312102000   | -2.250224000 | 1.013528000  |
| H | 6.443031000   | -1.609913000 | 1.165682000  |
| C | 8.575166000   | -1.681634000 | 0.957276000  |
| H | 8.745257000   | -0.613918000 | 1.069403000  |
| C | 9.462409000   | -3.978958000 | 0.688578000  |

|   |              |               |              |
|---|--------------|---------------|--------------|
| C | 15.659657000 | -4.107815000  | 0.125445000  |
| H | 16.733289000 | -4.255761000  | 0.010633000  |
| C | 13.758086000 | -2.591902000  | 0.162598000  |
| C | 12.925215000 | -3.714083000  | 0.406538000  |
| C | 14.842623000 | -5.217861000  | 0.405091000  |
| C | 8.168083000  | -4.541659000  | 0.748148000  |
| H | 8.016030000  | -5.619111000  | 0.677942000  |
| C | 15.133001000 | -2.827200000  | -0.000803000 |
| H | 15.772566000 | -1.972921000  | -0.221765000 |
| F | 2.252164000  | -10.013268000 | 0.818955000  |
| F | 3.333414000  | -4.636006000  | 0.519455000  |
| F | 0.752804000  | -4.116762000  | 0.636952000  |
| F | -0.291385000 | -9.493329000  | 1.024015000  |
| F | 4.774047000  | -9.117197000  | 0.504308000  |
| F | -2.274419000 | -7.695709000  | 1.145691000  |
| F | 5.304292000  | -6.451365000  | 0.392089000  |
| F | -1.768358000 | -5.029289000  | 0.941664000  |
| C | 1.645889000  | -6.353869000  | 0.688263000  |
| C | 1.371084000  | -7.771378000  | 0.786481000  |
| C | -0.744227000 | -5.897489000  | 0.891623000  |
| C | 0.026176000  | -8.183801000  | 0.941040000  |
| C | 3.753789000  | -8.241297000  | 0.575696000  |
| C | 2.455296000  | -8.681987000  | 0.722662000  |
| N | 0.688744000  | -7.073162000  | -2.631393000 |
| C | -1.006940000 | -7.275013000  | 0.999198000  |
| N | 0.151001000  | -5.846650000  | -2.498521000 |
| O | -1.643402000 | -8.084856000  | -2.024417000 |
| H | -0.673323000 | -8.079309000  | -2.267902000 |
| C | 2.996457000  | -5.948361000  | 0.556576000  |
| N | 0.998618000  | -4.817512000  | -2.498902000 |
| C | 0.555910000  | -5.450742000  | 0.740582000  |
| C | -1.796676000 | -4.393589000  | -2.482094000 |
| H | -1.112078000 | -3.570471000  | -2.671834000 |
| C | 4.023876000  | -6.863752000  | 0.498089000  |
| C | 2.017817000  | -6.827531000  | -2.731068000 |
| C | -3.766114000 | -2.803681000  | -2.528229000 |
| H | -3.291339000 | -2.260433000  | -3.357824000 |
| H | -4.845493000 | -2.873634000  | -2.728304000 |
| H | -3.620715000 | -2.199004000  | -1.618372000 |
| C | 4.562138000  | -5.737818000  | -2.857822000 |
| H | 5.581235000  | -5.352289000  | -2.908901000 |
| C | 4.360321000  | -7.144460000  | -2.969178000 |
| H | 5.229354000  | -7.784784000  | -3.121432000 |
| C | 3.097294000  | -7.712981000  | -2.913000000 |

|   |              |              |              |
|---|--------------|--------------|--------------|
| H | 2.927207000  | -8.780703000 | -3.025088000 |
| C | 2.210024000  | -5.415287000 | -2.645188000 |
| C | -3.987193000 | -5.286806000 | -2.081130000 |
| H | -5.060813000 | -5.139408000 | -1.967621000 |
| C | -2.085624000 | -6.802717000 | -2.118283000 |
| C | -1.252710000 | -5.681463000 | -2.362599000 |
| C | -3.170190000 | -4.176385000 | -2.361701000 |
| C | 3.504390000  | -4.853510000 | -2.705140000 |
| H | 3.656477000  | -3.776434000 | -2.633990000 |
| C | -3.460568000 | -6.567044000 | -1.955809000 |
| H | -4.100102000 | -7.421700000 | -1.733920000 |
| C | -4.595776000 | 6.907653000  | 2.742766000  |
| H | -5.657618000 | 7.031917000  | 2.698659000  |

S<sub>1</sub> (keto)

|   |               |              |              |
|---|---------------|--------------|--------------|
| N | 0.579163000   | -0.945102000 | -0.303039000 |
| N | 0.063708000   | 0.244466000  | 0.166654000  |
| O | -1.587038000  | -1.771062000 | 0.891240000  |
| H | 0.029304000   | -1.767133000 | 0.036181000  |
| N | 0.957593000   | 1.232042000  | 0.163601000  |
| C | -1.888195000  | 1.679494000  | -0.118100000 |
| H | -1.236194000  | 2.520643000  | -0.319313000 |
| C | 1.932438000   | -0.755847000 | -0.335731000 |
| C | -3.852657000  | 3.253767000  | -0.199622000 |
| H | -3.431277000  | 3.756675000  | -1.073526000 |
| H | -4.942379000  | 3.243598000  | -0.276899000 |
| H | -3.566713000  | 3.844317000  | 0.674931000  |
| C | 4.467638000   | 0.324609000  | -0.482325000 |
| H | 5.476056000   | 0.714646000  | -0.566896000 |
| C | 4.250738000   | -1.063649000 | -0.670078000 |
| H | 5.087277000   | -1.692209000 | -0.941399000 |
| C | 2.986665000   | -1.630397000 | -0.583517000 |
| H | 2.818103000   | -2.695231000 | -0.673373000 |
| C | 2.133048000   | 0.633456000  | -0.113539000 |
| C | -4.110926000  | 0.776440000  | 0.227527000  |
| H | -5.188023000  | 0.892672000  | 0.263690000  |
| C | -2.155567000  | -0.677601000 | 0.515129000  |
| C | -1.354832000  | 0.455742000  | 0.154499000  |
| C | -3.301889000  | 1.869720000  | -0.051535000 |
| C | 3.430678000   | 1.188463000  | -0.193292000 |
| H | 3.589626000   | 2.254029000  | -0.070062000 |
| C | -3.553420000  | -0.476580000 | 0.500633000  |
| H | -4.186310000  | -1.307450000 | 0.789623000  |
| N | -10.396487000 | 5.563224000  | -0.903072000 |

|   |               |              |              |
|---|---------------|--------------|--------------|
| N | -9.982774000  | 6.838471000  | -0.781841000 |
| O | -7.958080000  | 4.795870000  | -0.354446000 |
| H | -8.930303000  | 4.701939000  | -0.574175000 |
| N | -10.931875000 | 7.775958000  | -0.761174000 |
| C | -8.193907000  | 8.482915000  | -0.811124000 |
| H | -8.964435000  | 9.231501000  | -0.983066000 |
| C | -11.745733000 | 5.671671000  | -0.969986000 |
| C | -6.398885000  | 10.265629000 | -0.903300000 |
| H | -6.947779000  | 10.756460000 | -1.720388000 |
| H | -5.323230000  | 10.306042000 | -1.129729000 |
| H | -6.584098000  | 10.853399000 | 0.010481000  |
| C | -14.390395000 | 6.495604000  | -1.033269000 |
| H | -15.444487000 | 6.774946000  | -1.058993000 |
| C | -14.047716000 | 5.116852000  | -1.151284000 |
| H | -14.851243000 | 4.390858000  | -1.283077000 |
| C | -12.733224000 | 4.680350000  | -1.126633000 |
| H | -12.456739000 | 3.635503000  | -1.244181000 |
| C | -12.079051000 | 7.056999000  | -0.877682000 |
| C | -5.914479000  | 7.818651000  | -0.464821000 |
| H | -4.859083000  | 8.075096000  | -0.377368000 |
| C | -7.651574000  | 6.116365000  | -0.457483000 |
| C | -8.600386000  | 7.146361000  | -0.680000000 |
| C | -6.848240000  | 8.839396000  | -0.723993000 |
| C | -13.425112000 | 7.483531000  | -0.905332000 |
| H | -13.683684000 | 8.539951000  | -0.830106000 |
| C | -6.305381000  | 6.491380000  | -0.328310000 |
| H | -5.575566000  | 5.707005000  | -0.123148000 |
| F | 1.501289000   | 4.188040000  | -0.919891000 |
| F | 2.581596000   | 9.565454000  | -1.219386000 |
| F | 0.000865000   | 10.084275000 | -1.101893000 |
| F | -1.042127000  | 4.707435000  | -0.714982000 |
| F | 4.023008000   | 5.084565000  | -1.234538000 |
| F | -3.025713000  | 6.504782000  | -0.593154000 |
| F | 4.552744000   | 7.750868000  | -1.347683000 |
| F | -2.520132000  | 9.171294000  | -0.797181000 |
| C | 0.894351000   | 7.847330000  | -1.050603000 |
| C | 0.619797000   | 6.429760000  | -0.952453000 |
| C | -1.495846000  | 8.303279000  | -0.847222000 |
| C | -0.725202000  | 6.017156000  | -0.797633000 |
| C | 3.002594000   | 5.960280000  | -1.163149000 |
| C | 1.704178000   | 5.519357000  | -1.016184000 |
| C | -1.758337000  | 6.926085000  | -0.740559000 |
| C | 2.244828000   | 8.253087000  | -1.182239000 |
| C | -0.195788000  | 8.750261000  | -0.998263000 |

|   |               |              |              |
|---|---------------|--------------|--------------|
| C | 3.272434000   | 7.337875000  | -1.240731000 |
| N | -10.115274000 | -0.506297000 | -3.373356000 |
| N | -9.701562000  | 0.768947000  | -3.252125000 |
| O | -7.676870000  | -1.273644000 | -2.824732000 |
| H | -8.649048000  | -1.368509000 | -3.044835000 |
| N | -10.650663000 | 1.706435000  | -3.231458000 |
| C | -7.912696000  | 2.413392000  | -3.281407000 |
| H | -8.683222000  | 3.161979000  | -3.453350000 |
| C | -11.464522000 | -0.397852000 | -3.440269000 |
| C | -6.117609000  | 4.195228000  | -3.373984000 |
| H | -6.666524000  | 4.686013000  | -4.191048000 |
| H | -5.042018000  | 4.236521000  | -3.600013000 |
| H | -6.302861000  | 4.782891000  | -2.460148000 |
| C | -14.109140000 | 0.425157000  | -3.503929000 |
| H | -15.163275000 | 0.705424000  | -3.529277000 |
| C | -13.766461000 | -0.953595000 | -3.621944000 |
| H | -14.569987000 | -1.679589000 | -3.753737000 |
| C | -12.451968000 | -1.390098000 | -3.597293000 |
| H | -12.175484000 | -2.434945000 | -3.714841000 |
| C | -11.797798000 | 0.986551000  | -3.348343000 |
| C | -5.633222000  | 1.748203000  | -2.935494000 |
| H | -4.577872000  | 2.005573000  | -2.847652000 |
| C | -7.370320000  | 0.045918000  | -2.928136000 |
| C | -8.319176000  | 1.076837000  | -3.150284000 |
| C | -6.566987000  | 2.768950000  | -3.194653000 |
| C | -13.143902000 | 1.414009000  | -3.375616000 |
| H | -13.402472000 | 2.470429000  | -3.300390000 |
| C | -6.024091000  | 0.420971000  | -2.798948000 |
| H | -5.294373000  | -0.363552000 | -2.593806000 |
| F | 1.782499000   | -1.881483000 | -3.390175000 |
| F | 2.862851000   | 3.495006000  | -3.690046000 |
| F | 0.282076000   | 4.014752000  | -3.572177000 |
| F | -0.761100000  | -1.362928000 | -3.185491000 |
| F | 4.304263000   | -0.985882000 | -3.705198000 |
| F | -2.744459000  | 0.434335000  | -3.063814000 |
| F | 4.833956000   | 1.681345000  | -3.817966000 |
| F | -2.238921000  | 3.101772000  | -3.267465000 |
| C | 1.175606000   | 1.776881000  | -3.521263000 |
| C | 0.901059000   | 0.359324000  | -3.423024000 |
| C | -1.214590000  | 2.232831000  | -3.317883000 |
| C | -0.443776000  | -0.053343000 | -3.268466000 |
| C | 3.283848000   | -0.110167000 | -3.633809000 |
| C | 1.985391000   | -0.550166000 | -3.486467000 |
| C | -1.477086000  | 0.855634000  | -3.211234000 |

|   |               |              |              |
|---|---------------|--------------|--------------|
| C | 2.526082000   | 2.182639000  | -3.652899000 |
| C | 0.085466000   | 2.679814000  | -3.468924000 |
| C | 3.553688000   | 1.267428000  | -3.711391000 |
| N | 0.096073000   | 5.121642000  | 2.299247000  |
| N | -0.441891000  | 6.348058000  | 2.432119000  |
| O | -2.235994000  | 4.109819000  | 2.906097000  |
| H | -1.265799000  | 4.115074000  | 2.662786000  |
| N | 0.405540000   | 7.377346000  | 2.431737000  |
| C | -2.389831000  | 7.800766000  | 2.448546000  |
| H | -1.705381000  | 8.624008000  | 2.258806000  |
| C | 1.425101000   | 5.367512000  | 2.199564000  |
| C | -4.359575000  | 9.390309000  | 2.402421000  |
| H | -3.884891000  | 9.933660000  | 1.572812000  |
| H | -5.438921000  | 9.320147000  | 2.202352000  |
| H | -4.214247000  | 9.995039000  | 3.312158000  |
| C | 3.969227000   | 6.457683000  | 2.072820000  |
| H | 4.988253000   | 6.843396000  | 2.021736000  |
| C | 3.767664000   | 5.051002000  | 1.961473000  |
| H | 4.636814000   | 4.410840000  | 1.809209000  |
| C | 2.504722000   | 4.482262000  | 2.017613000  |
| H | 2.334913000   | 3.414435000  | 1.905482000  |
| C | 1.617054000   | 6.779792000  | 2.285451000  |
| C | -2.678265000  | 5.391612000  | 2.812330000  |
| C | -1.845628000  | 6.512993000  | 2.568066000  |
| C | -3.763384000  | 8.017724000  | 2.568938000  |
| C | 2.911322000   | 7.341800000  | 2.225504000  |
| H | 3.063212000   | 8.418903000  | 2.296636000  |
| C | -4.053235000  | 5.626947000  | 2.974857000  |
| H | -4.692830000  | 4.772150000  | 3.196827000  |
| F | -11.285523000 | -3.586414000 | 0.110437000  |
| F | -12.916402000 | 1.650961000  | -0.156271000 |
| F | -10.400263000 | 2.432230000  | -0.100748000 |
| F | -8.804109000  | -2.810026000 | 0.253654000  |
| F | -13.892630000 | -2.953977000 | -0.141850000 |
| F | -7.011750000  | -0.819049000 | 0.329114000  |
| F | -14.695086000 | -0.355103000 | -0.238323000 |
| F | -7.792390000  | 1.782413000  | 0.141227000  |
| C | -11.059574000 | 0.114682000  | -0.030839000 |
| C | -10.638089000 | -1.267163000 | 0.058885000  |
| C | -8.724341000  | 0.813095000  | 0.114745000  |
| C | -9.255717000  | -1.539894000 | 0.180100000  |
| C | -12.964753000 | -1.978296000 | -0.094293000 |
| C | -11.625876000 | -2.282971000 | 0.020789000  |
| N | -9.927884000  | -2.565879000 | 3.306802000  |

|   |               |              |              |
|---|---------------|--------------|--------------|
| C | -8.318771000  | -0.529854000 | 0.213207000  |
| N | -9.514201000  | -1.290257000 | 3.427107000  |
| O | -7.489511000  | -3.332848000 | 3.854500000  |
| H | -8.461688000  | -3.427714000 | 3.634396000  |
| C | -12.447291000 | 0.379943000  | -0.128981000 |
| N | -10.463273000 | -0.353147000 | 3.448700000  |
| C | -10.065612000 | 1.124550000  | -0.003993000 |
| C | -7.725337000  | 0.354187000  | 3.397824000  |
| H | -8.495863000  | 1.102774000  | 3.225882000  |
| C | -13.375966000 | -0.635646000 | -0.163544000 |
| C | -11.277131000 | -2.457433000 | 3.239888000  |
| C | -5.930272000  | 2.135977000  | 3.305272000  |
| H | -6.479165000  | 2.626808000  | 2.488183000  |
| H | -4.854659000  | 2.177314000  | 3.079219000  |
| H | -6.115484000  | 2.723747000  | 4.219052000  |
| C | -13.921781000 | -1.634048000 | 3.175303000  |
| H | -14.975916000 | -1.353781000 | 3.149954000  |
| C | -13.579102000 | -3.012800000 | 3.057287000  |
| H | -14.382628000 | -3.738793000 | 2.925494000  |
| C | -12.264610000 | -3.449302000 | 3.081938000  |
| H | -11.988125000 | -4.494150000 | 2.964390000  |
| C | -11.610407000 | -1.073030000 | 3.331815000  |
| C | -5.445863000  | -0.311001000 | 3.743737000  |
| H | -4.390481000  | -0.054008000 | 3.832506000  |
| C | -7.182961000  | -2.013286000 | 3.751096000  |
| C | -8.131815000  | -0.982367000 | 3.528948000  |
| C | -6.379627000  | 0.709745000  | 3.484578000  |
| C | -12.956542000 | -0.645195000 | 3.303615000  |
| H | -13.215082000 | 0.410848000  | 3.379768000  |
| C | -5.836701000  | -1.638611000 | 3.881210000  |
| H | -5.107015000  | -2.422757000 | 4.085426000  |
| F | 9.136120000   | 6.691594000  | -0.304914000 |
| F | 8.055783000   | 1.314555000  | -0.006345000 |
| F | 10.636543000  | 0.795359000  | -0.122912000 |
| F | 11.679764000  | 6.172114000  | -0.509975000 |
| F | 6.614369000   | 5.795444000  | 0.008806000  |
| F | 13.663121000  | 4.374850000  | -0.631651000 |
| F | 6.084647000   | 3.129150000  | 0.121976000  |
| F | 13.157541000  | 1.708339000  | -0.427624000 |
| C | 9.743027000   | 3.032681000  | -0.175128000 |
| C | 10.017605000  | 4.449862000  | -0.272441000 |
| C | 12.133254000  | 2.576355000  | -0.377583000 |
| C | 11.362440000  | 4.862528000  | -0.427000000 |
| C | 7.634815000   | 4.919352000  | -0.061655000 |

|   |              |              |              |
|---|--------------|--------------|--------------|
| C | 8.933231000  | 5.360277000  | -0.208621000 |
| N | 10.700040000 | 3.752144000  | 3.144507000  |
| C | 12.395719000 | 3.953927000  | -0.485158000 |
| N | 11.238036000 | 2.525353000  | 3.012561000  |
| O | 13.032035000 | 4.763885000  | 2.538457000  |
| H | 12.061956000 | 4.758163000  | 2.781943000  |
| C | 8.392583000  | 2.626547000  | -0.042560000 |
| N | 10.390604000 | 1.496065000  | 3.012943000  |
| C | 10.833166000 | 2.129748000  | -0.227468000 |
| C | 13.185975000 | 1.072645000  | 2.996135000  |
| H | 12.501525000 | 0.249404000  | 3.185874000  |
| C | 7.364941000  | 3.542138000  | 0.014985000  |
| C | 9.371012000  | 3.506276000  | 3.244182000  |
| C | 15.155719000 | -0.516897000 | 3.042259000  |
| H | 14.681035000 | -1.060249000 | 3.871869000  |
| H | 16.235066000 | -0.446737000 | 3.242329000  |
| H | 15.010391000 | -1.121628000 | 2.132522000  |
| C | 6.826887000  | 2.416103000  | 3.370934000  |
| H | 5.807860000  | 2.030391000  | 3.422018000  |
| C | 7.028481000  | 3.822406000  | 3.483219000  |
| H | 6.159332000  | 4.462572000  | 3.635472000  |
| C | 8.291406000  | 4.391155000  | 3.427040000  |
| H | 8.461301000  | 5.458907000  | 3.539128000  |
| C | 9.179060000  | 2.093995000  | 3.158303000  |
| C | 15.376329000 | 1.966256000  | 2.595170000  |
| H | 16.449945000 | 1.819428000  | 2.480735000  |
| C | 13.474487000 | 3.481825000  | 2.632323000  |
| C | 12.641817000 | 2.359495000  | 2.876263000  |
| C | 14.559496000 | 0.856063000  | 2.874816000  |
| C | 7.884792000  | 1.531987000  | 3.218250000  |
| H | 7.732934000  | 0.454508000  | 3.148044000  |
| C | 14.849445000 | 3.246776000  | 2.468923000  |
| H | 15.488855000 | 4.101171000  | 2.247960000  |
| F | 1.969861000  | -3.940687000 | 3.289057000  |
| F | 3.050217000  | 1.435803000  | 2.989184000  |
| F | 0.469437000  | 1.955548000  | 3.107054000  |
| F | -0.573741000 | -3.422133000 | 3.493741000  |
| F | 4.491623000  | -3.045087000 | 2.974033000  |
| F | -2.557099000 | -1.624871000 | 3.615417000  |
| F | 5.021345000  | -0.378234000 | 2.862191000  |
| F | -2.051560000 | 1.042567000  | 3.411767000  |
| C | 1.362964000  | -0.282324000 | 3.157968000  |
| C | 1.088418000  | -1.699882000 | 3.256207000  |
| C | -1.027232000 | 0.173626000  | 3.361349000  |



|   |               |               |              |
|---|---------------|---------------|--------------|
| C | -0.256417000  | -2.112548000  | 3.410766000  |
| C | 3.471208000   | -2.169371000  | 3.045422000  |
| C | 2.172750000   | -2.609370000  | 3.192764000  |
| C | -1.289696000  | -1.203946000  | 3.468924000  |
| C | 2.713439000   | 0.123436000   | 3.026335000  |
| C | 0.272826000   | 0.620608000   | 3.210308000  |
| C | 3.741048000   | -0.791778000  | 2.967840000  |
| N | -9.646631000  | -8.636326000  | 0.836141000  |
| N | -9.232948000  | -7.360705000  | 0.956447000  |
| O | -7.208256000  | -9.403296000  | 1.383840000  |
| H | -8.180476000  | -9.497235000  | 1.164112000  |
| N | -10.182018000 | -6.423595000  | 0.978040000  |
| C | -7.444082000  | -5.716259000  | 0.927164000  |
| H | -8.214609000  | -4.967673000  | 0.755222000  |
| C | -10.995877000 | -8.527880000  | 0.769228000  |
| C | -5.649059000  | -3.933570000  | 0.834994000  |
| H | -6.197955000  | -3.442743000  | 0.017884000  |
| H | -4.573400000  | -3.893054000  | 0.608562000  |
| H | -5.834275000  | -3.345755000  | 1.748755000  |
| C | -13.640571000 | -7.703571000  | 0.705019000  |
| H | -14.694661000 | -7.424229000  | 0.679294000  |
| C | -13.297890000 | -9.082323000  | 0.587003000  |
| H | -14.101415000 | -9.808315000  | 0.455210000  |
| C | -11.983398000 | -9.518823000  | 0.611655000  |
| H | -11.706913000 | -10.563672000 | 0.494107000  |
| C | -11.329196000 | -7.142552000  | 0.861532000  |
| C | -5.164651000  | -6.380523000  | 1.273453000  |
| H | -4.109227000  | -6.124455000  | 1.361846000  |
| C | -6.901750000  | -8.082809000  | 1.280812000  |
| C | -7.850561000  | -7.052814000  | 1.058287000  |
| C | -6.098408000  | -5.359777000  | 1.014329000  |
| C | -12.675288000 | -6.715643000  | 0.832955000  |
| H | -12.933827000 | -5.659599000  | 0.909108000  |
| C | -5.555489000  | -7.708132000  | 1.410926000  |
| H | -4.825802000  | -8.492278000  | 1.615142000  |
| F | 9.417375000   | 0.621146000   | -2.775574000 |
| F | 8.336993000   | -4.754968000  | -2.476629000 |
| F | 10.917798000  | -5.275089000  | -2.593572000 |
| F | 11.960976000  | 0.102593000   | -2.980258000 |
| F | 6.895581000   | -0.274078000  | -2.461477000 |
| F | 13.944333000  | -1.694671000  | -3.101934000 |
| F | 6.365993000   | -2.941231000  | -2.348541000 |
| F | 13.438797000  | -4.362108000  | -2.898284000 |
| C | 10.024239000  | -3.036843000  | -2.645412000 |

|   |              |               |              |
|---|--------------|---------------|--------------|
| C | 10.298816000 | -1.619659000  | -2.742724000 |
| C | 12.414466000 | -3.493168000  | -2.847866000 |
| C | 11.643651000 | -1.206995000  | -2.897283000 |
| C | 7.916027000  | -1.150169000  | -2.531943000 |
| C | 9.214485000  | -0.710170000  | -2.679281000 |
| N | 10.981295000 | -2.318302000  | 0.673847000  |
| C | 12.676931000 | -2.115595000  | -2.955441000 |
| N | 11.519290000 | -3.545094000  | 0.541901000  |
| O | 13.313289000 | -1.306564000  | 0.067797000  |
| H | 12.343168000 | -1.311359000  | 0.311659000  |
| C | 8.673791000  | -3.442976000  | -2.512870000 |
| N | 10.671858000 | -4.574383000  | 0.542283000  |
| C | 11.114379000 | -3.939774000  | -2.697752000 |
| C | 13.467229000 | -4.997802000  | 0.525474000  |
| H | 12.782780000 | -5.821043000  | 0.715214000  |
| C | 7.646122000  | -2.527300000  | -2.455345000 |
| C | 9.652266000  | -2.564172000  | 0.773522000  |
| C | 15.436932000 | -6.586420000  | 0.571976000  |
| H | 14.962246000 | -7.129772000  | 1.401585000  |
| H | 16.516321000 | -6.517185000  | 0.771669000  |
| H | 15.291602000 | -7.191150000  | -0.337762000 |
| C | 7.108105000  | -3.653423000  | 0.900704000  |
| H | 6.089116000  | -4.040058000  | 0.951358000  |
| C | 7.309653000  | -2.247178000  | 1.012968000  |
| H | 6.440462000  | -1.607030000  | 1.165122000  |
| C | 8.572614000  | -1.678362000  | 0.956718000  |
| H | 8.742513000  | -0.610615000  | 1.068845000  |
| C | 9.460271000  | -3.975526000  | 0.688020000  |
| C | 15.657542000 | -4.103266000  | 0.124887000  |
| H | 16.731201000 | -4.251019000  | 0.010075000  |
| C | 13.755698000 | -2.587696000  | 0.162040000  |
| C | 12.923029000 | -3.710027000  | 0.405980000  |
| C | 14.840708000 | -5.213460000  | 0.404533000  |
| C | 8.166046000  | -4.538460000  | 0.747590000  |
| H | 8.014188000  | -5.615940000  | 0.677384000  |
| C | 15.130655000 | -2.822746000  | -0.001361000 |
| H | 15.770066000 | -1.968352000  | -0.222323000 |
| F | 2.251113000  | -10.011135000 | 0.818397000  |
| F | 3.331291000  | -4.633668000  | 0.518974000  |
| F | 0.750691000  | -4.114900000  | 0.636394000  |
| F | -0.292529000 | -9.491655000  | 1.023457000  |
| F | 4.772835000  | -9.114610000  | 0.503750000  |
| F | -2.275887000 | -7.694392000  | 1.145133000  |
| F | 5.302600000  | -6.448682000  | 0.391531000  |

|   |              |              |              |
|---|--------------|--------------|--------------|
| F | -1.770307000 | -5.027881000 | 0.941106000  |
| C | 1.644181000  | -6.351846000 | 0.687725000  |
| C | 1.369629000  | -7.769404000 | 0.785923000  |
| C | -0.746019000 | -5.895896000 | 0.891065000  |
| C | 0.024796000  | -8.182069000 | 0.940482000  |
| C | 3.752419000  | -8.238894000 | 0.575138000  |
| C | 2.454006000  | -8.679818000 | 0.722104000  |
| N | 0.687164000  | -7.071311000 | -2.631951000 |
| C | -1.008484000 | -7.273468000 | 0.998640000  |
| N | 0.149200000  | -5.844896000 | -2.499079000 |
| O | -1.644800000 | -8.083425000 | -2.024975000 |
| H | -0.674722000 | -8.077703000 | -2.268460000 |
| C | 2.994758000  | -5.946118000 | 0.555940000  |
| N | 0.996631000  | -4.815605000 | -2.499460000 |
| C | 0.554037000  | -5.448915000 | 0.740024000  |
| C | -1.798739000 | -4.392186000 | -2.482652000 |
| H | -1.114289000 | -3.568945000 | -2.672392000 |
| C | 4.022257000  | -6.861300000 | 0.497520000  |
| C | 2.016192000  | -6.825441000 | -2.731626000 |
| C | -3.768503000 | -2.802569000 | -2.528823000 |
| H | -3.293770000 | -2.259309000 | -3.358378000 |
| H | -4.847831000 | -2.872789000 | -2.728856000 |
| H | -3.623159000 | -2.197977000 | -1.618911000 |
| C | 4.560317000  | -5.735269000 | -2.858376000 |
| H | 5.579345000  | -5.349557000 | -2.909457000 |
| C | 4.358753000  | -7.141947000 | -2.969736000 |
| H | 5.227902000  | -7.782115000 | -3.121990000 |
| C | 3.095829000  | -7.710696000 | -2.913558000 |
| H | 2.925934000  | -8.778449000 | -3.025646000 |
| C | 2.208144000  | -5.413161000 | -2.645753000 |
| C | -3.989095000 | -5.285798000 | -2.081688000 |
| H | -5.062742000 | -5.138593000 | -1.968179000 |
| C | -2.087253000 | -6.801366000 | -2.118841000 |
| C | -1.254541000 | -5.679963000 | -2.363157000 |
| C | -3.172292000 | -4.175229000 | -2.362259000 |
| C | 3.502441000  | -4.851157000 | -2.705686000 |
| H | 3.654249000  | -3.774040000 | -2.634538000 |
| C | -3.462239000 | -6.565941000 | -1.956367000 |
| H | -4.101619000 | -7.420712000 | -1.734478000 |
| C | -4.599876000 | 6.908551000  | 2.742208000  |
| H | -5.661740000 | 7.032624000  | 2.698101000  |
